# Supplementary material for: Kiwi genome provides insights into evolution of a nocturnal lifestyle
Source: Springer Nature journal article supplement (doi:10.1186/s13059-015-0711-4), 2015-07-21
Supplement: 13059_2015_711_MOESM1_ESM.pdf [file 13059_2015_711_MOESM1_ESM.pdf]

## Supplementary Material

---

# **Kiwi genome provides insights into evolution of a nocturnal lifestyle**

Diana Le Duc<sup>1,2</sup>, Gabriel Renaud<sup>2</sup>, Arunkumar Krishnan<sup>3</sup>, Markus Sällman Almén<sup>3</sup>, Leon Huynen<sup>4</sup>, Sonja J. Prohaska<sup>5</sup>, Matthias Ongyerth<sup>2</sup>, Bárbara D. Bitarello<sup>6</sup>, Helgi B. Schiöth<sup>3</sup>, Michael Hofreiter<sup>7</sup>, Peter F. Stadler<sup>5</sup>, Kay Prüfer<sup>2</sup>, David Lambert<sup>4</sup>, Janet Kelso<sup>2</sup> & Torsten Schöneberg<sup>1</sup>

<sup>1</sup>Institute of Biochemistry, Medical Faculty, University of Leipzig, 04103 Leipzig, Germany

<sup>2</sup>Department of Evolutionary Genetics, Max Planck Institute for Evolutionary Anthropology, 04103 Leipzig, Germany

<sup>3</sup>Unit of Functional Pharmacology, Dept. of Neuroscience, Uppsala University Box 593, Husargatan 3, 751 24 Uppsala, Sweden

<sup>4</sup>Griffith School of Environment and School of Biomolecular and Physical Sciences, Griffith University, NATHAN QLD 4111, Queensland, Australia

<sup>5</sup>Department of Computer Science, and Interdisciplinary Center for Bioinformatics, University of Leipzig, 04103 Leipzig, Germany

<sup>6</sup> Department of Genetics and Evolutionary Biology, University of São Paulo, 05508-090 São Paulo, SP, Brazil

<sup>7</sup>Adaptive Evolutionary Genomics, Institute for Biochemistry and Biology, University Potsdam, 14469 Potsdam, Germany

The pdf file includes:

Supplementary Figures 1-15

Supplementary Tables 1-17

Supplementary Note

Supplementary References

## Contents

|                                                                    |            |
|--------------------------------------------------------------------|------------|
| <b>Supplementary Figures .....</b>                                 | <b>4</b>   |
| <b>Supplementary Tables .....</b>                                  | <b>21</b>  |
| <b>Supplementary Note .....</b>                                    | <b>70</b>  |
| <b>Sampling, DNA library preparation and sequencing .....</b>      | <b>70</b>  |
| <b>Filtering and read correction .....</b>                         | <b>72</b>  |
| <b>Genome assembly .....</b>                                       | <b>73</b>  |
| <b>Whole genome alignments .....</b>                               | <b>74</b>  |
| <b>Genome coverage and estimation of genome size .....</b>         | <b>75</b>  |
| <b>Measure for heterozygosity .....</b>                            | <b>78</b>  |
| <b>Mitochondrial genome assembly .....</b>                         | <b>80</b>  |
| <b>RNA sequencing .....</b>                                        | <b>83</b>  |
| <b><i>De novo</i> gene prediction and gene annotation .....</b>    | <b>83</b>  |
| <b>Orthologs and Ka/Ks calculation .....</b>                       | <b>84</b>  |
| <b>Gene Ontology and rapidly evolving genes .....</b>              | <b>86</b>  |
| <b>Gene families assignment using TreeFam .....</b>                | <b>87</b>  |
| <b>Gene families evolution using CAFE .....</b>                    | <b>88</b>  |
| <b>Detection and classification of the membrane proteome .....</b> | <b>90</b>  |
| <b>Phylogenetic analysis .....</b>                                 | <b>92</b>  |
| <b>Vision analysis .....</b>                                       | <b>95</b>  |
| <b>Olfaction analysis .....</b>                                    | <b>100</b> |
| <b>Limb development analysis .....</b>                             | <b>105</b> |
| <b>Supplementary References .....</b>                              | <b>112</b> |

## Supplementary Figures

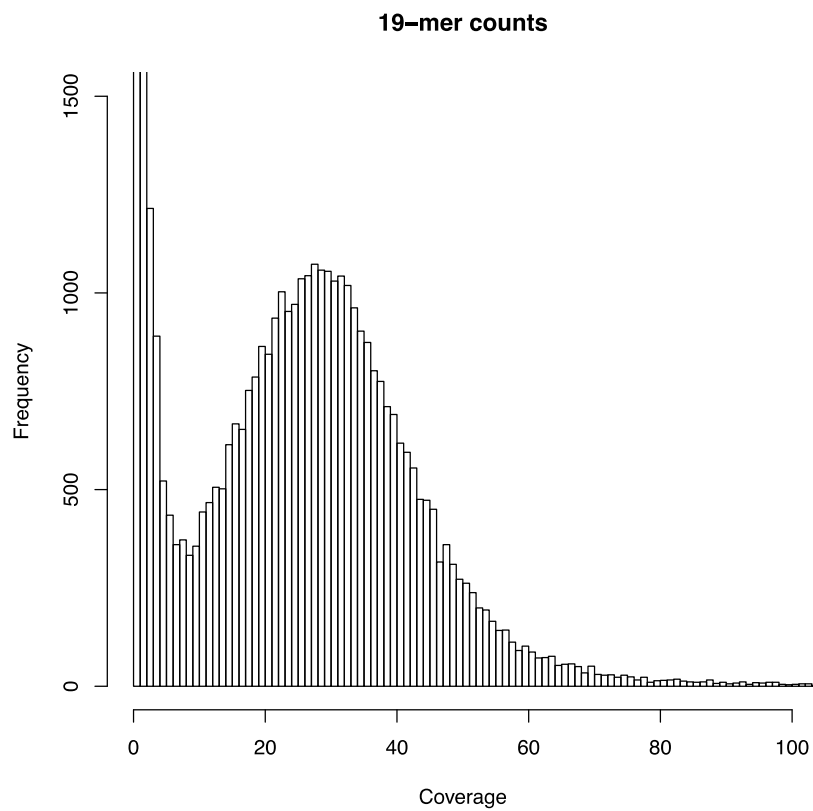

**Supplementary Fig. S1.** 19-mer frequency analysis of kiwi genome. The *k-mer* distribution for putative errors rises outside the main distribution of the *k-mer* representing the majority of the data and ends at coverage 5. The true *k-mer* distribution has a mean of 31-fold. The expected coverage ( $C_k$ ) of a *k-mer* (of size  $K$ ) in the genome using reads of length  $L$  is  $C_k = D \cdot (L - K + 1) / L$  [1], where  $D$  is the real sequencing depth. The real sequencing depth is thus estimated to be 37-fold.

**A**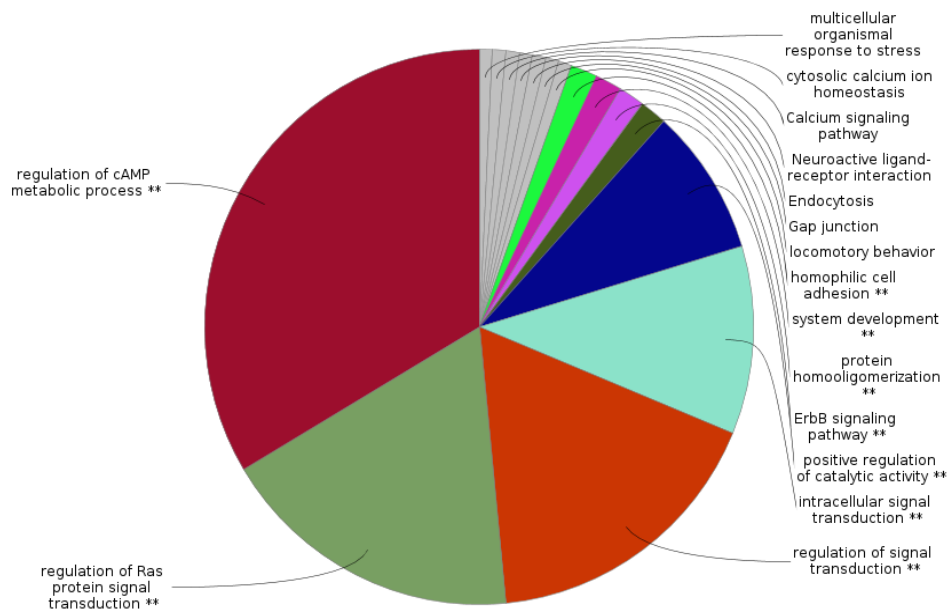**B**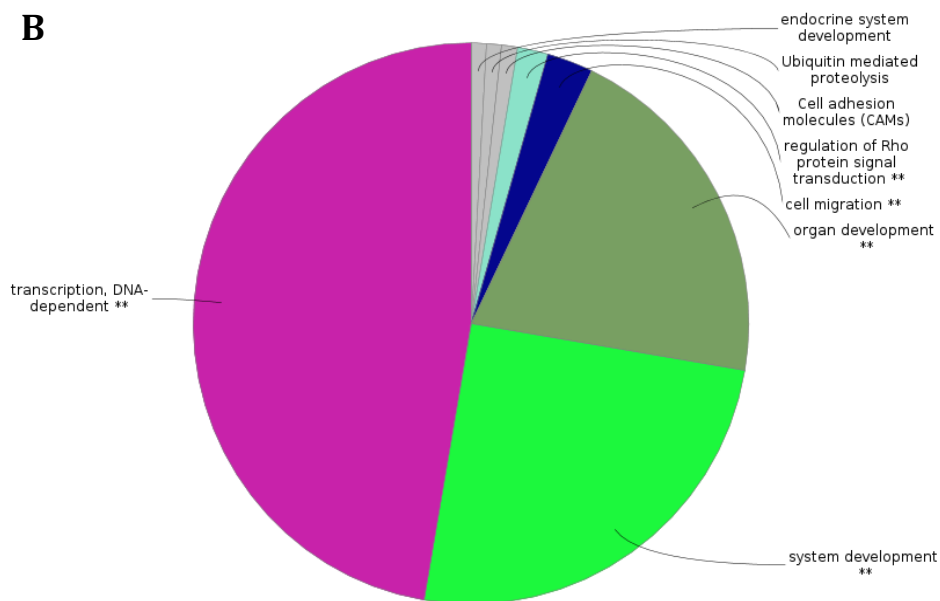

**Supplementary Fig. S2.** Enriched non-redundant biological terms for gene families with significantly different sizes in kiwi. GO enrichment was tested using the Pfam ID with most hits for the changed TreeFam family (as tested by CAFE [2]). The large clusters of genes corresponding to (A) expanded and (B) contracted gene families were grouped in a functional network and non-redundant biological terms with corrected FDR < 0.0001 were retrieved using ClueGO [3]; \*\* = more than 3 functionally related GO categories cluster in the same GO node.

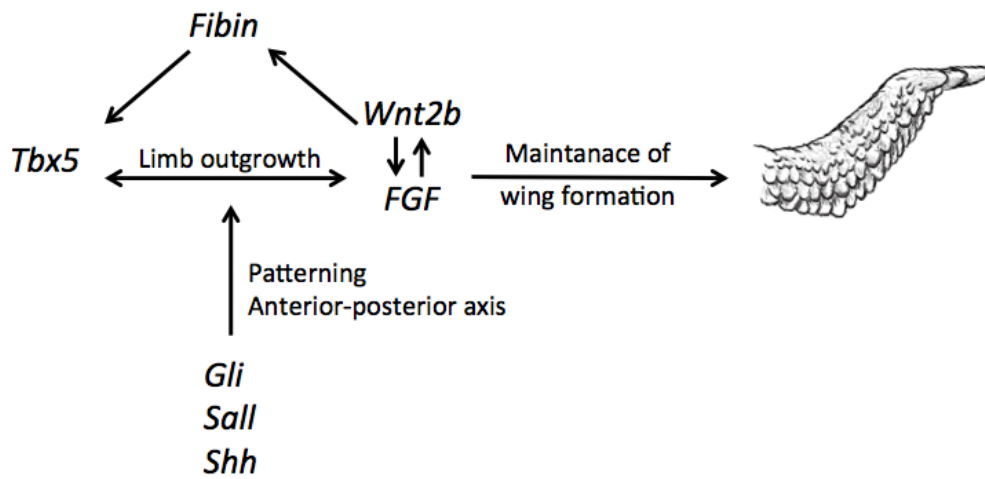

**Supplementary Fig. S3.** Pathways involved in wing development [4]. Genes, which belong to these pathways, were identified and manually surveyed in *AptMant0* (**Supplementary Table S12**). Coding regions were inspected and no obvious alterations were observed.

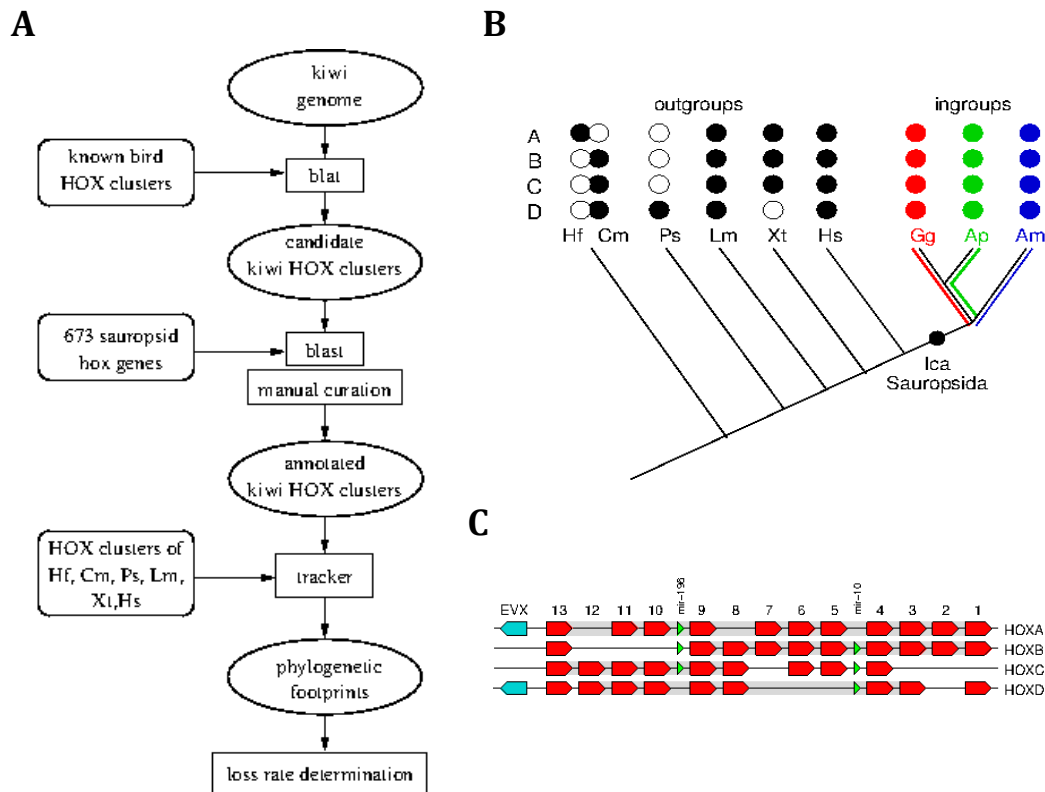

**Supplementary Fig. S4.** Workflow for kiwi HOX cluster annotation and phylogenetic footprinting. (A) Analysis pipeline. The *AptMant0* genome was searched for homologies with known bird HOX clusters (Gg – *Gallus gallus*, Ap – *Anas platyrhynchos*) using blat [5]. The following sequences were identified as HOX cluster fragments: scaffold151:16500000-16780000 (HOXA); scaffold5189, scaffold16558, C19529309 and scaffold171:1-40000 (HOXB); scaffold2266, scaffold2703 and C20176537 (HOXC); scaffold95:16600000-16800000 and scaffold9799 (HOXD). 673 sauropsid HOX protein sequences with cluster and paralog group assignments were retrieved from GenBank [6] and mapped to the candidate clusters with tblastn [5]. The hits were manually curated to determine the exact position of the start and stop codons. Phylogenetic footprinting was performed on HOX clusters from five outgroup species (a shark, Hf – *Heterodontus francisci* or Cm – *Callorhinchus milii*; a basal *Actinopterygian*, Ps – *Polypterus senegalus*, a coelacanth, Lm – *Latimeria menadoensis*, an amphibian, Xt – *Xenopus tropicalis*, and Hs – *Homo sapiens*) and three ingroup species (Gg – *Gallus gallus*, Ap – *Anas platyrhynchos*, Am – *Apteryx mantelli*) for A, B, C and D clusters separately using tracker2 [7] (standard settings, direct comparisons among bird sequences excluded).

(B) Evaluation of footprint losses. Clusters available for footprinting are marked by full circles in contrast to missing clusters (empty circles). A footprint is counted as ancestral if at least two out of four outgroup species share a sequence of at least 15 nt. Differential

loss of ancestral footprints was studied by comparing their presence in *Galliformes* with their presence in *Apteryx*.

(C) Overview of the HOX cluster of *Apteryx mantelli*. The kiwi has four HOX clusters (HOXA, HOXB, HOXC and HOXD) with 39 *HOX* genes (red arrows), *evx1* and *evx2* (turquoise arrows) and six microRNA genes (green triangles) belonging to two distinct microRNA families. The paralogous group assignments of *HOX* genes are given at the top. Gene complement, gene order, and orientation are identical to the proposed *HOX* cluster of the sauropsid ancestor [8]. Regions used for phylogenetic footprinting are shown as grey shades.



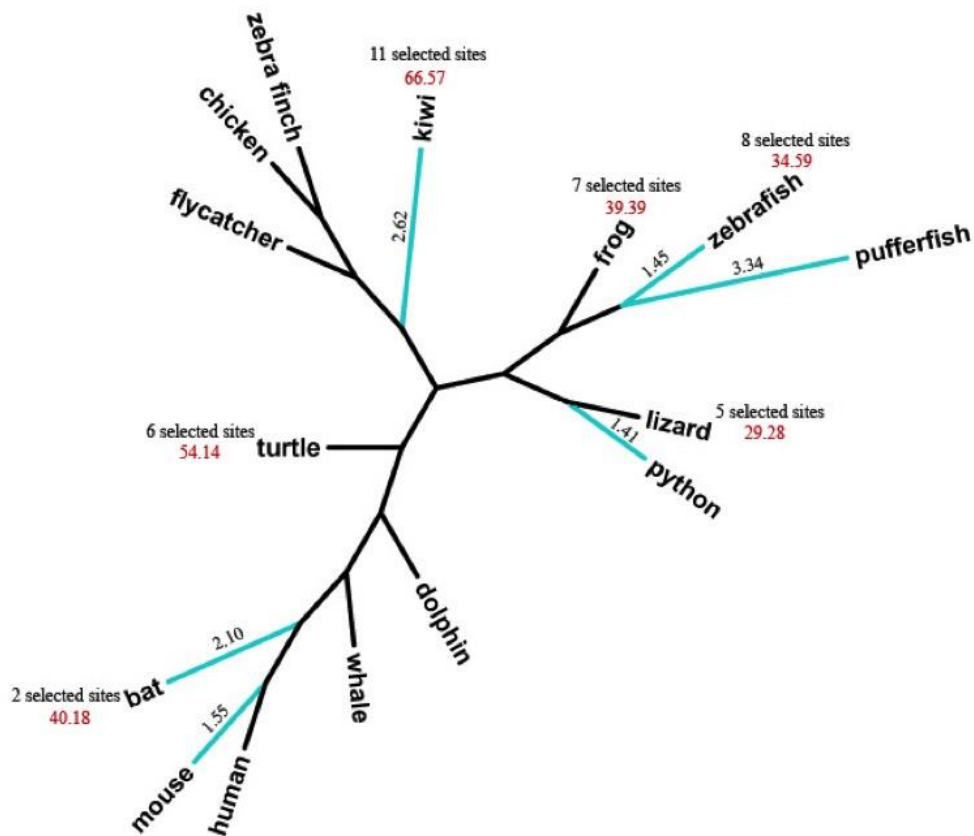

**Supplementary Fig. S5.** Phylogenetic tree for the species used in the *fibin* gene selection analysis. PAML [9] branch analysis showed signals of positive selective pressure on branches highlighted in blue ( $\omega_{\text{background}} = 1.07$ ,  $\omega_{\text{foreground}} = 2.13$ , LRT = 4.186, p-value = 0.04). Values on the branches are estimated using the free ratio model implemented in CODEML (model = 1). The number of sites where evidence for positive selection was detected in the PAML branch-site model is shown next to the corresponding species. Values in red represent LRT between the branch-site model with free  $\omega$  estimation and the model with  $\omega$  fixed to the neutral value of 1.

**A**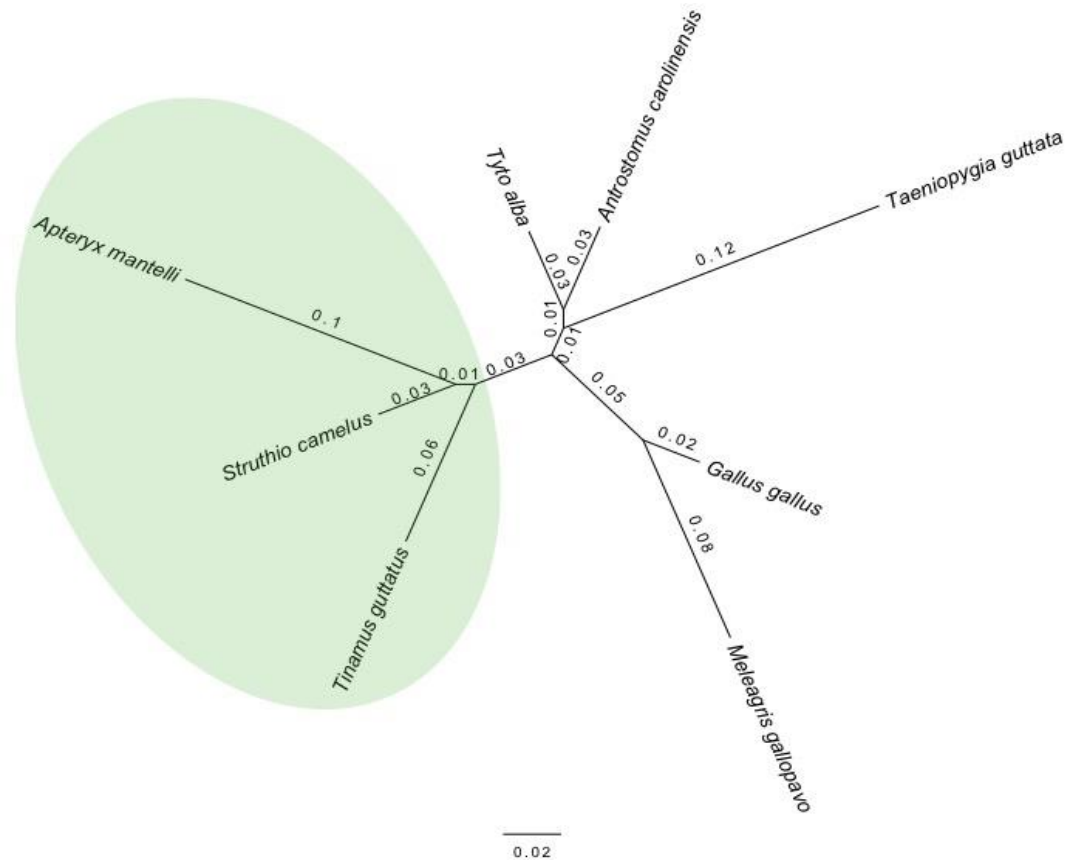**B**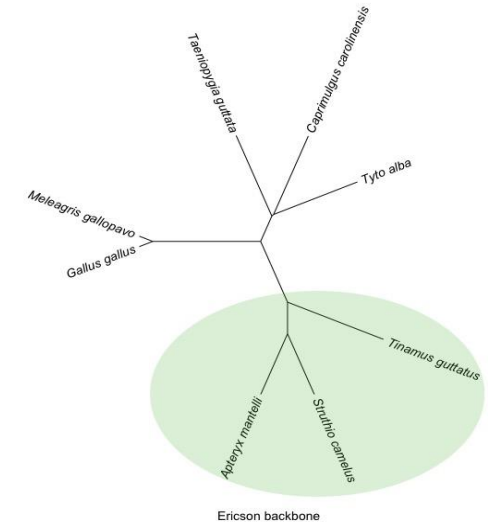**C**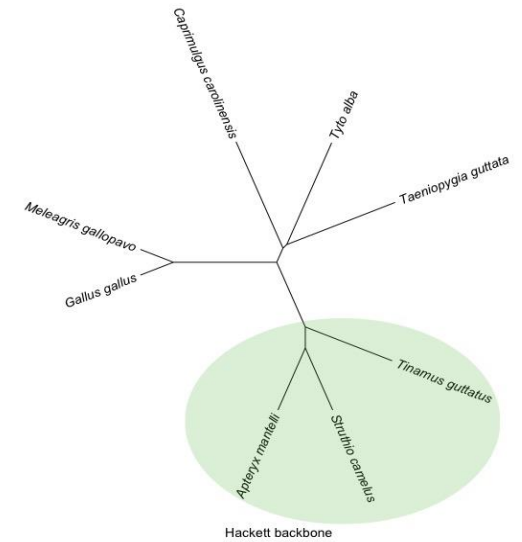

**Supplementary Fig. S6.** Phylogeny constructed to validate the position of *Tinamous guttatus* in the *Palaeognathae* clade (highlighted in light green; see Figure 1). (A) 3,939 orthologs (14,104,428 bp) in the 8 bird species were used for the tree [10]. 100 bootstraps were performed and each branch received 100% support. (B) Same species were selected in birdtree (<http://birdtree.org/>) and 100 trees were generated using Ericson backbone and (C) Hackett backbone [11]. All generated trees supported the same topology.

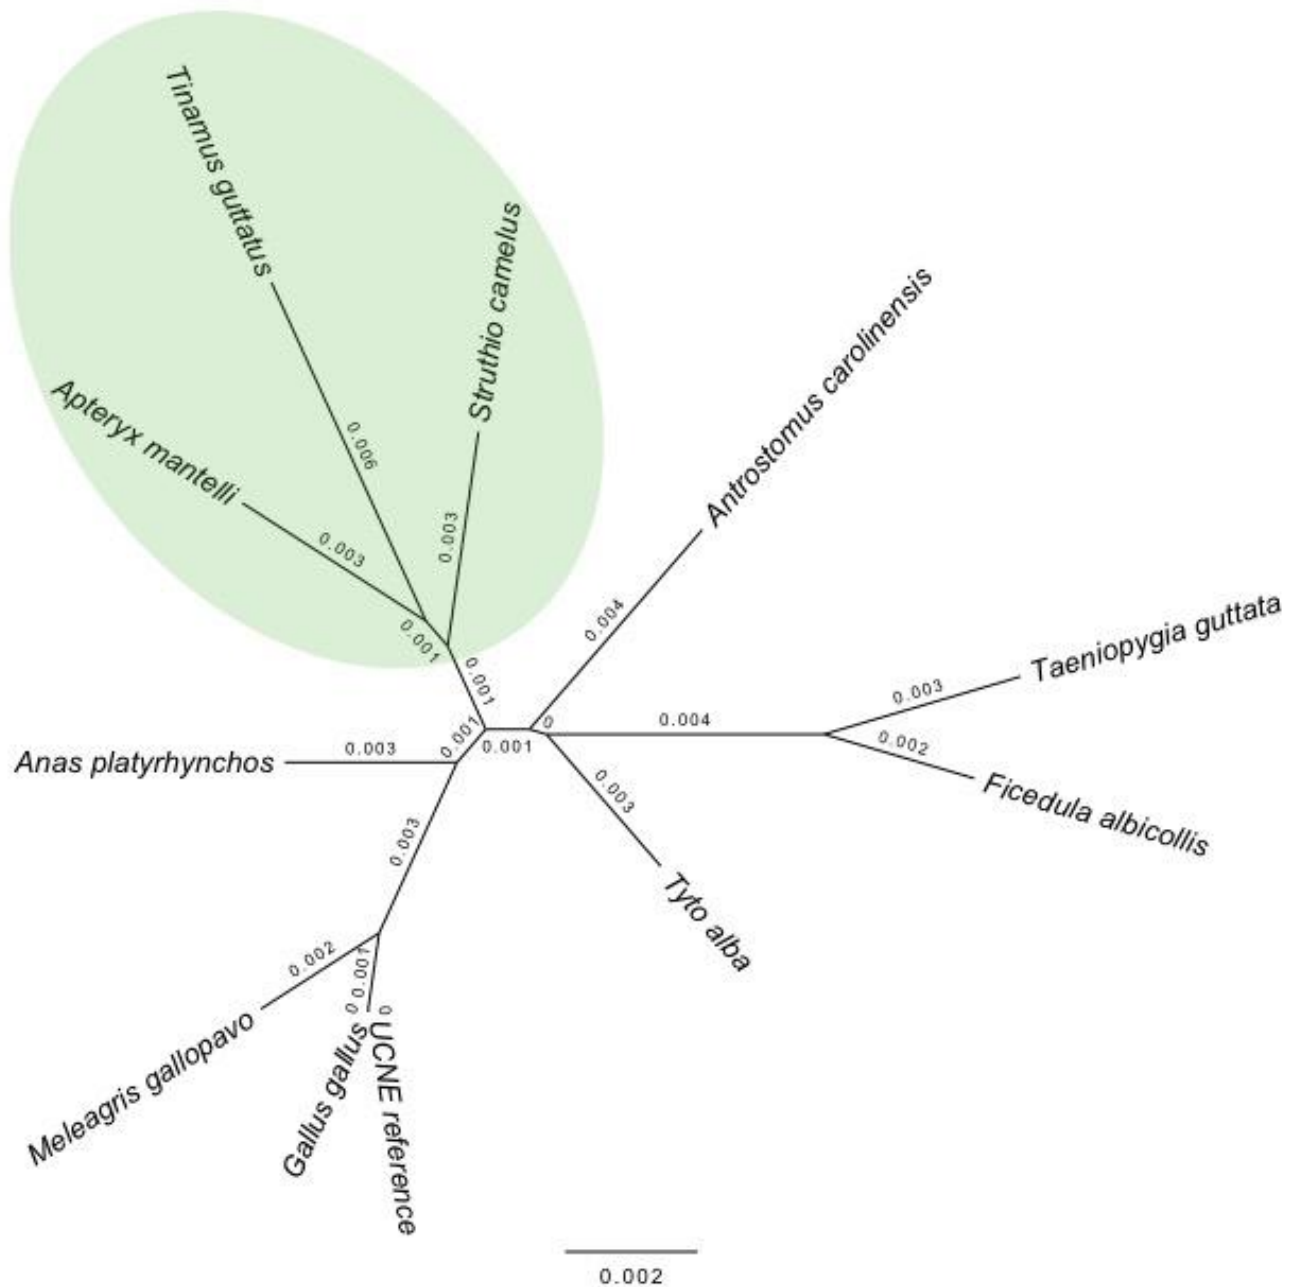

**Supplementary Fig. S7.** Phylogeny [10] built using 3,076 (1,011,462 bp) ultra-conserved non-coding regions [12], which had in all investigated genomes a length of at least 95% of the reference UCNE [12]. 100 bootstraps were performed and each branch received 100% bootstrap support. Galgal4 genome from Ensembl was used as a control of the orthologous region assignment to the reference chicken UCNE. *Palaeognathae* clade is highlighted in light green.

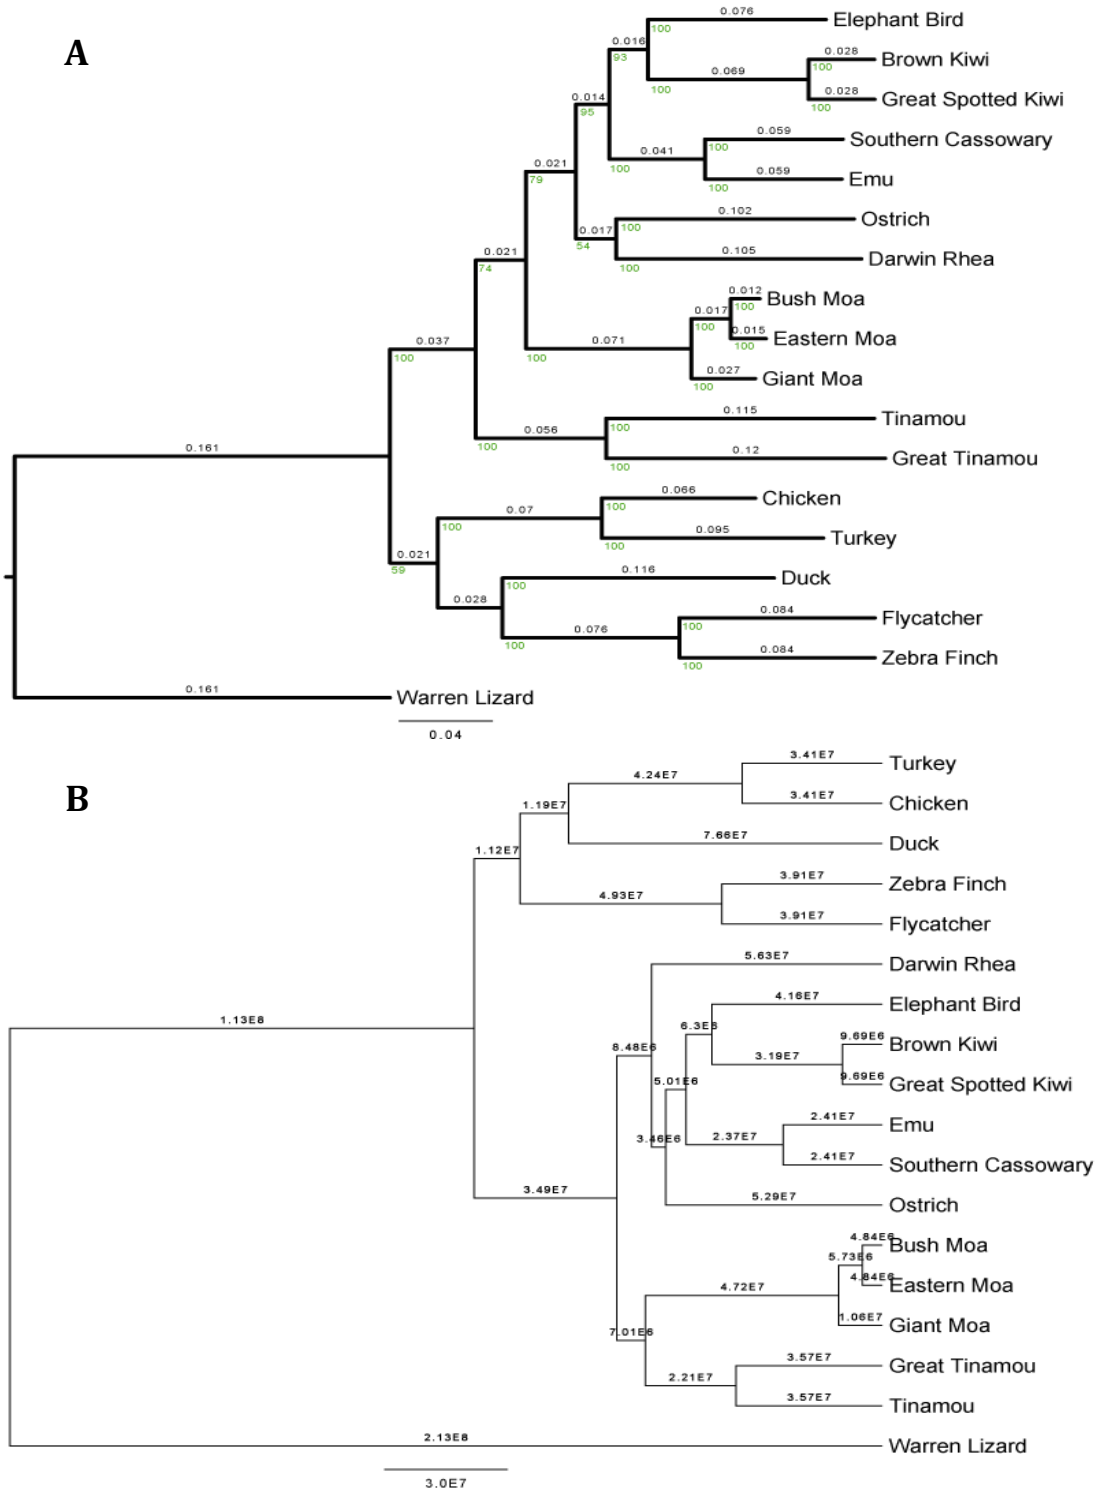

**Supplementary Fig. S8.** Phylogenetic trees constructed using mitochondrial genomes (GenBank Accession IDs in **Supplementary Table S17**). (A) Maximum likelihood tree computed with PAUP\* [10]. Numbers in green under each branch represent the bootstrap support (%) from 100 replicates. The numbers on each branch represent the branch lengths based on the number of mutations per 100 bp. (B) Molecular phylogeny of same mitochondrial genomes calculated using Bayesian inference with BEAST [13]. Branch lengths give the split time in years.

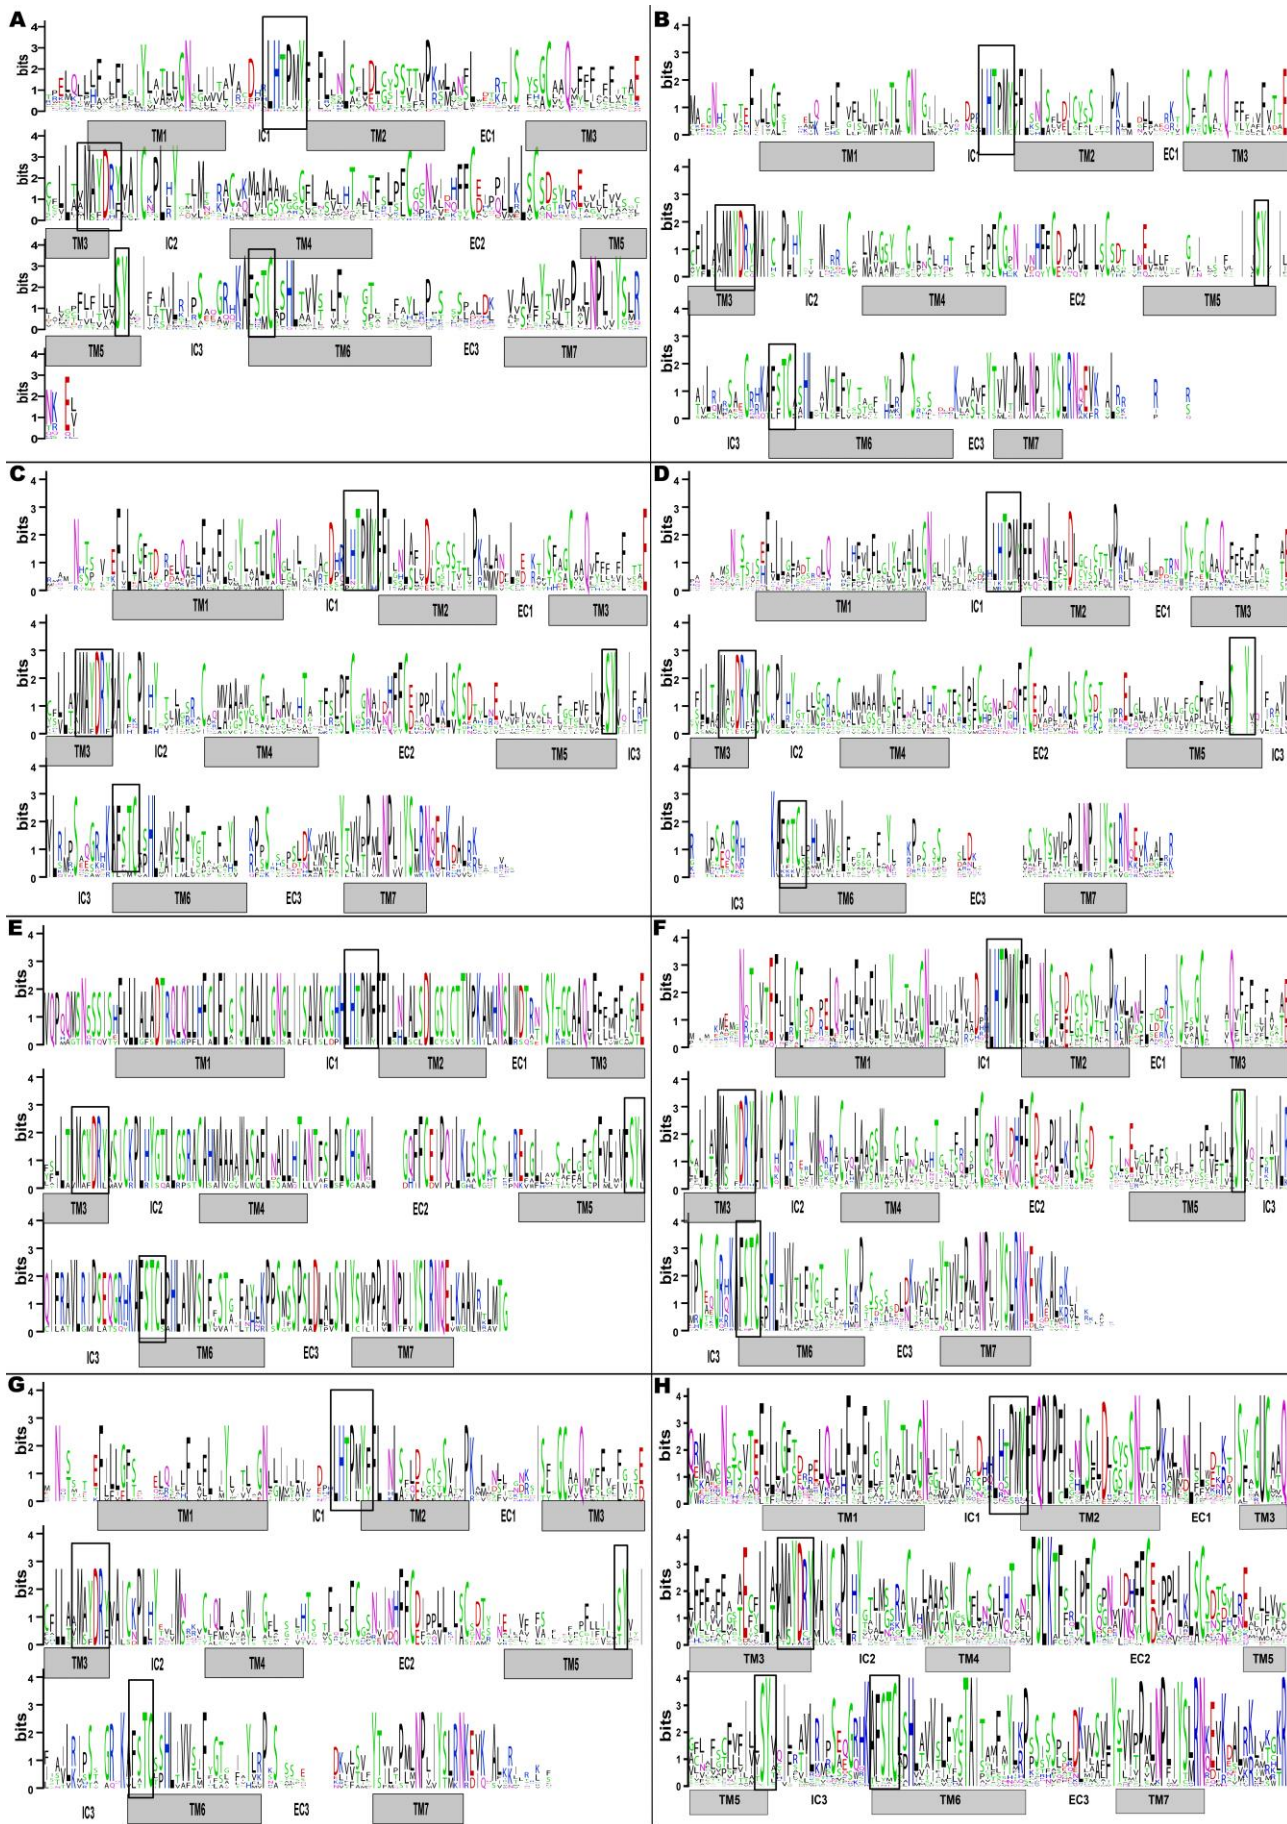



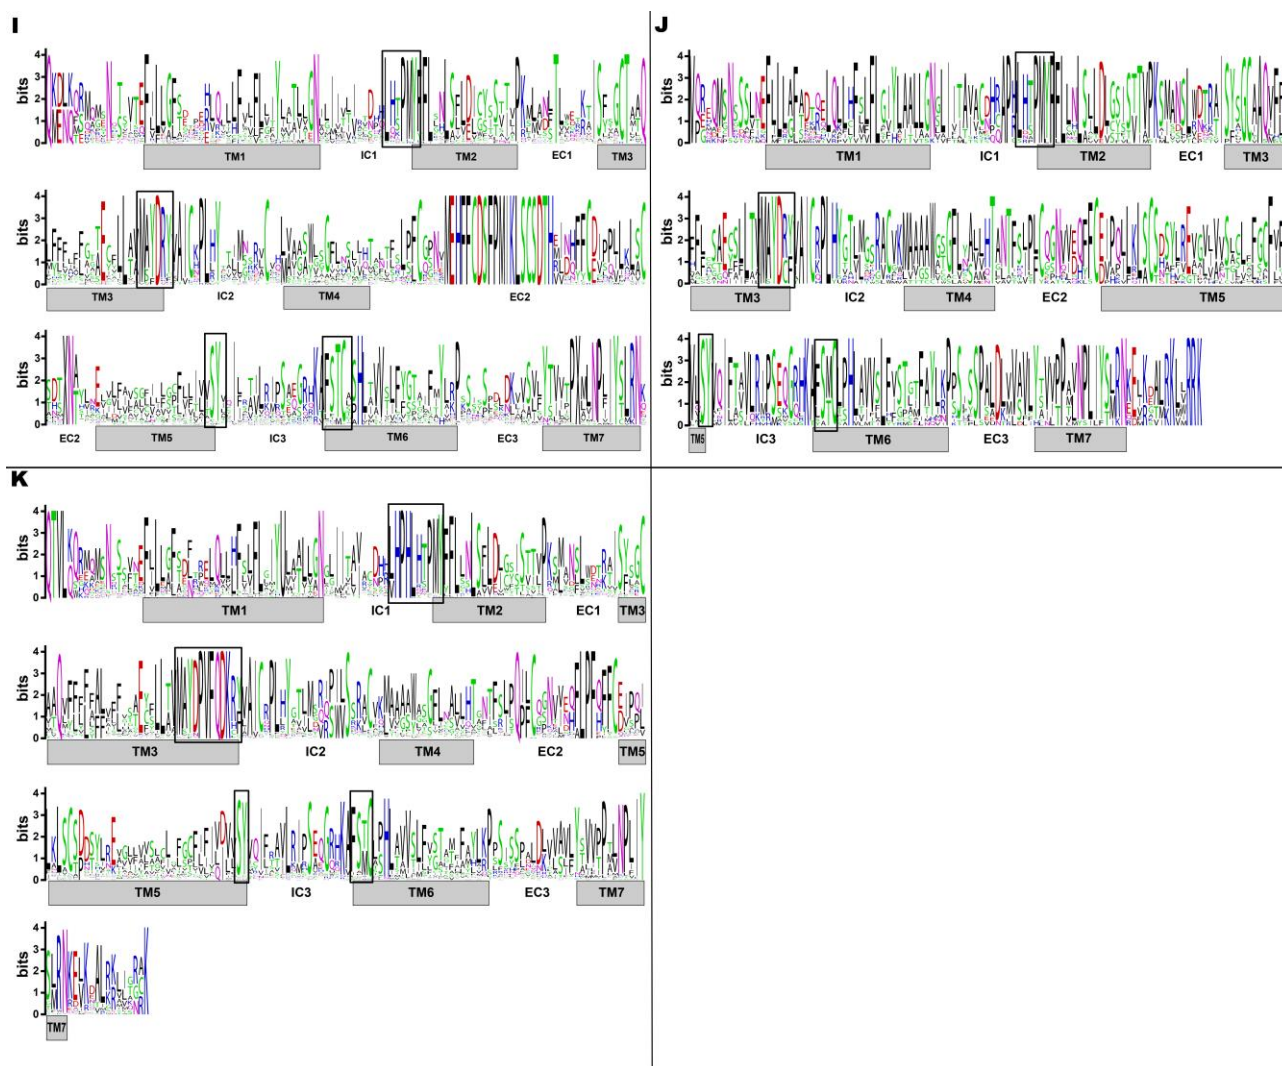

**Supplementary Fig. S9.** Amino acid sequence conservation in the reptilian and avian  $\gamma$  OR gene repertoires. Sequence logos of (A) kiwi, (B) chicken, (C) turkey, (D) flycatcher, (E) zebra finch, (F) Chinese softshell turtle, (G) green anole, (H) barn owl, (I) chuck-will's-widow, (J) ostrich, and (K) tinamou. Logos were generated using the program WebLogo [14]. Heights of amino acid letters represent the relative frequency at a given position and the overall height indicates the level of sequence conservation. Transmembrane regions (TM), intracellular (IC), and extracellular (EC) domains are marked according to sequence conservation and have not been verified experimentally in this study. Characteristic motifs and submotifs for ORs are represented by black boxes.

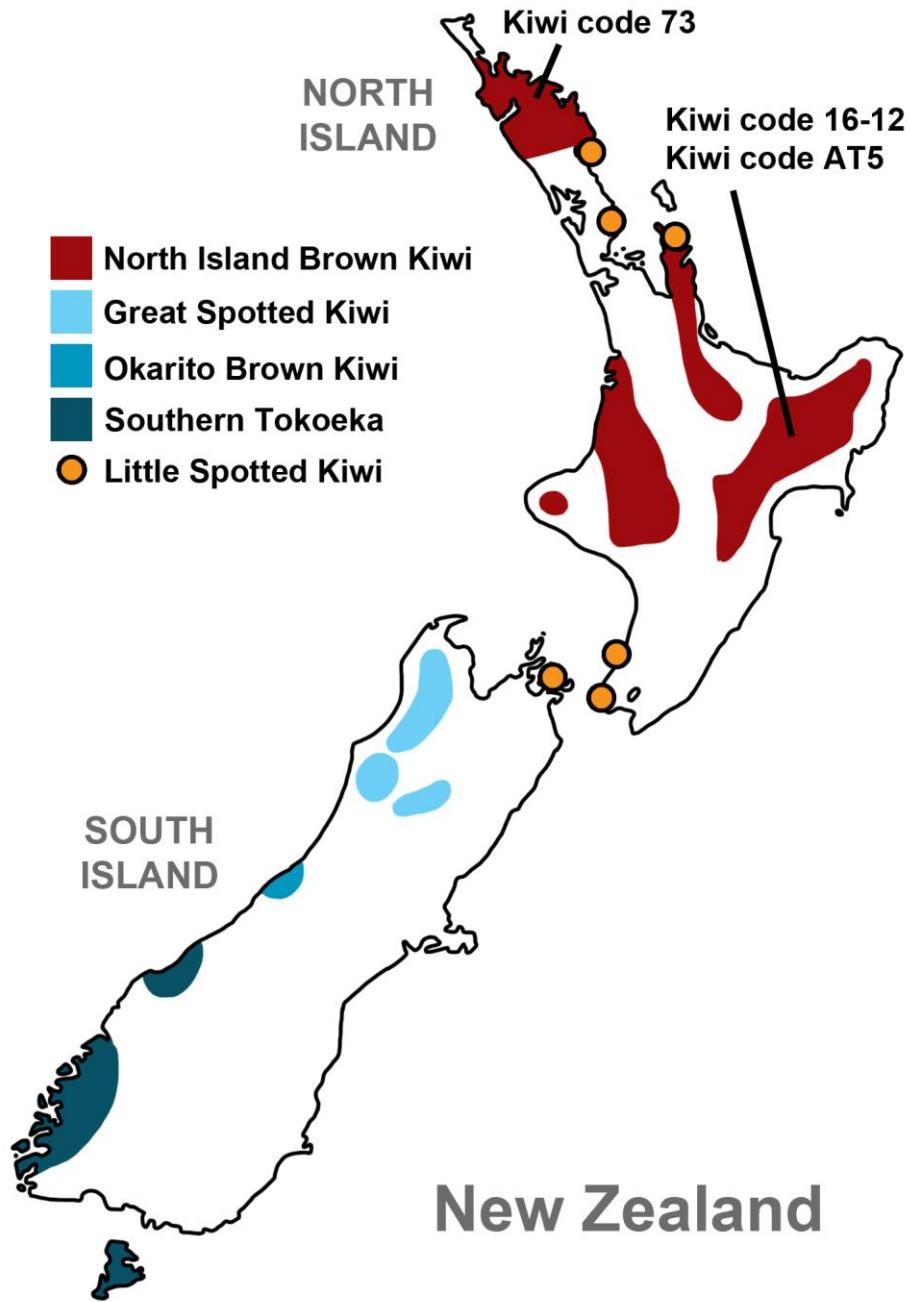

**Supplementary Fig. S10.** Present distribution of kiwi (*Apteryx* spp.) in New Zealand (source “Kiwi (*Apteryx* spp.) recovery plan 2008-2018” [15]). The three sequenced individuals originate from the far North (kiwi code 73) and central part – Lake Waikaremoana (kiwi code AT5 and kiwi code 16-12) of North Island. They were sampled in 1986 (kiwi code 73) and 1997 (kiwi code AT5 and 16-12) in 'operation nest egg' carried out by Rainbow and Fairy Springs, Rotorua. The genome was assembled with iwi approval.

**A**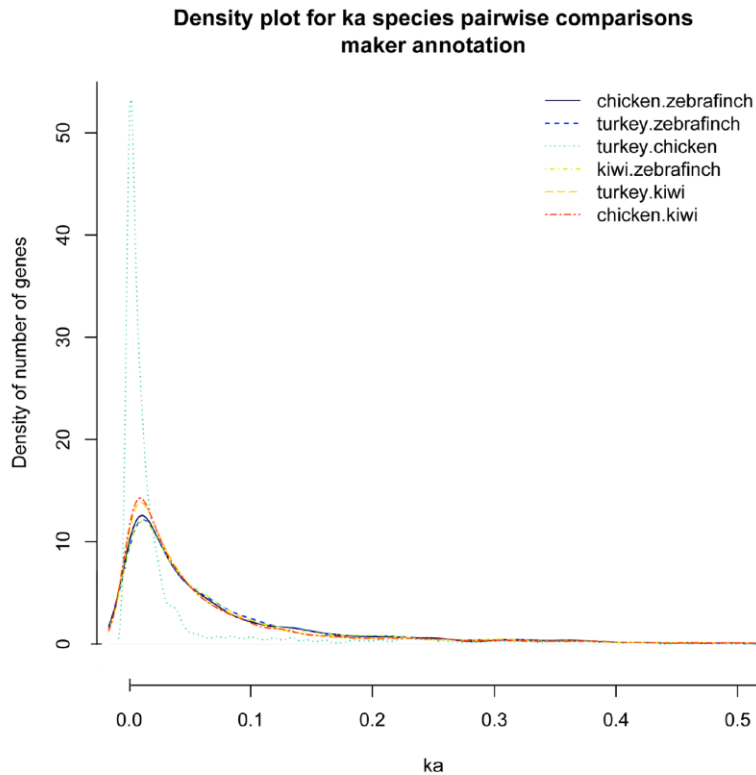**B**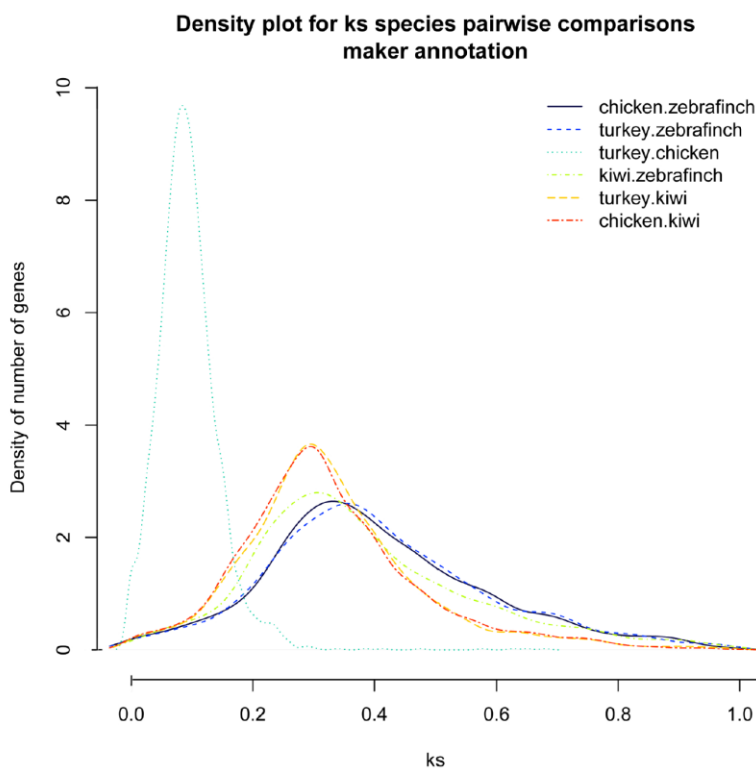

**Supplementary Fig. S11.** Distribution of (A) Ka and (B) Ks on the set of 3,754 orthologous genes in chicken, zebra finch, turkey, and kiwi, which presented no frame shifting indels after multiple sequence alignment. Ka values are much lower than Ks, confirming that non-synonymous mutations occur with a lower frequency.



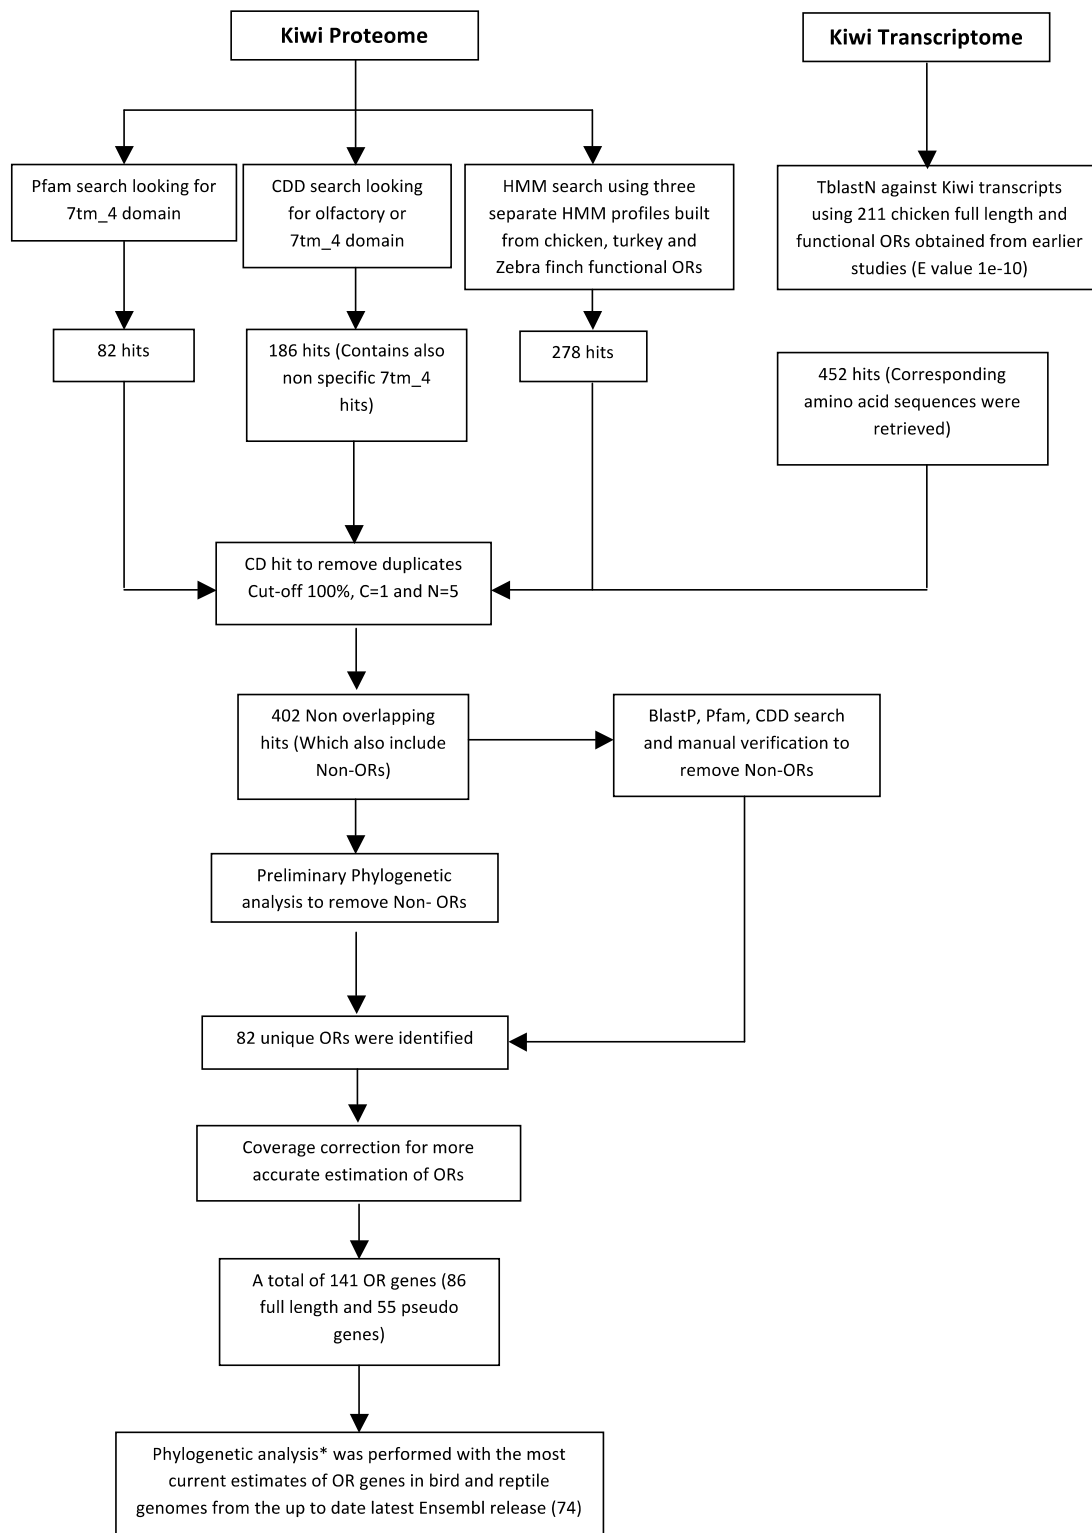

**Supplementary Fig. S12.** Flowchart depicting the olfactory receptors annotation process. \* For phylogenetic analysis (see Figure 3), we downloaded all bird and reptile genomes present in Ensembl 74 [16] and ostrich, tinamou, barn owl, and chuck-will's-widow from GigaDB [17]. ORs for all investigated genomes were annotated using the same approach mentioned in the flowchart. The major difference from previous estimates (Ensembl 73) was found in the estimates for chicken, where, after curation, most of the artificial duplicates that had been mapped on the chromosome 'unknown' were removed. Thus, for phylogeny analysis, the estimates from the Ensemble 74 for all bird and reptile genomes were kept (see Figure 3).

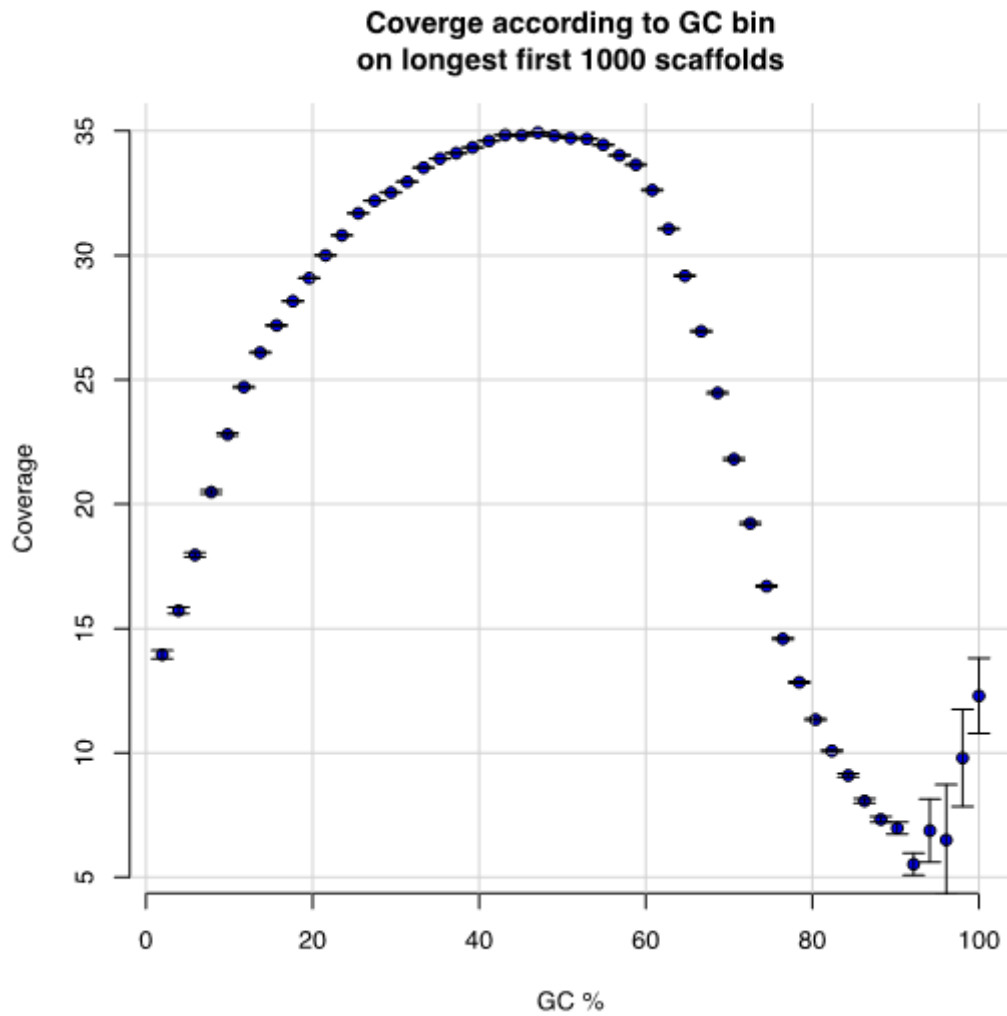

**Supplementary Fig. S13.** Mean coverage for GC content calculated after realigning error-corrected reads from short-insert-size libraries to the 1,000 longest scaffolds of the assembled genome. Error bars represent 95% binomial confidence intervals. Coverage for regions with GC content between 25% and 62% correspond to the coverage observed genome wide (35.85-fold).

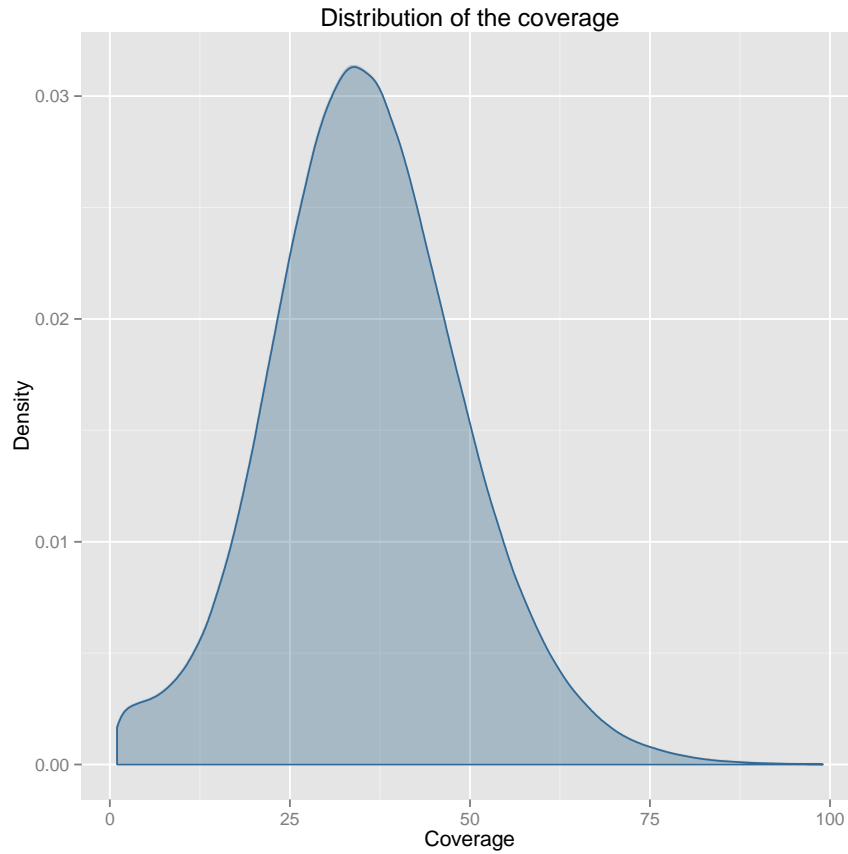

**Supplementary Fig. S14.** Coverage density distribution calculated after realigning short-insert-size libraries reads to the assembled genome. The figure shows the distribution on a subset of 1% of the data by using only reads that mapped to the first 1,000 longest scaffolds and filtered for a mapping quality higher than 30. The mean coverage is 35.85-fold.

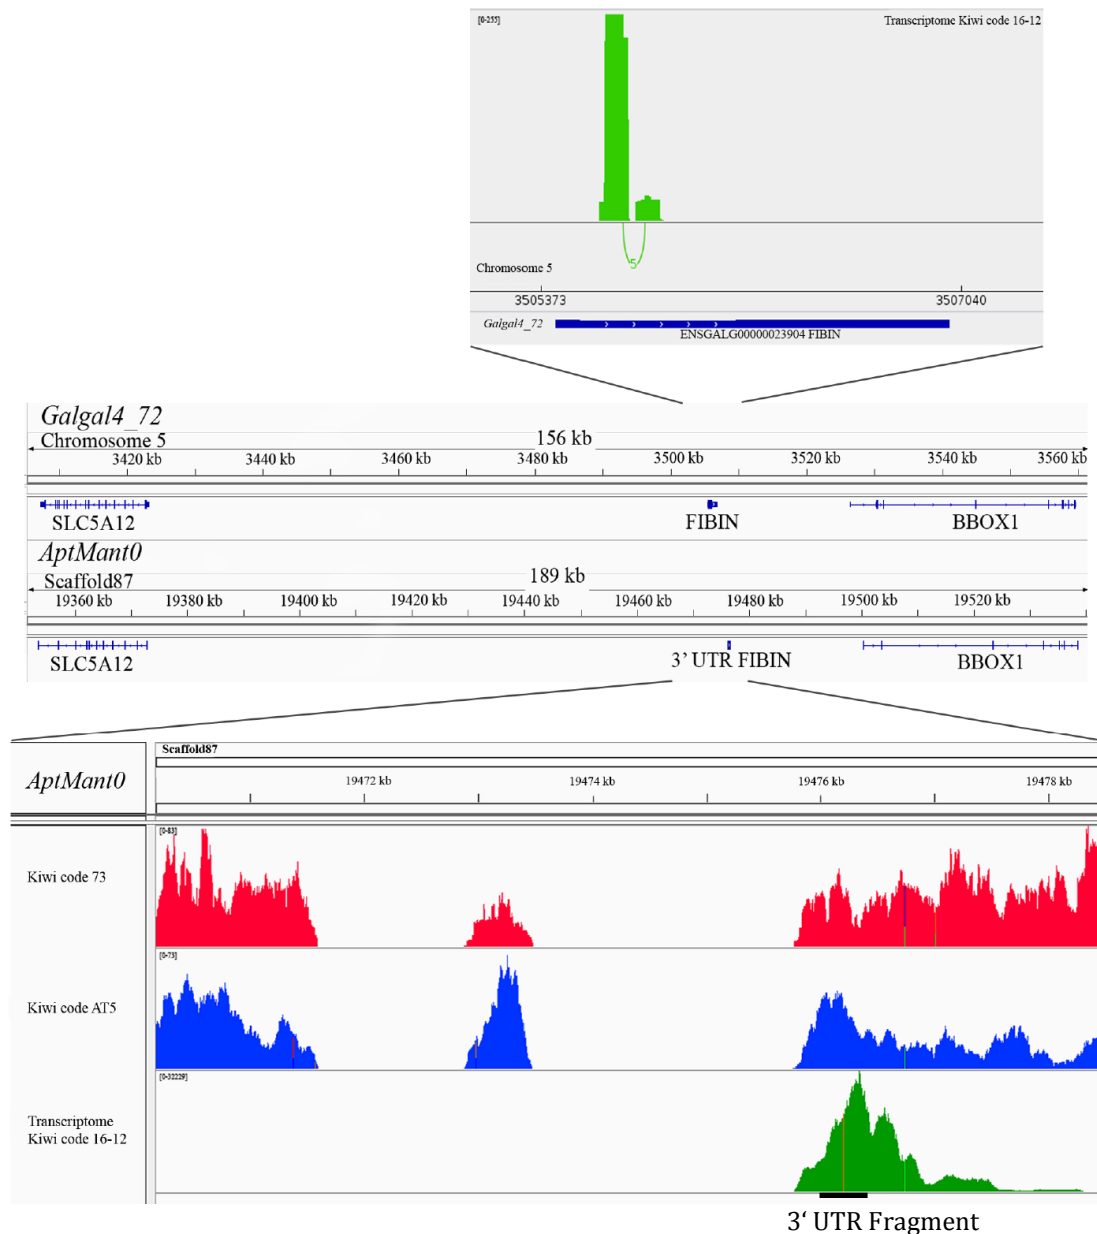

**Supplementary Fig. S15.** Schematic view of *fibin* region coverage. The upper box (A) shows transcriptomic reads (kiwi code 16-12) aligned to the chicken genome (Galgal4\_72). (B) Comparison of the *fibin* gene region between *Gallus gallus* and *Apteryx mantelli*. The synteny and physical distances between genes are conserved in both species. The lower box (C) shows genomic coverage on scaffold87 in the 3' UTR *fibin* region. For primer sequences used to amplify the *fibin* coding sequence refer to Supplementary Table S14.

## Supplementary Tables

### **Supplementary Table S1.** Overview of generated sequencing data

<sup>1</sup> Library sequenced on Illumina MySeq Technology with paired-end reads 76 bp.

\* Reads from individual AT5 were used only for estimating heterozygosity and were not included in the genome assembly.

\*\* Reads from mate-paired-end libraries were used only for scaffolding and are not part of the consensus sequence.

---

| <b>Insert size</b> | <b>Raw data (Gb)</b> | <b>Data used for contig assembly (Gb)</b> | <b>Kiwi individual code</b> |
|--------------------|----------------------|-------------------------------------------|-----------------------------|
| 350                | 45.99                | *                                         | AT5                         |
| 240                | 42.88                | 30.54                                     | 73                          |
| 420                | 32.56                | 16.7                                      | 73                          |
| 800                | 7.28                 | 5.29                                      | 73                          |
| 2,000 <sup>1</sup> | 0.75                 | **                                        | 73                          |
| 3,000              | 14.13                | **                                        | 73                          |
| 4,000              | 15.97                | **                                        | 73                          |
| 7,000              | 4.39                 | **                                        | 16-12                       |
| 9,000              | 2.76                 | **                                        | 16-12                       |
| 11,000             | 46.85                | **                                        | 16-12                       |
| 13,000             | 35.83                | **                                        | 16-12                       |
| <b>Sum</b>         | <b>249.39</b>        | <b>52.53</b>                              |                             |

---

**Supplementary Table S2.** SOAP *de novo* assembly metrics after stepwise inclusion of different insert size library data.

| <b>Step</b> | <b>Library</b>            | <b>N50 (bp)</b> | <b>N90 (bp)</b> | <b>Average length (bp)</b> | <b>Longest scaffold (bp)</b> | <b>Total length (bp)</b> |
|-------------|---------------------------|-----------------|-----------------|----------------------------|------------------------------|--------------------------|
| Contig      | 240, 420, 800 (corrected) | 1,550           | 281             | 731                        | 22,713                       | 1,226,568,938            |
| Scaffold 1  | 240                       | 13,640          | 1,143           | 5,190                      | 170,761                      | 1,173,734,991            |
| Scaffold 2  | 420                       | 25,945          | 1,946           | 7,651                      | 322,977                      | 1,253,654,343            |
| Scaffold 3  | 800                       | 31,909          | 2,394           | 8,887                      | 368,910                      | 1,285,674,594            |
| Scaffold 4  | 2,000                     | 32,914          | 2,581           | 9,705                      | 368,990                      | 1,285,409,640            |
| Scaffold 5  | 3,000                     | 66,802          | 4,737           | 14,334                     | 969,600                      | 1,436,782,364            |
| Scaffold 6  | 4,000                     | 154,116         | 9,567           | 20,545                     | 3,273,144                    | 1,541,358,432            |
| Scaffold 7  | 7,000                     | 377,029         | 13,316          | 23,816                     | 4,665,740                    | 1,565,824,628            |
| Scaffold 8  | 9,000                     | 931,848         | 17,816          | 26,056                     | 11,355,285                   | 1,582,473,408            |
| Scaffold 9  | 11,000                    | 3,663,049       | 29,572          | 33,089                     | 38,853,025                   | 1,662,413,992            |
| Scaffold10  | 13,000                    | 5,026,352       | 35,043          | 37,585                     | 73,122,679                   | 1,747,282,849            |

**Supplementary Table S3.** Assembly metrics after gap closing (*AptMant0*).

---

|                                                            |               |
|------------------------------------------------------------|---------------|
| Assumed genome size (bp)                                   | 1,650,000,000 |
| Number of scaffolds                                        | 326,827       |
| Total size of scaffolds (bp)                               | 1,595,278,775 |
| Total scaffold length as percentage of assumed genome size | 96.68%        |
| Longest scaffold (bp)                                      | 63,182,071    |
| Number of scaffolds > 1K nt                                | 24,710        |
| Number of scaffolds > 10K nt                               | 6,641         |
| Number of scaffolds > 100K nt                              | 1,040         |
| Number of scaffolds > 1M nt                                | 221           |
| Number of scaffolds > 10M nt                               | 32            |
| N50 scaffold length (bp)                                   | 3,956,354     |
| Scaffold %A                                                | 25            |
| Scaffold %C                                                | 18            |
| Scaffold %G                                                | 18            |
| Scaffold %T                                                | 25            |
| Scaffold %N                                                | 13            |
| Number of contigs                                          | 508,831       |
| Total size of contigs                                      | 1,382,272,215 |
| Longest contig                                             | 166,809       |
| Number of contigs > 1K nt                                  | 146,153       |
| Number of contigs > 10K nt                                 | 40,984        |
| Number of contigs > 100K nt                                | 69            |
| Number of contigs > 1M nt                                  | 0             |
| N50 contig length                                          | 16,480        |

---

**Supplementary Table S4.** Genome sizes (A) calculated according to the C-value estimates. (<http://www.genomesize.com>) and (B) assembled in the Avian Phylogenomics Project (<http://avian.genomics.cn/en/>).

A)

| Species                              | Common name               | C value (pg)     | Estimated genome size (Gb) |
|--------------------------------------|---------------------------|------------------|----------------------------|
| <i>Apteryx mantelli</i>              | Kiwi                      |                  | 1.65                       |
| <i>Struthio camelus</i>              | Ostrich                   | 2.16             | 2.11                       |
| <i>Dromaius novaehollandiae</i>      | Emu                       | 1.55             | 1.52                       |
| <i>Crypturellus obsoletus</i>        | Brown tinamou             | 1.35             | 1.33                       |
| <i>Meleagris gallopavo</i>           | Turkey                    | 1.31             | 1.28                       |
| <i>Gallus domesticus</i>             | Domestic chicken          | 1.25             | 1.22                       |
| <i>Taeniopygia guttata</i>           | Zebra finch               | 1.25             | 1.22                       |
| <i>Archilochus alexandri</i>         | Black-chinned hummingbird | 0.91             | 0.89                       |
| <b>Average over 358 bird species</b> |                           | <b>1.38±0.01</b> | <b>1.35</b>                |

B)

| Species                         | Common name             | Size of assembly (Gb) | N50    |
|---------------------------------|-------------------------|-----------------------|--------|
| <i>Haliaeetus leucocephalus</i> | Bald eagle              | 1.26                  | 670 kb |
| <i>Aptenodytes forsteri</i>     | Emperor penguin         | 1.26                  | 5.1 Mb |
| <i>Struthio camelus</i>         | Common ostrich          | 1.23                  | 3.5 Mb |
| <i>Pygoscelis adeliae</i>       | Adelie penguin          | 1.23                  | 5.0 Mb |
| <i>Taeniopygia guttata</i>      | Zebra finch             | 1.2                   | 10 Mb  |
| <i>Egretta garzetta</i>         | Little egret            | 1.2                   | 3.1 Mb |
| <i>Charadrius vociferus</i>     | Killdeer                | 1.2                   | 3.6 Mb |
| <i>Falco peregrinus</i>         | Peregrine falcon        | 1.18                  | 3.9 Mb |
| <i>Tauraco erythrolophus</i>    | Red-crested turaco      | 1.17                  | 55 kb  |
| <i>Picoides pubescens</i>       | Downy woodpecker        | 1.17                  | 2 Mb   |
| <i>Pelecanus crispus</i>        | Dalmatian pelican       | 1.17                  | 43 kp  |
| <i>Nipponia nippon</i>          | Crested ibis            | 1.17                  | 5.4 Mp |
| <i>Cathartes aura</i>           | Turkey vulture          | 1.17                  | 35 kb  |
| <i>Phaethon lepturus</i>        | White-tailed tropicbird | 1.16                  | 47 kb  |
| <i>Podiceps cristatus</i>       | Great-crested grebe     | 1.15                  | 30 kb  |
| <i>Phalacrocorax carbo</i>      | Great cormorant         | 1.15                  | 48 kb  |
| <i>Leptosomus discolor</i>      | Cuckoo-roller           | 1.15                  | 61 kb  |
| <i>Gavia stellata</i>           | Red-throated loon       | 1.15                  | 45 kb  |
| <i>Cuculus canorus</i>          | Common cuckoo           | 1.15                  | 3 Mb   |
| <i>Cariama cristata</i>         | Red-legged seriema      | 1.15                  | 54 kb  |
| <i>Antrostomus carolinensis</i> | Chuck-will's-widow      | 1.15                  | 45 kb  |
| <i>Tyto alba</i>                | Barn owl                | 1.14                  | 51 kb  |
| <i>Phoenicopterus ruber</i>     | American flamingo       | 1.14                  | 37 kb  |



| <b>Species</b>                 | <b>Common name</b>  | <b>Size of assembly (Gb)</b> | <b>N50</b> |
|--------------------------------|---------------------|------------------------------|------------|
| <i>Ophithocomus hoazin</i>     | Hoatzin             | 1.14                         | 2.9 Mb     |
| <i>Nestor notabilis</i>        | Kea                 | 1.14                         | 37 kb      |
| <i>Haliaeetus albicilla</i>    | White-tailed eagle  | 1.14                         | 56 kb      |
| <i>Fulmarus glacialis</i>      | Northern fulmar     | 1.14                         | 46 kb      |
| <i>Balearica regulorum</i>     | Grey-crowned crane  | 1.14                         | 51 kb      |
|                                | Golden-collared     |                              |            |
| <i>Manacus vitellinus</i>      | manakin             | 1.12                         | 2.5 Mb     |
| <i>Columba livia</i>           | Pigeon              | 1.11                         | 3.2 Mb     |
| <i>Mesitornis unicolor</i>     | Brown mesite        | 1.1                          | 46 kb      |
| <i>Melopsittacus undulatus</i> | Budgerigar          | 1.1                          | 10.6 Mb    |
| <i>Eurypyga helias</i>         | Sunbittern          | 1.1                          | 46 kb      |
| <i>Corvus brachyrhynchos</i>   | American crow       | 1.1                          | 6.9 Mb     |
| <i>Chaetura pelagica</i>       | Chimney swift       | 1.1                          | 3.8 Mb     |
|                                | Anna's              |                              |            |
| <i>Calypte anna</i>            | hummingbird         | 1.1                          | 4 Mb       |
| <i>Anas platyrhynchos</i>      | Peking duck         | 1.1                          | 1.2 Mb     |
| <i>Chlamydotis macqueenii</i>  | Macqueen's bustard  | 1.09                         | 45 kb      |
| <i>Colius striatus</i>         | Speckled mousebird  | 1.08                         | 45 kb      |
| <i>Buceros rhinoceros</i>      | Rhinoceros hornbill | 1.08                         | 51 kb      |
| <i>Apaloderma vittatum</i>     | Bar-tailed trogon   | 1.08                         | 56 kb      |
|                                | Yellow-thoated      |                              |            |
| <i>Pterocles gutturalis</i>    | sandgrouse          | 1.07                         | 49 kb      |
|                                | Medium ground       |                              |            |
| <i>Geospiza fortis</i>         | finch               | 1.07                         | 5.2 Mb     |
| <i>Merops nubicus</i>          | Carmine bee-eater   | 1.06                         | 47 kb      |
|                                | White-throated      |                              |            |
| <i>Tinamus guttatus</i>        | tinamou             | 1.05                         | 242 kb     |
| <i>Gallus gallus</i>           | Chicken             | 1.05                         | 7.07 Mb    |
| <i>Acanthisitta chloris</i>    | Rifleman            | 1.05                         | 64 kb      |
| <i>Meleagris gallopavo</i>     | Turkey              | 1.04                         | 1.5 Mb     |

**Supplementary Table S5.** Statistics for chaining of the *AptMant0* assembly to the (A) chicken and (B) zebra finch chromosomes respectively.

A)

| <b>Chicken chromosome</b> | <b>Chromosome size</b> | <b>Chained sequence</b> | <b>Percentage covered</b> | <b>Different sites</b> | <b>Percentage difference</b> |
|---------------------------|------------------------|-------------------------|---------------------------|------------------------|------------------------------|
| 1                         | 195,276,750            | 155,364,546             | 79.56                     | 38,041,358             | 24.49                        |
| 2                         | 148,809,762            | 119,829,029             | 80.53                     | 29,079,104             | 24.27                        |
| 3                         | 110,447,801            | 90,986,045              | 82.38                     | 21,964,886             | 24.14                        |
| 4                         | 90,216,835             | 73,355,842              | 81.31                     | 17,952,272             | 24.47                        |
| 5                         | 59,580,361             | 49,279,180              | 82.71                     | 11,716,073             | 23.77                        |
| 6                         | 34,951,654             | 28,482,813              | 81.49                     | 6,922,076              | 24.30                        |
| 7                         | 36,245,040             | 30,381,351              | 83.82                     | 7,225,727              | 23.78                        |
| 8                         | 28,767,244             | 23,701,768              | 82.39                     | 5,608,128              | 23.66                        |
| 9                         | 23,441,680             | 19,428,562              | 82.88                     | 4,710,455              | 24.25                        |
| 10                        | 19,911,089             | 16,608,908              | 83.42                     | 3,874,140              | 23.33                        |
| 11                        | 19,401,079             | 16,287,461              | 83.95                     | 3,714,888              | 22.81                        |
| 12                        | 19,897,011             | 16,543,187              | 83.14                     | 3,950,557              | 23.88                        |
| 13                        | 17,760,035             | 14,547,755              | 81.91                     | 3,553,626              | 24.43                        |
| 14                        | 15,161,805             | 12,272,985              | 80.95                     | 2,971,220              | 24.21                        |
| 15                        | 12,656,803             | 10,445,778              | 82.53                     | 2,422,682              | 23.19                        |
| 16                        | 535,270                | 138,258                 | 25.83                     | 40,898                 | 29.58                        |
| 17                        | 10,454,150             | 8,462,801               | 80.95                     | 1,973,263              | 23.32                        |
| 18                        | 11,219,875             | 8,968,833               | 79.94                     | 2,151,082              | 23.98                        |
| 19                        | 9,983,394              | 7,880,147               | 78.93                     | 1,837,173              | 23.31                        |
| 20                        | 14,302,601             | 11,531,740              | 80.63                     | 2,762,076              | 23.95                        |
| 21                        | 6,802,778              | 5,144,080               | 75.62                     | 1,206,947              | 23.46                        |
| 22                        | 4,081,097              | 2,979,422               | 73.01                     | 704,872                | 23.66                        |
| 23                        | 5,723,239              | 4,245,544               | 74.18                     | 1,023,977              | 24.12                        |
| 24                        | 6,323,281              | 4,905,374               | 77.58                     | 1,167,829              | 23.81                        |
| 25                        | 2,191,139              | 1,233,391               | 56.29                     | 317,079                | 25.71                        |
| 26                        | 5,329,985              | 3,870,041               | 72.61                     | 957,303                | 24.74                        |
| 27                        | 5,209,285              | 3,195,539               | 61.34                     | 807,582                | 25.27                        |
| 28                        | 4,742,627              | 3,080,012               | 64.94                     | 735,990                | 23.90                        |
| M                         | 16,775                 | 15,221                  | 90.74                     | 3,403                  | 22.36                        |
| W                         | 1,248,174              | 334,909                 | 26.83                     | 97,280                 | 29.05                        |
| Z                         | 82,363,669             | 55,592,343              | 67.50                     | 14,484,655             | 26.06                        |
| <b>Total</b>              | <b>1,003,052,288</b>   | <b>799,092,865</b>      | <b>79.67</b>              | <b>193,978,601</b>     | <b>24.27</b>                 |

B)

| <b>Zebra finch chromosome</b> | <b>Chromosome size</b> | <b>Chained sequence</b> | <b>Percentage covered</b> | <b>Different sites</b> | <b>Percentage difference</b> |
|-------------------------------|------------------------|-------------------------|---------------------------|------------------------|------------------------------|
| 1                             | 118,548,696            | 95,588,030              | 80.63                     | 23,621,907             | 24.71                        |
| 1A                            | 73,657,157             | 60,848,047              | 82.61                     | 14,881,959             | 24.46                        |
| 1B                            | 1,083,483              | 517,521                 | 47.76                     | 142,769                | 27.59                        |
| 2                             | 156,412,533            | 126,553,387             | 80.91                     | 30,948,025             | 24.45                        |
| 3                             | 112,617,285            | 92,496,642              | 82.13                     | 22,480,218             | 24.30                        |
| 4                             | 69,780,378             | 56,292,102              | 80.67                     | 13,944,087             | 24.77                        |
| 4A                            | 20,704,505             | 16,075,521              | 77.64                     | 3,968,127              | 24.68                        |
| 5                             | 62,374,962             | 50,105,661              | 80.33                     | 12,040,151             | 24.03                        |
| 6                             | 36,305,782             | 29,094,931              | 80.14                     | 7,011,544              | 24.10                        |
| 7                             | 39,844,632             | 32,173,733              | 80.75                     | 7,737,045              | 24.05                        |
| 8                             | 27,993,427             | 22,620,918              | 80.81                     | 5,357,610              | 23.68                        |
| 9                             | 27,241,186             | 21,639,691              | 79.44                     | 5,349,694              | 24.72                        |
| 10                            | 20,806,668             | 17,088,758              | 82.13                     | 4,017,138              | 23.51                        |
| 11                            | 21,403,021             | 17,155,722              | 80.16                     | 4,043,564              | 23.57                        |
| 12                            | 21,576,510             | 17,301,317              | 80.19                     | 4,219,639              | 24.39                        |
| 13                            | 16,962,381             | 13,449,468              | 79.29                     | 3,309,012              | 24.60                        |
| 14                            | 16,419,078             | 12,812,141              | 78.03                     | 3,143,441              | 24.53                        |
| 15                            | 14,428,146             | 11,071,597              | 76.74                     | 2,649,060              | 23.93                        |
| 16                            | 9,909                  | 196                     | 1.98                      | 14                     | 7.14                         |
| 17                            | 11,648,728             | 8,750,950               | 75.12                     | 2,098,487              | 23.98                        |
| 18                            | 11,201,131             | 8,232,172               | 73.49                     | 2,036,004              | 24.73                        |
| 19                            | 11,587,733             | 8,528,917               | 73.60                     | 2,062,133              | 24.18                        |
| 20                            | 15,652,063             | 11,894,185              | 75.99                     | 2,910,542              | 24.47                        |
| 21                            | 5,979,137              | 4,062,176               | 67.94                     | 1,004,306              | 24.72                        |
| 22                            | 3,370,227              | 1,927,566               | 57.19                     | 504,101                | 26.15                        |
| 23                            | 6,196,912              | 3,820,547               | 61.65                     | 965,711                | 25.28                        |
| 24                            | 8,021,379              | 4,950,626               | 61.72                     | 1,268,459              | 25.62                        |
| 25                            | 1,275,379              | 594,306                 | 46.60                     | 158,546                | 26.68                        |
| 26                            | 4,907,541              | 3,060,663               | 62.37                     | 800,428                | 26.15                        |
| 27                            | 4,618,897              | 2,659,963               | 57.59                     | 703,489                | 26.45                        |
| 28                            | 4,963,201              | 2,980,655               | 60.06                     | 748,802                | 25.12                        |
| MT                            | 16,853                 | 14,879                  | 88.29                     | 3,387                  | 22.76                        |
| Un                            | 175,225,315            | 113,600,653             | 64.83                     | 28,906,824             | 25.45                        |
| Z                             | 72,861,351             | 51,784,845              | 71.07                     | 13,554,298             | 26.17                        |
| <b>Total</b>                  | <b>1,195,695,586</b>   | <b>919,748,486</b>      | <b>76.92</b>              | <b>226,590,521</b>     | <b>24.64</b>                 |

**Supplementary Table S6.** Gene families (TreeFam [18]) with significant difference in size on *Apteryx mantelli* branch (p-value < 0.005, as tested by CAFE [2]).

*G.a.* = *Gasterosteus aculeatus*, *A.c.* = *Anolis carolinensis*, *P.c.* = *Pelodiscus sinensis*, *H.s.* = *Homo sapiens*, *M.m.* = *Mus musculus*, *O.a.* = *Ornithorhynchus anatinus*, *G.g.* = *Gallus gallus*, *A.p.* = *Anas platyrhynchos*, *M.g.* = *Meleagris gallopavo*, *T.g.* = *Taeniopygia guttata*, *F.a.* = *Ficedula albicollis*, *A.cs.* = *Antristomus carolinensis*, *T.a.* = *Tyto alba*, *A.m.* = *Apteryx mantelli*, *S.c.* = *Struthio camelus*, *T.gt.* = *Tinamus guttatus*, *A.m.\** = *Apteryx mantelli* manually curated.

Presented Pfam ID is the one with highest percentage of hits for the respective TreeFam gene family.

**Families expanded in *Apteryx mantelli***

| Description                                             | TreeFam ID | Pfam ID | <i>G.a.</i> | <i>A.c.</i> | <i>P.s.</i> | <i>H.s.</i> | <i>M.m.</i> | <i>O.a.</i> | <i>G.g.</i> | <i>A.p.</i> | <i>M.g.</i> | <i>T.g.</i> | <i>F.a.</i> | <i>A.cs.</i> | <i>T.a.</i> | <i>A.m.</i> | <i>S.c.</i> | <i>T.gt.</i> | <i>A.m.*</i> |
|---------------------------------------------------------|------------|---------|-------------|-------------|-------------|-------------|-------------|-------------|-------------|-------------|-------------|-------------|-------------|--------------|-------------|-------------|-------------|--------------|--------------|
| Protein phosphatase 1, regulatory (inhibitor) subunit 9 | TF105540   | PF00595 | 5           | 3           | 3           | 2           | 2           | 7           | 2           | 3           | 2           | 2           | 2           | 2            | 2           | 8           | 1           | 2            | 4            |
| E1A-binding protein p400/Snf2-related CBP activator     | TF106424   | PF00176 | 2           | 2           | 2           | 2           | 3           | 5           | 1           | 1           | 1           | 2           | 1           | 3            | 2           | 9           | 1           | 1            | 3            |
| Carbohydrate phosphorylase                              | TF300309   | PF00343 | 3           | 3           | 2           | 3           | 3           | 6           | 2           | 2           | 3           | 2           | 2           | 2            | 0           | 7           | 1           | 2            | 3            |
| Protein of unknown function (DUF1162)                   | TF300316   | PF06650 | 2           | 2           | 2           | 1           | 1           | 7           | 1           | 4           | 3           | 3           | 2           | 1            | 3           | 8           | 2           | 2            | 5            |
| Dynamin central region                                  | TF300362   | PF01031 | 5           | 2           | 3           | 3           | 3           | 5           | 3           | 4           | 2           | 4           | 3           | 5            | 3           | 10          | 3           | 3            | 4            |

| <b>Description</b>                                               | <b>TreeFam ID</b> | <b>Pfam ID</b> | <b>G.a.</b> | <b>A.c.</b> | <b>P.s.</b> | <b>H.s.</b> | <b>M.m.</b> | <b>O.a.</b> | <b>G.g.</b> | <b>A.p.</b> | <b>M.g.</b> | <b>T.g.</b> | <b>F.a.</b> | <b>A.cs.</b> | <b>T.a.</b> | <b>A.m.</b> | <b>S.c.</b> | <b>T.gt.</b> | <b>A.m.*</b> |
|------------------------------------------------------------------|-------------------|----------------|-------------|-------------|-------------|-------------|-------------|-------------|-------------|-------------|-------------|-------------|-------------|--------------|-------------|-------------|-------------|--------------|--------------|
| GTPase-activator protein for Ras-like GTPase                     | TF313078          | PF00616        | 3           | 2           | 4           | 3           | 3           | 8           | 2           | 4           | 3           | 3           | 3           | 2            | 2           | 11          | 3           | 3            | 10           |
| Ion channel family                                               | TF313555          | PF00520        | 6           | 5           | 3           | 3           | 3           | 7           | 3           | 4           | 3           | 4           | 3           | 3            | 3           | 11          | 3           | 2            | 4            |
| Calcium-activated BK potassium channel alpha subunit             | TF314283          | PF03493        | 5           | 4           | 4           | 4           | 4           | 14          | 4           | 4           | 4           | 3           | 3           | 2            | 2           | 11          | 4           | 4            | 5            |
| HEAT repeat domain                                               | TF315201          | PF02985        | 0           | 4           | 1           | 4           | 3           | 3           | 2           | 1           | 2           | 1           | 2           | 1            | 0           | 5           | 1           | 1            | 5            |
| GHH signature containing HNH/Endo VII superfamily nuclease toxin | TF316833          | PF15636        | 5           | 4           | 3           | 4           | 4           | 10          | 4           | 4           | 6           | 4           | 4           | 5            | 4           | 11          | 4           | 3            | 5            |
| TPR repeat                                                       | TF323569          | PF13414        | 1           | 1           | 1           | 2           | 1           | 6           | 1           | 1           | 2           | 2           | 2           | 1            | 1           | 5           | 1           | 1            | 5            |
| Helicase conserved C-terminal domain                             | TF324610          | PF00271        | 1           | 1           | 1           | 2           | 1           | 1           | 1           | 1           | 1           | 1           | 1           | 0            | 1           | 6           | 1           | 0            | 4            |
| Pleckstrin homology domain                                       | TF329258          | PF00169        | 5           | 1           | 1           | 1           | 1           | 3           | 1           | 1           | 2           | 2           | 1           | 1            | 0           | 6           | 1           | 1            | 2            |
| Zinc finger, C3HC4 type (RING finger)                            | TF329577          | PF13923        | 2           | 2           | 1           | 0           | 0           | 2           | 0           | 1           | 1           | 2           | 0           | 1            | 1           | 11          | 1           | 1            | 6            |

| <b>Description</b>                         | <b>TreeFam ID</b> | <b>Pfam ID</b> | <b>G.a.</b> | <b>A.c.</b> | <b>P.s.</b> | <b>H.s.</b> | <b>M.m.</b> | <b>O.a.</b> | <b>G.g.</b> | <b>A.p.</b> | <b>M.g.</b> | <b>T.g.</b> | <b>F.a.</b> | <b>A.cs.</b> | <b>T.a.</b> | <b>A.m.</b> | <b>S.c.</b> | <b>T.gt.</b> | <b>A.m.*</b> |
|--------------------------------------------|-------------------|----------------|-------------|-------------|-------------|-------------|-------------|-------------|-------------|-------------|-------------|-------------|-------------|--------------|-------------|-------------|-------------|--------------|--------------|
| Sodium:neurotransmitter symporter family   | TF342680          | PF00209        | 8           | 4           | 3           | 6           | 5           | 8           | 5           | 3           | 5           | 5           | 4           | 4            | 4           | 11          | 4           | 3            | 10           |
| Sea anemone cytotoxic protein              | TF344188          | PF06369        | 3           | 0           | 0           | 0           | 0           | 1           | 1           | 1           | 0           | 0           | 0           | 0            | 0           | 5           | 1           | 1            | 3            |
| RhoGEF domain                              | TF351276          | PF00621        | 3           | 2           | 3           | 2           | 2           | 2           | 2           | 2           | 5           | 4           | 2           | 3            | 2           | 7           | 2           | 2            | 4            |
| SH2 domain                                 | TF354288          | PF00017        | 5           | 5           | 5           | 6           | 5           | 8           | 6           | 6           | 6           | 5           | 4           | 7            | 4           | 12          | 4           | 4            | 12           |
| Vinculin family                            | TF313686          | PF01044        | 5           | 7           | 9           | 6           | 6           | 13          | 7           | 6           | 8           | 7           | 6           | 4            | 7           | 13          | 6           | 6            | 8            |
| RIH domain                                 | TF312815          | PF01365        | 4           | 3           | 5           | 3           | 3           | 15          | 3           | 3           | 4           | 5           | 3           | 4            | 6           | 10          | 4           | 5            | 5            |
| Filamin/ABP2 80 repeat                     | TF313685          | PF00630        | 5           | 4           | 3           | 4           | 3           | 5           | 1           | 3           | 1           | 2           | 2           | 1            | 1           | 6           | 1           | 1            | 4            |
| G8 domain                                  | TF316575          | PF10162        | 2           | 2           | 3           | 2           | 2           | 8           | 3           | 3           | 4           | 2           | 2           | 3            | 3           | 9           | 4           | 3            | 7            |
| Putative GTPase activating protein for Arf | TF325156          | PF01412        | 4           | 4           | 4           | 3           | 12          | 8           | 5           | 5           | 4           | 3           | 3           | 2            | 2           | 9           | 3           | 4            | 6            |
| CAP-Gly domain                             | TF326096          | PF01302        | 5           | 4           | 4           | 5           | 4           | 8           | 3           | 3           | 4           | 4           | 3           | 5            | 2           | 9           | 3           | 4            | 5            |
| Hsp70 protein                              | TF329492          | PF00012        | 2           | 2           | 5           | 3           | 2           | 3           | 2           | 3           | 2           | 3           | 2           | 2            | 2           | 6           | 1           | 2            | 4            |
| Calponin homology domain                   | TF329881          | PF00307        | 4           | 2           | 1           | 1           | 1           | 5           | 1           | 2           | 2           | 1           | 1           | 0            | 2           | 6           | 1           | 2            | 3            |
| Ankyrin repeats (3 copies)                 | TF344032          | PF12796        | 2           | 4           | 4           | 3           | 3           | 4           | 2           | 3           | 2           | 1           | 3           | 2            | 2           | 6           | 1           | 1            | 2            |
| Homeobox domain                            | TF350571          | PF00046        | 15          | 7           | 8           | 19          | 12          | 8           | 4           | 5           | 4           | 6           | 5           | 4            | 3           | 11          | 5           | 5            | 9            |
| Cadherin domain                            | TF331809          | PF00028        | 13          | 7           | 11          | 14          | 15          | 12          | 7           | 8           | 6           | 5           | 10          | 6            | 5           | 12          | 6           | 6            | 8            |

| <b>Description</b>                                                               | <b>TreeFam ID</b> | <b>Pfam ID</b> | <i>G.a.</i> | <i>A.c.</i> | <i>P.s.</i> | <i>H.s.</i> | <i>M.m.</i> | <i>O.a.</i> | <i>G.g.</i> | <i>A.p.</i> | <i>M.g.</i> | <i>T.g.</i> | <i>F.a.</i> | <i>A.cs.</i> | <i>T.a.</i> | <i>A.m.</i> | <i>S.c.</i> | <i>T.gt.</i> | <i>A.m.*</i> |
|----------------------------------------------------------------------------------|-------------------|----------------|-------------|-------------|-------------|-------------|-------------|-------------|-------------|-------------|-------------|-------------|-------------|--------------|-------------|-------------|-------------|--------------|--------------|
| Epidermal growth factor receptor/v-erb-b2 erythroblastic leukemia viral oncogene | TF106002          | PF01030        | 7           | 4           | 4           | 4           | 5           | 9           | 3           | 3           | 5           | 5           | 3           | 2            | 3           | 7           | 2           | 3            | 4            |
| BAR domain                                                                       | TF313542          | PF03114        | 4           | 3           | 3           | 3           | 3           | 3           | 3           | 2           | 6           | 3           | 3           | 2            | 3           | 7           | 2           | 2            | 4            |
| Beige/BEACH domain                                                               | TF313658          | PF02138        | 3           | 2           | 3           | 2           | 2           | 8           | 3           | 2           | 3           | 4           | 2           | 4            | 3           | 7           | 3           | 3            | 4            |
| Ubiquitin                                                                        | TF314412          | PF00240        | 2           | 2           | 4           | 5           | 6           | 1           | 3           | 4           | 2           | 2           | 2           | 2            | 2           | 7           | 3           | 3            | 5            |
| RhoGAP domain                                                                    | TF315892          | PF00620        | 8           | 6           | 3           | 7           | 4           | 11          | 3           | 3           | 2           | 3           | 4           | 3            | 2           | 7           | 2           | 2            | 3            |
| Plasma-membrane choline transporter                                              | TF313325          | PF04515        | 7           | 5           | 5           | 11          | 5           | 12          | 4           | 4           | 3           | 4           | 4           | 3            | 2           | 8           | 3           | 4            | 7            |
| Tubulin/FtsZ family, GTPase domain                                               | TF330882          | PF00091        | 3           | 5           | 7           | 3           | 2           | 3           | 3           | 2           | 2           | 1           | 2           | 2            | 2           | 8           | 4           | 3            | 7            |
| Glycosyl hydrolases family 31                                                    | TF314577          | PF01055        | 3           | 5           | 2           | 6           | 3           | 16          | 4           | 5           | 4           | 7           | 4           | 3            | 3           | 9           | 4           | 5            | 6            |
| von Willebrand factor type D domain                                              | TF343473          | PF00094        | 2           | 3           | 8           | 3           | 4           | 14          | 2           | 2           | 3           | 3           | 2           | 7            | 6           | 9           | 4           | 5            | 8            |
| Coagulation Factor Xa inhibitory site                                            | TF332034          | PF14670        | 2           | 2           | 2           | 2           | 2           | 4           | 2           | 4           | 4           | 3           | 2           | 1            | 1           | 5           | 1           | 2            | 4            |
| Dispanin                                                                         | TF334894          | PF04505        | 1           | 3           | 3           | 5           | 10          | 2           | 4           | 3           | 4           | 2           | 3           | 1            | 0           | 5           | 1           | 2            | 3            |

| <b>Description</b>                       | <b>TreeFam ID</b> | <b>Pfam ID</b> | <b>G.a.</b> | <b>A.c.</b> | <b>P.s.</b> | <b>H.s.</b> | <b>M.m.</b> | <b>O.a.</b> | <b>G.g.</b> | <b>A.p.</b> | <b>M.g.</b> | <b>T.g.</b> | <b>F.a.</b> | <b>A.cs.</b> | <b>T.a.</b> | <b>A.m.</b> | <b>S.c.</b> | <b>T.gt.</b> | <b>A.m.*</b> |
|------------------------------------------|-------------------|----------------|-------------|-------------|-------------|-------------|-------------|-------------|-------------|-------------|-------------|-------------|-------------|--------------|-------------|-------------|-------------|--------------|--------------|
| von Willebrand factor type D domain      | TF336561          | PF00094        | 3           | 4           | 3           | 1           | 2           | 4           | 2           | 3           | 2           | 1           | 2           | 1            | 1           | 5           | 1           | 1            | 2            |
| PDZ domain (Also known as DHR or GLGF)   | TF323171          | PF00595        | 13          | 6           | 8           | 6           | 5           | 13          | 6           | 5           | 8           | 8           | 6           | 6            | 6           | 10          | 6           | 6            | 7            |
| PDZ domain                               | TF330709          | PF00595        | 9           | 5           | 7           | 4           | 4           | 12          | 5           | 5           | 4           | 8           | 5           | 4            | 5           | 10          | 5           | 4            | 7            |
| Est1 DNA/RNA binding domain              | TF327119          | PF10373        | 3           | 5           | 3           | 3           | 3           | 6           | 3           | 3           | 6           | 5           | 4           | 2            | 2           | 6           | 3           | 3            | 4            |
| von Willebrand factor type A domain      | TF329914          | PF00092        | 6           | 5           | 4           | 3           | 3           | 10          | 3           | 3           | 3           | 6           | 3           | 4            | 3           | 7           | 3           | 4            | 5            |
| Helicase associated domain (HA2)         | TF318311          | PF04408        | 2           | 1           | 1           | 1           | 1           | 4           | 1           | 1           | 1           | 7           | 2           | 2            | 3           | 3           | 1           | 1            | 3            |
| Immunoglobulin C1-set domain             | TF334274          | PF07654        | 10          | 1           | 5           | 8           | 2           | 1           | 2           | 1           | 2           | 0           | 0           | 1            | 1           | 3           | 1           | 1            | 3            |
| no description                           | TF336669          | no hits        | 0           | 0           | 0           | 0           | 0           | 4           | 12          | 2           | 7           | 0           | 0           | 0            | 0           | 3           | 1           | 1            | 3            |
| Function to find                         | TF352798          | PF13553        | 0           | 1           | 7           | 1           | 0           | 0           | 1           | 0           | 2           | 1           | 1           | 1            | 1           | 3           | 1           | 1            | 3            |
| Vault protein inter-alpha-trypsin domain | TF328982          | PF08487        | 7           | 7           | 6           | 6           | 5           | 13          | 4           | 6           | 5           | 5           | 4           | 3            | 2           | 8           | 4           | 4            | 5            |
| O-Glycosyl hydrolase family 30           | TF314254          | PF02055        | 1           | 4           | 0           | 2           | 1           | 0           | 3           | 3           | 0           | 3           | 2           | 1            | 2           | 4           | 1           | 3            | 3            |



| <b>Description</b>                                                  | <b>TreeFam ID</b> | <b>Pfam ID</b> | <b>G.a.</b> | <b>A.c.</b> | <b>P.s.</b> | <b>H.s.</b> | <b>M.m.</b> | <b>O.a.</b> | <b>G.g.</b> | <b>A.p.</b> | <b>M.g.</b> | <b>T.g.</b> | <b>F.a.</b> | <b>A.cs.</b> | <b>T.a.</b> | <b>A.m.</b> | <b>S.c.</b> | <b>T.gt.</b> | <b>A.m.*</b> |
|---------------------------------------------------------------------|-------------------|----------------|-------------|-------------|-------------|-------------|-------------|-------------|-------------|-------------|-------------|-------------|-------------|--------------|-------------|-------------|-------------|--------------|--------------|
| Flagellar-associated<br>PapD-like                                   | TF328687          | PF14874        | 1           | 1           | 2           | 4           | 1           | 6           | 1           | 2           | 1           | 6           | 4           | 0            | 2           | 4           | 1           | 1            | 3            |
| Alpha-2-<br>Macroglobulin                                           | TF335433          | PF00207        | 1           | 1           | 2           | 11          | 1           | 1           | 2           | 3           | 2           | 1           | 2           | 1            | 1           | 4           | 1           | 1            | 4            |
| NACHT<br>domain                                                     | TF340267          | PF05729        | 0           | 4           | 8           | 33          | 20          | 8           | 2           | 2           | 2           | 2           | 2           | 2            | 2           | 4           | 2           | 2            | 4            |
| Kunitz/Bovine<br>pancreatic<br>trypsin<br>inhibitor<br>domain       | TF315349          | PF00014        | 6           | 11          | 5           | 4           | 3           | 2           | 3           | 4           | 4           | 2           | 4           | 1            | 2           | 5           | 2           | 3            | 5            |
| Acetyltransferase (GNAT)<br>family                                  | TF324687          | PF00583        | 4           | 3           | 3           | 2           | 10          | 5           | 1           | 1           | 2           | 0           | 1           | 1            | 1           | 2           | 1           | 1            | 2            |
| DDE<br>superfamily<br>endonuclease                                  | TF327972          | PF13359        | 30          | 2           | 3           | 1           | 1           | 1           | 1           | 1           | 1           | 2           | 2           | 1            | 1           | 2           | 1           | 1            | 2            |
| SET domain<br>containing<br>1A/1B                                   | TF106436          | PF11764        | 3           | 2           | 4           | 2           | 2           | 4           | 1           | 1           | 1           | 5           | 1           | 1            | 2           | 3           | 1           | 1            | 3            |
| Glycosyltransferase sugar-binding region<br>containing<br>DXD motif | TF324053          | PF04488        | 0           | 2           | 15          | 2           | 2           | 2           | 2           | 2           | 2           | 4           | 3           | 3            | 3           | 3           | 2           | 2            | 3            |
| Homeobox<br>domain                                                  | TF351530          | PF00046        | 7           | 3           | 4           | 3           | 3           | 2           | 4           | 2           | 2           | 3           | 5           | 1            | 1           | 3           | 1           | 1            | 3            |
| Transforming<br>growth factor<br>beta superfam.                     | TF351791          | PF00019        | 5           | 3           | 1           | 4           | 4           | 1           | 2           | 3           | 3           | 2           | 4           | 1            | 2           | 3           | 1           | 1            | 3            |

| Description              | TreeFam ID | Pfam ID | G.a. | A.c. | P.s. | H.s. | M.m. | O.a. | G.g. | A.p. | M.g. | T.g. | F.a. | A.cs. | T.a. | A.m. | S.c. | T.gt. | A.m.* |
|--------------------------|------------|---------|------|------|------|------|------|------|------|------|------|------|------|-------|------|------|------|-------|-------|
| Homeobox domain          | TF315976   | PF00046 | 4    | 3    | 3    | 10   | 6    | 3    | 1    | 4    | 1    | 2    | 1    | 3     | 1    | 4    | 2    | 3     | 4     |
| Rhodopsin-like receptors | TF341723   | PF00001 | 7    | 11   | 25   | 11   | 12   | 8    | 2    | 4    | 4    | 3    | 4    | 3     | 3    | 4    | 2    | 3     | 4     |

#### Families contracted in *Apteryx mantelli*

| Description                                                                            | TreeFam ID | Pfam ID | G.a. | A.c. | P.s. | H.s. | M.m. | O.a. | G.g. | A.p. | M.g. | T.g. | F.a. | A.cs. | T.a. | A.m. | S.c. | T.gt. |
|----------------------------------------------------------------------------------------|------------|---------|------|------|------|------|------|------|------|------|------|------|------|-------|------|------|------|-------|
| Cysteine-rich secretory proteins, antigen 5, and pathogenesis-related 1 proteins (CAP) | TF350472   | PF00188 | 3    | 7    | 6    | 9    | 6    | 6    | 5    | 3    | 4    | 4    | 5    | 2     | 3    | 1    | 4    | 4     |
| BTB/POZ domain                                                                         | TF330633   | PF00651 | 19   | 20   | 11   | 15   | 12   | 16   | 15   | 14   | 14   | 17   | 14   | 10    | 13   | 7    | 13   | 12    |
| Kazal-type serine protease inhibitor domain                                            | TF352550   | PF00050 | 0    | 4    | 8    | 4    | 7    | 5    | 4    | 5    | 4    | 9    | 8    | 6     | 6    | 2    | 6    | 5     |
| Ubiquitin-conjugating enzyme E2 E                                                      | TF101117   | PF00179 | 11   | 5    | 5    | 7    | 10   | 8    | 4    | 7    | 5    | 9    | 5    | 5     | 6    | 3    | 6    | 6     |
| Zinc finger, C4 type (two domains)                                                     | TF352167   | PF00105 | 15   | 15   | 11   | 13   | 14   | 8    | 10   | 8    | 7    | 13   | 10   | 8     | 8    | 4    | 7    | 8     |
| centromere protein F                                                                   | TF101133   | PF10473 | 2    | 1    | 2    | 1    | 1    | 1    | 1    | 1    | 1    | 4    | 1    | 4     | 3    | 1    | 3    | 4     |
| Immunoglobulin C1-set domain                                                           | TF336715   | PF07654 | 1    | 2    | 2    | 50   | 12   | 6    | 4    | 3    | 2    | 2    | 2    | 3     | 3    | 1    | 3    | 2     |
| Pyridoxal-phosphate dependent                                                          | TF300784   | PF00291 | 1    | 2    | 2    | 1    | 1    | 1    | 2    | 4    | 1    | 6    | 4    | 5     | 4    | 2    | 4    | 4     |

| enzyme                                                        |                   |                |             |             |             |             |             |             |             |             |             |             |             |              |             |             |             |              |
|---------------------------------------------------------------|-------------------|----------------|-------------|-------------|-------------|-------------|-------------|-------------|-------------|-------------|-------------|-------------|-------------|--------------|-------------|-------------|-------------|--------------|
| <b>Description</b>                                            | <b>TreeFam ID</b> | <b>Pfam ID</b> | <i>G.a.</i> | <i>A.c.</i> | <i>P.s.</i> | <i>H.s.</i> | <i>M.m.</i> | <i>O.a.</i> | <i>G.g.</i> | <i>A.p.</i> | <i>M.g.</i> | <i>T.g.</i> | <i>F.a.</i> | <i>A.cs.</i> | <i>T.a.</i> | <i>A.m.</i> | <i>S.c.</i> | <i>T.gt.</i> |
| Coiled-coil serine-rich protein 2                             | TF331021          | no hit         | 2           | 2           | 3           | 2           | 2           | 2           | 2           | 3           | 2           | 7           | 3           | 4            | 5           | 2           | 5           | 4            |
| Homeobox domain                                               | TF352857          | PF00046        | 10          | 8           | 10          | 9           | 8           | 7           | 14          | 9           | 3           | 7           | 4           | 4            | 5           | 4           | 6           | 7            |
| Histone                                                       | TF332276          | PF00125        | 25          | 15          | 16          | 31          | 39          | 37          | 14          | 16          | 7           | 15          | 7           | 10           | 5           | 10          | 12          | 14           |
| Mouse development and cellular proliferation protein Cullin-7 | TF322454          | PF11515        | 0           | 1           | 2           | 0           | 0           | 1           | 0           | 1           | 2           | 2           | 1           | 1            | 0           | 0           | 1           | 0            |
| Cor1/Xlr/Xmr conserved region                                 | TF328876          | PF04803        | 0           | 0           | 1           | 4           | 83          | 2           | 1           | 1           | 1           | 1           | 1           | 1            | 0           | 0           | 1           | 1            |
| Drug resistance and apoptosis regulator                       | TF336906          | PF15017        | 0           | 0           | 1           | 1           | 1           | 0           | 1           | 0           | 0           | 0           | 0           | 1            | 0           | 0           | 1           | 0            |
| SH3 domain                                                    | TF337296          | PF00018        | 0           | 0           | 0           | 2           | 1           | 2           | 0           | 0           | 0           | 0           | 0           | 2            | 0           | 0           | 1           | 0            |
| Immunoglobulin V-set domain                                   | TF337790          | PF07686        | 0           | 0           | 1           | 8           | 0           | 0           | 1           | 1           | 0           | 1           | 1           | 1            | 1           | 0           | 1           | 1            |
| Dynein, axonemal, heavy chain 14                              | TF342240          | no hit         | 0           | 0           | 0           | 1           | 0           | 1           | 1           | 1           | 0           | 0           | 0           | 1            | 0           | 0           | 1           | 0            |
| Translation initiation factor 1A / IF-1                       | TF350394          | PF01176        | 1           | 1           | 1           | 2           | 18          | 1           | 1           | 1           | 1           | 1           | 1           | 1            | 1           | 0           | 1           | 1            |
| Zinc-finger double domain                                     | TF350840          | PF13465        | 0           | 0           | 0           | 2           | 1           | 0           | 0           | 0           | 0           | 0           | 0           | 2            | 0           | 0           | 1           | 0            |
| CD59 antigen                                                  | TF352648          | PF00021        | 0           | 15          | 6           | 1           | 1           | 1           | 1           | 1           | 1           | 1           | 1           | 1            | 1           | 0           | 1           | 1            |

| <b>Description</b>                           | <b>TreeFam ID</b> | <b>Pfam ID</b> | <i>G.a.</i> | <i>A.c.</i> | <i>P.s.</i> | <i>H.s.</i> | <i>M.m.</i> | <i>O.a.</i> | <i>G.g.</i> | <i>A.p.</i> | <i>M.g.</i> | <i>T.g.</i> | <i>F.a.</i> | <i>A.cs.</i> | <i>T.a.</i> | <i>A.m.</i> | <i>S.c.</i> | <i>T.gt.</i> |
|----------------------------------------------|-------------------|----------------|-------------|-------------|-------------|-------------|-------------|-------------|-------------|-------------|-------------|-------------|-------------|--------------|-------------|-------------|-------------|--------------|
| Glutathione S-transferase, N-terminal domain | TF353040          | PF02798        | 2           | 4           | 3           | 6           | 13          | 1           | 0           | 0           | 0           | 0           | 1           | 1            | 0           | 0           | 1           | 1            |
| CLASP N terminal                             | TF315518          | PF12348        | 1           | 2           | 2           | 2           | 2           | 2           | 1           | 3           | 2           | 22          | 4           | 1            | 3           | 4           | 3           | 2            |

**Supplementary Table S7.** Annotated membrane proteome in *Apteryx mantelli*, *Homo sapiens*, and birds and reptiles. Significantly \* = contracted, \*\* = expanded family in *Apteryx mantelli* in comparison to birds and reptiles ( $p < 0.05$ ) (shown in bold), calculated using the Viterbi algorithm implemented in CAFE [2] with an estimated gene birth and death parameter of 0.000855882.

*H.s* = *Homo sapiens*, *A.m.* = *Apteryx mantelli*, *G.g.* = *Gallus gallus*, *A.p.* = *Anas platyrhynchos*, *A.c.* = *Anolis carolinensis*, *A.cs.* = *Antristomus carolinensis*, *F.a.* = *Ficedula albicollis*, *M.g.* = *Meleagris gallopavo*, *P.s.* = *Pelodiscus sinensis*, *S.c.* = *Struthio camelus*, *T.g.* = *Taeniopygia guttata*, *T.gt.* = *Tinamus guttatus*, *T.a.* = *Tyto alba*.

§ = Family which showed initially expansion in *Apteryx mantelli* (initially predicted number of genes/number of genes after manual curation).

| Category                                 | <i>H.s</i> | <i>A.m.</i> | <i>G.g.</i> | <i>A.p.</i> | <i>A.c.</i> | <i>A.cs.</i> | <i>F.a.</i> | <i>M.g.</i> | <i>P.s.</i> | <i>S.c.</i> | <i>T.g.</i> | <i>T.gt.</i> | <i>T.a.</i> |
|------------------------------------------|------------|-------------|-------------|-------------|-------------|--------------|-------------|-------------|-------------|-------------|-------------|--------------|-------------|
| Classified                               | 2,995      | 2,011       | 2,046       | 2,024       | 2,416       | 1,709        | 2,002       | 1,901       | 2,525       | 1,681       | 2,185       | 1,917        | 1,576       |
| Unclassified                             | 2,741      | 1,984       | 1,886       | 1,670       | 2,112       | 1,240        | 1,787       | 1,616       | 1,889       | 1,310       | 1,654       | 1,340        | 1,216       |
| Total no predicted TM proteins (Phobius) | 5,736      | 3,995       | 3,932       | 3,694       | 4,528       | 2,949        | 3,789       | 3,517       | 4,414       | 2,991       | 3,839       | 3,257        | 2,792       |
| Total no of genes                        | 20,406     | 18,033      | 15,508      | 15,634      | 18,596      | 14,676       | 15,303      | 14,125      | 18,188      | 16,178      | 17,488      | 15,773       | 13,613      |

| Class/Family      | <i>H.s</i> | <i>A.m.</i> | <i>G.g.</i> | <i>A.p.</i> | <i>A.c.</i> | <i>A.cs.</i> | <i>F.a.</i> | <i>M.g.</i> | <i>P.s.</i> | <i>S.c.</i> | <i>T.g.</i> | <i>T.gt.</i> | <i>T.a.</i> |   |
|-------------------|------------|-------------|-------------|-------------|-------------|--------------|-------------|-------------|-------------|-------------|-------------|--------------|-------------|---|
| <b>Enzymes</b>    |            |             |             |             |             |              |             |             |             |             |             |              |             |   |
| 1                 |            | 2           | 2           | 2           | 2           | 1            | 2           | 2           | 2           | 2           | 1           | 1            | 2           | 1 |
| 1.1               |            | 10          | 4           | 8           | 8           | 9            | 7           | 9           | 9           | 9           | 6           | 11           | 7           | 6 |
| 1.11              |            | 1           | 1           | 0           | 1           | 1            | 0           | 0           | 0           | 1           | 0           | 0            | 1           | 0 |
| 1.14              |            | 2           | 0           | 1           | 1           | 2            | 1           | 1           | 0           | 1           | 1           | 0            | 0           | 1 |
| 3.4               |            | 5           | 0           | 1           | 0           | 0            | 0           | 0           | 0           | 0           | 0           | 0            | 0           | 0 |
| 1.1.1.145/5.3.3.1 |            | 2           | 1           | 1           | 1           | 1            | 0           | 1           | 0           | 1           | 0           | 1            | 0           | 0 |
| 1.14.11           |            | 1           | 0           | 2           | 1           | 1            | 0           | 1           | 1           | 1           | 1           | 1            | 0           | 0 |
| 1.14.13           |            | 11          | 6           | 7           | 5           | 12           | 3           | 7           | 7           | 7           | 4           | 5            | 5           | 4 |
| 1.14.14           |            | 14          | 4           | 7           | 6           | 11           | 3           | 7           | 7           | 11          | 4           | 5            | 4           | 4 |
| 1.14.15           |            | 1           | 0           | 0           | 0           | 2            | 0           | 0           | 0           | 0           | 0           | 0            | 0           | 0 |

| <b>Class/Family</b> | <b>H.s</b> | <b>A.m.</b> | <b>G.g.</b> | <b>A.p.</b> | <b>A.c.</b> | <b>A.cs.</b> | <b>F.a.</b> | <b>M.g.</b> | <b>P.s.</b> | <b>S.c.</b> | <b>T.g.</b> | <b>T.gt.</b> | <b>T.a.</b> |
|---------------------|------------|-------------|-------------|-------------|-------------|--------------|-------------|-------------|-------------|-------------|-------------|--------------|-------------|
| 1.14.17             | 1          | 2           | 1           | 1           | 1           | 0            | 1           | 1           | 1           | 0           | 1           | 0            | 0           |
| 1.14.17.3/4.3.2.5   | 1          | 0           | 1           | 1           | 1           | 0            | 1           | 1           | 1           | 1           | 1           | 1            | 1           |
| 1.14.18             | 1          | 1           | 1           | 1           | 1           | 1            | 1           | 1           | 1           | 1           | 1           | 1            | 1           |
| 1.14.19             | 1          | 1           | 1           | 1           | 1           | 1            | 1           | 1           | 1           | 1           | 1           | 1            | 1           |
| 1.14.21             | 1          | 1           | 1           | 1           | 1           | 0            | 1           | 1           | 1           | 1           | 1           | 1            | 0           |
| 1.14.99             | 4          | 3           | 4           | 4           | 3           | 4            | 3           | 3           | 4           | 4           | 4           | 4            | 3           |
| 1.17.4              | 1          | 1           | 1           | 1           | 1           | 1            | 1           | 1           | 1           | 1           | 1           | 1            | 1           |
| 1.2.1               | 2          | 1           | 1           | 1           | 1           | 1            | 1           | 2           | 1           | 1           | 1           | 1            | 0           |
| 1.3.1               | 2          | 3           | 1           | 1           | 2           | 1            | 1           | 1           | 2           | 1           | 1           | 1            | 1           |
| 1.3.3               | 2          | 0           | 1           | 0           | 0           | 0            | 0           | 0           | 0           | 0           | 0           | 0            | 0           |
| 1.3.99              | 2          | 2           | 3           | 3           | 3           | 3            | 3           | 1           | 3           | 3           | 3           | 2            | 3           |
| 1.4.3               | 2          | 1           | 2           | 2           | 2           | 2            | 2           | 2           | 2           | 2           | 1           | 2            | 2           |
| 1.5.1               | 1          | 1           | 1           | 1           | 1           | 1            | 1           | 1           | 1           | 1           | 1           | 1            | 1           |
| 1.5.3               | 1          | 0           | 0           | 0           | 1           | 0            | 0           | 0           | 0           | 0           | 0           | 0            | 0           |
| 1.5.5               | 1          | 0           | 0           | 1           | 1           | 1            | 1           | 0           | 1           | 1           | 1           | 0            | 0           |
| 1.6.1               | 1          | 2           | 1           | 1           | 2           | 1            | 1           | 1           | 2           | 1           | 1           | 2            | 1           |
| 1.6.2               | 1          | 1           | 1           | 1           | 0           | 2            | 0           | 1           | 1           | 2           | 1           | 0            | 2           |
| 1.6.3               | 5          | 4           | 4           | 3           | 4           | 3            | 3           | 4           | 3           | 3           | 3           | 3            | 3           |
| <b>1.6.5*</b>       | <b>15</b>  | <b>2</b>    | <b>13</b>   | <b>6</b>    | <b>14</b>   | <b>3</b>     | <b>13</b>   | <b>13</b>   | <b>9</b>    | <b>4</b>    | <b>15</b>   | <b>9</b>     | <b>8</b>    |
| 1.8.3               | 2          | 0           | 2           | 1           | 1           | 1            | 2           | 1           | 1           | 1           | 2           | 1            | 1           |
| <b>1.9.3*</b>       | <b>13</b>  | <b>1</b>    | <b>6</b>    | <b>1</b>    | <b>6</b>    | <b>2</b>     | <b>6</b>    | <b>5</b>    | <b>7</b>    | <b>3</b>    | <b>6</b>    | <b>2</b>     | <b>3</b>    |
| 1.97.1              | 2          | 0           | 2           | 2           | 2           | 2            | 2           | 1           | 2           | 2           | 3           | 2            | 2           |
| 2.1.1               | 2          | 2           | 2           | 2           | 1           | 1            | 2           | 1           | 2           | 2           | 2           | 2            | 2           |
| 2.3.1               | 57         | 37          | 42          | 42          | 52          | 34           | 42          | 37          | 46          | 36          | 43          | 35           | 30          |
| 2.4.1               | 64         | 31          | 37          | 37          | 40          | 22           | 37          | 31          | 37          | 26          | 35          | 24           | 21          |
| 2.4.2               | 5          | 2           | 2           | 1           | 4           | 1            | 3           | 2           | 3           | 1           | 2           | 1            | 1           |
| 2.4.99              | 4          | 0           | 1           | 1           | 2           | 0            | 1           | 0           | 0           | 0           | 1           | 1            | 0           |
| 2.5.1               | 4          | 3           | 3           | 3           | 6           | 3            | 3           | 3           | 4           | 4           | 3           | 3            | 3           |
| 2.7.1               | 4          | 0           | 1           | 1           | 1           | 1            | 0           | 1           | 2           | 0           | 1           | 0            | 0           |
| 2.7.10              | 1          | 0           | 1           | 1           | 0           | 0            | 1           | 1           | 1           | 1           | 1           | 0            | 1           |
| 2.7.11              | 20         | 11          | 11          | 11          | 15          | 7            | 12          | 11          | 9           | 10          | 13          | 11           | 7           |
| 2.7.7               | 2          | 2           | 2           | 2           | 2           | 2            | 2           | 2           | 2           | 2           | 2           | 2            | 2           |
| 2.7.8               | 8          | 7           | 8           | 9           | 10          | 6            | 8           | 7           | 7           | 8           | 9           | 8            | 7           |

| <b>Class/Family</b>  | <b>H.s</b> | <b>A.m.</b> | <b>G.g.</b> | <b>A.p.</b> | <b>A.c.</b> | <b>A.cs.</b> | <b>F.a.</b> | <b>M.g.</b> | <b>P.s.</b> | <b>S.c.</b> | <b>T.g.</b> | <b>T.gt.</b> | <b>T.a.</b> |
|----------------------|------------|-------------|-------------|-------------|-------------|--------------|-------------|-------------|-------------|-------------|-------------|--------------|-------------|
| 2.8.2                | 12         | 2           | 8           | 5           | 6           | 4            | 6           | 6           | 6           | 5           | 7           | 4            | 3           |
| 3.1.1                | 6          | 4           | 2           | 4           | 9           | 1            | 2           | 3           | 6           | 2           | 1           | 2            | 2           |
| 3.1.11               | 1          | 0           | 0           | 0           | 0           | 0            | 0           | 0           | 0           | 0           | 0           | 0            | 0           |
| 3.1.2                | 3          | 1           | 2           | 0           | 0           | 1            | 1           | 1           | 1           | 2           | 2           | 1            | 0           |
| 3.1.3                | 34         | 24          | 24          | 20          | 32          | 16           | 24          | 24          | 22          | 18          | 27          | 19           | 18          |
| 3.1.4                | 12         | 4           | 5           | 5           | 9           | 3            | 8           | 5           | 8           | 4           | 5           | 3            | 4           |
| 3.1.4.1/3.6.1.9      | 2          | 1           | 2           | 2           | 2           | 0            | 1           | 1           | 1           | 0           | 2           | 0            | 0           |
| 3.1.6                | 5          | 3           | 4           | 2           | 4           | 4            | 3           | 3           | 3           | 4           | 3           | 4            | 4           |
| 3.2.1                | 16         | 6           | 11          | 8           | 11          | 1            | 10          | 5           | 11          | 6           | 7           | 3            | 4           |
| 3.2.2                | 1          | 1           | 0           | 0           | 0           | 0            | 0           | 0           | 1           | 1           | 0           | 0            | 0           |
| 3.4.                 | 1          | 1           | 1           | 1           | 1           | 0            | 1           | 1           | 0           | 1           | 0           | 0            | 0           |
| 3.4.11               | 3          | 2           | 3           | 3           | 3           | 2            | 3           | 1           | 2           | 2           | 2           | 2            | 1           |
| 3.4.15               | 1          | 1           | 1           | 1           | 1           | 2            | 1           | 1           | 1           | 2           | 1           | 2            | 2           |
| 3.4.17               | 3          | 1           | 3           | 3           | 1           | 2            | 2           | 2           | 3           | 2           | 3           | 0            | 2           |
| 3.4.19               | 1          | 0           | 0           | 0           | 0           | 0            | 1           | 0           | 0           | 0           | 0           | 0            | 0           |
| 3.4.21               | 17         | 8           | 13          | 12          | 11          | 8            | 13          | 13          | 11          | 6           | 10          | 6            | 5           |
| 3.4.23               | 2          | 2           | 2           | 2           | 2           | 1            | 2           | 2           | 1           | 1           | 2           | 1            | 1           |
| 3.4.24               | 36         | 22          | 30          | 27          | 32          | 11           | 26          | 28          | 24          | 18          | 20          | 17           | 16          |
| 3.5.1                | 3          | 3           | 3           | 3           | 1           | 1            | 3           | 2           | 3           | 2           | 1           | 2            | 2           |
| 3.6.1 <sup>s</sup>   | 9          | 12/11       | 11          | 11          | 9           | 7            | 10          | 9           | 8           | 8           | 10          | 6            | 4           |
| 4.1.2                | 1          | 1           | 0           | 0           | 1           | 1            | 0           | 0           | 1           | 1           | 0           | 1            | 0           |
| 4.2.1                | 4          | 3           | 4           | 2           | 2           | 2            | 3           | 4           | 4           | 1           | 1           | 1            | 1           |
| 4.4.1                | 1          | 1           | 2           | 2           | 1           | 2            | 2           | 2           | 2           | 1           | 2           | 1            | 2           |
| 4.6.1                | 10         | 12          | 8           | 8           | 11          | 8            | 7           | 9           | 11          | 10          | 9           | 13           | 8           |
| 5.1.3                | 1          | 1           | 1           | 1           | 1           | 1            | 1           | 1           | 1           | 1           | 1           | 1            | 1           |
| 5.2.1                | 2          | 1           | 1           | 0           | 1           | 0            | 2           | 0           | 2           | 1           | 2           | 1            | 0           |
| 5.3.3                | 2          | 1           | 1           | 1           | 2           | 0            | 1           | 1           | 2           | 1           | 1           | 1            | 0           |
| 5.3.4                | 1          | 1           | 0           | 0           | 0           | 0            | 0           | 0           | 1           | 1           | 0           | 0            | 0           |
| 5.3.99               | 2          | 1           | 2           | 2           | 2           | 2            | 2           | 2           | 2           | 1           | 2           | 0            | 1           |
| 6.2.1                | 5          | 3           | 4           | 5           | 5           | 3            | 4           | 5           | 4           | 5           | 5           | 4            | 3           |
| 6.3.2                | 2          | 2           | 2           | 2           | 2           | 1            | 2           | 2           | 1           | 2           | 2           | 2            | 2           |
| <b>Miscellaneous</b> |            |             |             |             |             |              |             |             |             |             |             |              |             |
| Ligand Delta         | 5          | 3           | 4           | 4           | 5           | 4            | 4           | 4           | 4           | 3           | 4           | 4            | 3           |

| <b>Class/Family</b>                 | <b>H.s</b> | <b>A.m.</b> | <b>G.g.</b> | <b>A.p.</b> | <b>A.c.</b> | <b>A.cs.</b> | <b>F.a.</b> | <b>M.g.</b> | <b>P.s.</b> | <b>S.c.</b> | <b>T.g.</b> | <b>T.gt.</b> | <b>T.a.</b> |
|-------------------------------------|------------|-------------|-------------|-------------|-------------|--------------|-------------|-------------|-------------|-------------|-------------|--------------|-------------|
| Ligand EphB                         | 3          | 1           | 2           | 1           | 3           | 1            | 2           | 2           | 3           | 2           | 2           | 2            | 1           |
| Ligand IG Ligand                    | 2          | 2           | 4           | 2           | 1           | 2            | 3           | 3           | 2           | 2           | 2           | 2            | 2           |
| Ligand Jagged                       | 2          | 2           | 2           | 2           | 2           | 0            | 2           | 2           | 2           | 2           | 2           | 2            | 1           |
| <b>Ligand MHC**</b>                 | <b>18</b>  | <b>4/4</b>  | <b>9</b>    | <b>3</b>    | <b>9</b>    | <b>1</b>     | <b>4</b>    | <b>4</b>    | <b>4</b>    | <b>0</b>    | <b>2</b>    | <b>0</b>     | <b>0</b>    |
| Ligand Neuroligin                   | 5          | 4           | 3           | 3           | 4           | 3            | 3           | 3           | 3           | 3           | 2           | 2            | 2           |
| Ligand NKG2DL                       | 4          | 0           | 0           | 0           | 0           | 0            | 0           | 0           | 0           | 0           | 0           | 0            | 0           |
| Ligand Semaphorins                  | 11         | 6           | 8           | 6           | 10          | 3            | 8           | 8           | 8           | 6           | 7           | 5            | 3           |
| Butyrophilin                        | 15         | 4           | 12          | 12          | 4           | 2            | 5           | 9           | 51          | 3           | 1           | 4            | 4           |
| CMTM                                | 9          | 5           | 6           | 6           | 6           | 5            | 5           | 4           | 5           | 5           | 6           | 5            | 5           |
| DnaJ                                | 11         | 6           | 7           | 6           | 11          | 5            | 7           | 6           | 9           | 4           | 7           | 7            | 6           |
| DPY19                               | 4          | 3           | 3           | 3           | 3           | 3            | 3           | 3           | 3           | 3           | 4           | 3            | 3           |
| Ferlin                              | 4          | 4           | 6           | 5           | 4           | 3            | 4           | 7           | 3           | 3           | 4           | 2            | 3           |
| GBP                                 | 7          | 2           | 4           | 2           | 3           | 0            | 2           | 5           | 3           | 2           | 2           | 2            | 1           |
| HERV1                               | 2          | 0           | 0           | 0           | 8           | 4            | 0           | 0           | 0           | 0           | 1           | 2            | 7           |
| IFITM                               | 4          | 2           | 4           | 2           | 3           | 0            | 3           | 3           | 2           | 0           | 2           | 1            | 0           |
| LASS                                | 9          | 11          | 10          | 10          | 7           | 9            | 7           | 9           | 9           | 9           | 8           | 8            | 9           |
| LRRC                                | 64         | 44          | 56          | 43          | 57          | 38           | 52          | 44          | 55          | 34          | 40          | 39           | 30          |
| LRRC8                               | 5          | 4           | 4           | 4           | 5           | 4            | 4           | 4           | 5           | 4           | 4           | 4            | 4           |
| MAL                                 | 5          | 5           | 4           | 5           | 7           | 4            | 4           | 5           | 7           | 3           | 4           | 5            | 3           |
| REEP                                | 4          | 1           | 4           | 4           | 4           | 5            | 5           | 4           | 5           | 5           | 5           | 4            | 3           |
| RTP                                 | 4          | 1           | 0           | 0           | 0           | 0            | 0           | 0           | 1           | 0           | 0           | 0            | 0           |
| SCAMP                               | 4          | 4           | 5           | 5           | 4           | 5            | 5           | 2           | 5           | 5           | 5           | 4            | 4           |
| SIRP                                | 3          | 0           | 0           | 1           | 2           | 0            | 1           | 2           | 2           | 0           | 2           | 0            | 0           |
| Synaptogyrin                        | 4          | 3           | 3           | 2           | 4           | 1            | 3           | 1           | 3           | 1           | 2           | 1            | 1           |
| Synaptophysin                       | 4          | 2           | 3           | 3           | 5           | 3            | 3           | 2           | 4           | 2           | 4           | 3            | 2           |
| Synaptotagmin                       | 14         | 9           | 11          | 9           | 12          | 10           | 11          | 10          | 12          | 9           | 11          | 10           | 10          |
| <b>Teneurin*</b>                    | <b>4</b>   | <b>0</b>    | <b>3</b>    | <b>5</b>    | <b>3</b>    | <b>1</b>     | <b>4</b>    | <b>4</b>    | <b>3</b>    | <b>4</b>    | <b>3</b>    | <b>3</b>     | <b>1</b>    |
| Tetraspanin                         | 32         | 24          | 27          | 26          | 35          | 21           | 29          | 25          | 31          | 22          | 27          | 23           | 20          |
| TMED                                | 8          | 6           | 7           | 8           | 8           | 4            | 7           | 6           | 10          | 5           | 4           | 5            | 5           |
| Structural and Adhesion             |            |             |             |             |             |              |             |             |             |             |             |              |             |
| CadherinClassic                     | 22         | 16          | 19          | 19          | 21          | 25           | 20          | 18          | 19          | 18          | 14          | 19           | 13          |
| Structural and Adhesion Cadherin    | 7          | 0           | 3           | 3           | 3           | 3            | 3           | 2           | 4           | 3           | 2           | 3            | 3           |
| Structural and Adhesion Calsyntenin | 3          | 2           | 3           | 3           | 3           | 2            | 3           | 3           | 3           | 3           | 3           | 3            | 2           |



| <b>Class/Family</b>                                  | <b>H.s</b> | <b>A.m.</b> | <b>G.g.</b> | <b>A.p.</b> | <b>A.c.</b> | <b>A.cs.</b> | <b>F.a.</b> | <b>M.g.</b> | <b>P.s.</b> | <b>S.c.</b> | <b>T.g.</b> | <b>T.gt.</b> | <b>T.a.</b> |
|------------------------------------------------------|------------|-------------|-------------|-------------|-------------|--------------|-------------|-------------|-------------|-------------|-------------|--------------|-------------|
| Structural and Adhesion Claudin <sup>§</sup>         | 23         | 16/15       | 18          | 20          | 24          | 13           | 19          | 17          | 19          | 11          | 16          | 10           | 13          |
| Structural and Adhesion Crumbs Protein               | 3          | 2           | 2           | 2           | 2           | 1            | 2           | 2           | 2           | 2           | 3           | 1            | 1           |
| Structural and Adhesion EMP-PMP22-LIM                | 5          | 3           | 3           | 3           | 6           | 3            | 3           | 3           | 6           | 3           | 2           | 3            | 2           |
| Structural and Adhesion GapJunction                  | 20         | 18          | 16          | 18          | 18          | 16           | 20          | 14          | 17          | 15          | 20          | 16           | 13          |
| Structural and Adhesion IG Adhesion Proteins         | 43         | 12          | 17          | 17          | 22          | 14           | 16          | 15          | 18          | 14          | 15          | 28           | 10          |
| Structural and Adhesion IG MPZ                       | 4          | 3           | 3           | 3           | 2           | 2            | 3           | 3           | 4           | 3           | 3           | 2            | 3           |
| <b>Structural and Adhesion Junctophilin**</b>        | <b>4</b>   | <b>2/2</b>  | <b>2</b>    | <b>3</b>    | <b>3</b>    | <b>0</b>     | <b>2</b>    | <b>3</b>    | <b>3</b>    | <b>0</b>    | <b>3</b>    | <b>0</b>     | <b>0</b>    |
| <b>Structural and Adhesion Protocadherins Beta**</b> | <b>15</b>  | <b>2/2</b>  | <b>3</b>    | <b>1</b>    | <b>15</b>   | <b>0</b>     | <b>4</b>    | <b>1</b>    | <b>3</b>    | <b>1</b>    | <b>1</b>    | <b>0</b>     | <b>0</b>    |
| <b>Structural and Adhesion Protocadherins*</b>       | <b>23</b>  | <b>22</b>   | <b>24</b>   | <b>20</b>   | <b>24</b>   | <b>29</b>    | <b>24</b>   | <b>25</b>   | <b>21</b>   | <b>50</b>   | <b>18</b>   | <b>42</b>    | <b>8</b>    |
| Structural and Adhesion Sarcoglycan                  | 6          | 2           | 6           | 4           | 6           | 4            | 4           | 2           | 5           | 4           | 5           | 3            | 4           |
| Structural and Adhesion UPK3                         | 2          | 1           | 2           | 1           | 0           | 0            | 1           | 2           | 3           | 0           | 0           | 0            | 0           |
| ARMC                                                 | 6          | 0           | 1           | 0           | 1           | 0            | 0           | 0           | 0           | 0           | 0           | 0            | 0           |
| CNIH                                                 | 4          | 2           | 2           | 3           | 4           | 1            | 3           | 3           | 3           | 2           | 3           | 3            | 2           |
| <b>CSMD*</b>                                         | <b>3</b>   | <b>4</b>    | <b>3</b>    | <b>3</b>    | <b>3</b>    | <b>6</b>     | <b>4</b>    | <b>2</b>    | <b>3</b>    | <b>15</b>   | <b>3</b>    | <b>16</b>    | <b>0</b>    |
| cTAGE                                                | 3          | 1           | 2           | 0           | 0           | 1            | 1           | 0           | 0           | 0           | 1           | 0            | 1           |
| DC2                                                  | 1          | 1           | 1           | 1           | 1           | 1            | 1           | 1           | 1           | 1           | 1           | 1            | 1           |
| ELOVL                                                | 6          | 6           | 6           | 7           | 5           | 5            | 7           | 5           | 8           | 4           | 6           | 8            | 6           |
| FAM163                                               | 3          | 2           | 2           | 2           | 2           | 1            | 2           | 2           | 2           | 1           | 2           | 1            | 0           |
| FAM74                                                | 1          | 0           | 0           | 0           | 0           | 0            | 0           | 0           | 0           | 0           | 0           | 0            | 0           |
| FAM75                                                | 8          | 0           | 0           | 0           | 0           | 0            | 0           | 0           | 0           | 0           | 0           | 0            | 0           |
| HIGD                                                 | 4          | 2           | 2           | 2           | 3           | 2            | 2           | 2           | 1           | 1           | 2           | 1            | 2           |
| <b>IG Unknown function**</b>                         | <b>9</b>   | <b>5/5</b>  | <b>5</b>    | <b>3</b>    | <b>5</b>    | <b>3</b>     | <b>5</b>    | <b>4</b>    | <b>7</b>    | <b>3</b>    | <b>3</b>    | <b>1</b>     | <b>1</b>    |
| ITM2                                                 | 3          | 1           | 3           | 3           | 3           | 3            | 3           | 3           | 2           | 3           | 3           | 3            | 3           |
| LHFP                                                 | 6          | 5           | 4           | 5           | 5           | 4            | 5           | 3           | 7           | 3           | 6           | 5            | 2           |
| LRRC37                                               | 4          | 0           | 0           | 0           | 1           | 0            | 0           | 0           | 1           | 0           | 0           | 0            | 0           |
| MS4A                                                 | 14         | 0           | 1           | 1           | 5           | 0            | 2           | 1           | 7           | 1           | 1           | 1            | 0           |
| NTMG1                                                | 1          | 0           | 0           | 0           | 0           | 4            | 1           | 0           | 0           | 0           | 1           | 1            | 0           |

| <b>Class/Family</b>         | <b>H.s</b> | <b>A.m.</b> | <b>G.g.</b> | <b>A.p.</b> | <b>A.c.</b> | <b>A.cs.</b> | <b>F.a.</b> | <b>M.g.</b> | <b>P.s.</b> | <b>S.c.</b> | <b>T.g.</b> | <b>T.gt.</b> | <b>T.a.</b> |
|-----------------------------|------------|-------------|-------------|-------------|-------------|--------------|-------------|-------------|-------------|-------------|-------------|--------------|-------------|
| ORM1DL                      | 3          | 3           | 3           | 2           | 3           | 2            | 2           | 2           | 3           | 3           | 2           | 3            | 2           |
| Reticulon                   | 4          | 3           | 2           | 2           | 4           | 0            | 2           | 2           | 3           | 3           | 2           | 1            | 1           |
| RNFT                        | 2          | 2           | 2           | 2           | 2           | 2            | 2           | 2           | 2           | 2           | 2           | 2            | 2           |
| TetraspaninL6               | 6          | 1           | 5           | 5           | 5           | 5            | 5           | 5           | 6           | 5           | 5           | 5            | 4           |
| TM9SF                       | 4          | 6           | 4           | 4           | 5           | 4            | 4           | 4           | 4           | 4           | 5           | 4            | 4           |
| TMEM132                     | 5          | 4           | 4           | 4           | 5           | 4            | 5           | 4           | 4           | 3           | 4           | 4            | 3           |
| TMEM16                      | 9          | 11          | 8           | 9           | 10          | 8            | 8           | 8           | 10          | 9           | 8           | 9            | 7           |
| TMEM30                      | 2          | 2           | 2           | 2           | 2           | 2            | 2           | 2           | 2           | 2           | 2           | 2            | 2           |
| TMEM63                      | 3          | 4           | 3           | 3           | 3           | 3            | 3           | 3           | 3           | 3           | 3           | 3            | 3           |
| <b>Receptors</b>            |            |             |             |             |             |              |             |             |             |             |             |              |             |
| GPCR Adhesion               | 30         | 27          | 23          | 22          | 22          | 19           | 22          | 21          | 31          | 35          | 20          | 35           | 15          |
| GPCR Frizzled               | 11         | 13          | 9           | 11          | 10          | 9            | 11          | 10          | 8           | 8           | 12          | 10           | 6           |
| GPCR Glutamate <sup>s</sup> | 22         | 19/18       | 17          | 17          | 69          | 13           | 17          | 18          | 20          | 14          | 16          | 14           | 11          |
| GPCR Olf                    | 366        | 82          | 30          | 77          | 89          | 85           | 39          | 43          | 282         | 26          | 234         | 138          | 82          |
| GPCR Other                  | 5          | 3           | 3           | 3           | 4           | 4            | 3           | 3           | 3           | 3           | 4           | 3            | 3           |
| GPCR PutativeOlfR           | 7          | 0           | 1           | 0           | 0           | 0            | 0           | 0           | 17          | 0           | 0           | 1            | 0           |
| GPCR Rhodopsin              | 280        | 254         | 254         | 271         | 298         | 209          | 251         | 229         | 323         | 163         | 247         | 202          | 198         |
| GPCR Secretin               | 14         | 16          | 15          | 14          | 15          | 13           | 14          | 15          | 14          | 12          | 20          | 15           | 13          |
| GPCR TAS2R                  | 24         | 0           | 1           | 3           | 3           | 2            | 3           | 1           | 0           | 1           | 3           | 1            | 1           |
| GPCR V1R                    | 3          | 0           | 0           | 0           | 0           | 0            | 0           | 0           | 0           | 0           | 0           | 0            | 0           |
| IG FcR                      | 13         | 1           | 2           | 2           | 0           | 1            | 2           | 1           | 1           | 1           | 1           | 0            | 1           |
| IG KIR                      | 6          | 0           | 0           | 0           | 0           | 0            | 0           | 0           | 0           | 0           | 0           | 0            | 0           |
| IG LILR                     | 10         | 1           | 7           | 0           | 2           | 0            | 0           | 0           | 2           | 0           | 0           | 0            | 0           |
| IG NetrinR                  | 12         | 10          | 10          | 9           | 10          | 9            | 9           | 10          | 10          | 7           | 10          | 10           | 9           |
| <b>IG CD1**</b>             | <b>4</b>   | <b>2/2</b>  | <b>2</b>    | <b>5</b>    | <b>1</b>    | <b>0</b>     | <b>1</b>    | <b>1</b>    | <b>1</b>    | <b>0</b>    | <b>1</b>    | <b>0</b>     | <b>0</b>    |
| IG CD300                    | 6          | 1           | 2           | 1           | 1           | 0            | 1           | 3           | 3           | 0           | 0           | 0            | 0           |
| <b>IG Misc**</b>            | <b>6</b>   | <b>6/6</b>  | <b>4</b>    | <b>2</b>    | <b>3</b>    | <b>1</b>     | <b>3</b>    | <b>2</b>    | <b>4</b>    | <b>1</b>    | <b>1</b>    | <b>4</b>     | <b>1</b>    |
| IG NCR                      | 3          | 0           | 1           | 0           | 0           | 0            | 0           | 0           | 1           | 0           | 0           | 0            | 0           |
| IG Other                    | 8          | 4           | 4           | 3           | 6           | 4            | 5           | 3           | 6           | 6           | 4           | 4            | 4           |
| <b>IG PVR**</b>             | <b>5</b>   | <b>2/2</b>  | <b>2</b>    | <b>2</b>    | <b>3</b>    | <b>0</b>     | <b>2</b>    | <b>1</b>    | <b>4</b>    | <b>0</b>    | <b>2</b>    | <b>0</b>     | <b>0</b>    |
| <b>IG ROBO*</b>             | <b>4</b>   | <b>2</b>    | <b>4</b>    | <b>3</b>    | <b>4</b>    | <b>8</b>     | <b>4</b>    | <b>4</b>    | <b>4</b>    | <b>8</b>    | <b>2</b>    | <b>4</b>     | <b>8</b>    |
| IG TREM                     | 6          | 1           | 1           | 1           | 1           | 1            | 1           | 2           | 2           | 1           | 1           | 1            | 1           |
| IG TCR                      | 2          | 0           | 0           | 0           | 1           | 0            | 0           | 1           | 0           | 0           | 0           | 0            | 0           |

| <b>Class/Family</b>        | <b>H.s</b> | <b>A.m.</b>  | <b>G.g.</b> | <b>A.p.</b> | <b>A.c.</b> | <b>A.cs.</b> | <b>F.a.</b> | <b>M.g.</b> | <b>P.s.</b> | <b>S.c.</b> | <b>T.g.</b> | <b>T.gt.</b> | <b>T.a.</b> |
|----------------------------|------------|--------------|-------------|-------------|-------------|--------------|-------------|-------------|-------------|-------------|-------------|--------------|-------------|
| IG Type1 CytokineR         | 40         | 21           | 34          | 30          | 26          | 22           | 33          | 25          | 30          | 23          | 26          | 26           | 19          |
| IG Type2 CytokineR         | 10         | 5            | 9           | 10          | 7           | 5            | 7           | 10          | 9           | 4           | 5           | 5            | 4           |
| Kinase Act.TGFB            | 12         | 10           | 12          | 10          | 12          | 7            | 11          | 11          | 12          | 8           | 11          | 10           | 7           |
| Kinase Axl                 | 3          | 2            | 2           | 2           | 3           | 1            | 2           | 2           | 2           | 2           | 2           | 1            | 2           |
| Kinase EGFR                | 4          | 2            | 3           | 3           | 4           | 1            | 3           | 4           | 3           | 2           | 3           | 2            | 2           |
| <b>Kinase Eph**</b>        | <b>14</b>  | <b>14/12</b> | <b>13</b>   | <b>13</b>   | <b>14</b>   | <b>2</b>     | <b>13</b>   | <b>13</b>   | <b>13</b>   | <b>5</b>    | <b>11</b>   | <b>6</b>     | <b>2</b>    |
| Kinase FGFR                | 4          | 4            | 4           | 4           | 3           | 2            | 4           | 3           | 3           | 6           | 5           | 3            | 2           |
| Kinase InsR                | 3          | 3            | 3           | 2           | 2           | 2            | 3           | 3           | 3           | 2           | 2           | 2            | 2           |
| Kinase neutrophin          | 3          | 2            | 3           | 2           | 3           | 1            | 2           | 3           | 3           | 2           | 3           | 2            | 1           |
| Kinase Other               | 17         | 16           | 16          | 15          | 16          | 16           | 17          | 16          | 16          | 17          | 16          | 18           | 14          |
| Kinase PDGFR               | 5          | 3            | 5           | 5           | 5           | 4            | 5           | 5           | 5           | 5           | 6           | 4            | 5           |
| Kinase RGC                 | 6          | 5            | 5           | 5           | 5           | 3            | 5           | 3           | 4           | 5           | 5           | 3            | 3           |
| ADIPO-PAQR                 | 11         | 9            | 8           | 9           | 9           | 9            | 6           | 8           | 10          | 8           | 8           | 8            | 8           |
| Contactin Ass. Prot.       | 7          | 5            | 4           | 3           | 4           | 2            | 4           | 4           | 4           | 3           | 3           | 3            | 1           |
| Derlin                     | 3          | 2            | 3           | 3           | 2           | 3            | 3           | 2           | 2           | 3           | 5           | 3            | 3           |
| IL17                       | 5          | 0            | 3           | 2           | 5           | 2            | 3           | 3           | 2           | 2           | 3           | 2            | 2           |
| Integrin                   | 26         | 12           | 15          | 16          | 25          | 12           | 17          | 16          | 26          | 13          | 14          | 13           | 8           |
| KDELRL                     | 3          | 2            | 2           | 2           | 3           | 2            | 2           | 2           | 3           | 2           | 3           | 2            | 2           |
| <b>LDLR*</b>               | <b>15</b>  | <b>10</b>    | <b>13</b>   | <b>13</b>   | <b>14</b>   | <b>26</b>    | <b>14</b>   | <b>12</b>   | <b>12</b>   | <b>22</b>   | <b>16</b>   | <b>22</b>    | <b>11</b>   |
| Neurexin                   | 3          | 3            | 1           | 2           | 3           | 1            | 2           | 2           | 3           | 1           | 2           | 1            | 1           |
| Neuropilin                 | 2          | 1            | 2           | 2           | 2           | 0            | 2           | 2           | 2           | 1           | 2           | 1            | 1           |
| Notch                      | 4          | 1            | 2           | 2           | 3           | 0            | 2           | 2           | 2           | 0           | 2           | 0            | 0           |
| Patched                    | 2          | 4            | 2           | 2           | 2           | 2            | 2           | 2           | 1           | 3           | 2           | 5            | 2           |
| Plexin                     | 9          | 7            | 7           | 7           | 9           | 6            | 7           | 6           | 7           | 7           | 7           | 7            | 4           |
| RAMP                       | 3          | 1            | 3           | 3           | 3           | 1            | 3           | 3           | 3           | 1           | 2           | 1            | 1           |
| Receptor Type Phosphatases | 20         | 13           | 20          | 17          | 21          | 16           | 19          | 19          | 14          | 20          | 20          | 22           | 15          |
| Selectin                   | 3          | 2            | 2           | 2           | 1           | 0            | 2           | 2           | 1           | 1           | 2           | 1            | 3           |
| Syndecan                   | 3          | 2            | 2           | 3           | 3           | 3            | 3           | 3           | 3           | 3           | 2           | 3            | 3           |
| TNFNGF                     | 26         | 8            | 19          | 16          | 16          | 11           | 18          | 16          | 17          | 9           | 12          | 9            | 9           |
| TOLL                       | 10         | 11           | 10          | 10          | 15          | 4            | 11          | 8           | 10          | 8           | 9           | 8            | 5           |
| Transferrin                | 2          | 1            | 1           | 1           | 0           | 1            | 1           | 1           | 2           | 1           | 1           | 1            | 1           |
| VPS10R                     | 4          | 4            | 3           | 3           | 4           | 2            | 2           | 3           | 3           | 4           | 4           | 4            | 3           |
| SCAR Class A               | 3          | 2            | 2           | 2           | 2           | 2            | 1           | 2           | 1           | 2           | 2           | 1            | 2           |

| <b>Class/Family</b>                              | <b>H.s</b> | <b>A.m.</b> | <b>G.g.</b> | <b>A.p.</b> | <b>A.c.</b> | <b>A.cs.</b> | <b>F.a.</b> | <b>M.g.</b> | <b>P.s.</b> | <b>S.c.</b> | <b>T.g.</b> | <b>T.gt.</b> | <b>T.a.</b> |
|--------------------------------------------------|------------|-------------|-------------|-------------|-------------|--------------|-------------|-------------|-------------|-------------|-------------|--------------|-------------|
| SCAR Class B                                     | 3          | 2           | 3           | 3           | 3           | 3            | 3           | 3           | 3           | 3           | 3           | 2            | 3           |
| SCAR Class D                                     | 4          | 4           | 3           | 2           | 2           | 2            | 3           | 3           | 4           | 2           | 2           | 2            | 2           |
| SCAR Class E                                     | 38         | 2           | 9           | 7           | 16          | 3            | 6           | 2           | 25          | 3           | 4           | 3            | 3           |
| SCAR Class F                                     | 5          | 3           | 5           | 3           | 5           | 4            | 5           | 3           | 5           | 5           | 4           | 4            | 5           |
| SCAR Class G                                     | 1          | 0           | 0           | 0           | 0           | 0            | 0           | 0           | 0           | 0           | 0           | 0            | 0           |
| SCAR Class H                                     | 2          | 2           | 1           | 2           | 2           | 2            | 2           | 1           | 2           | 2           | 1           | 1            | 0           |
| <b>SCAR Macrophage Mannose R*</b>                | <b>5</b>   | <b>2</b>    | <b>7</b>    | <b>6</b>    | <b>5</b>    | <b>8</b>     | <b>8</b>    | <b>4</b>    | <b>6</b>    | <b>7</b>    | <b>5</b>    | <b>7</b>     | <b>4</b>    |
| <b>Transporters</b>                              |            |             |             |             |             |              |             |             |             |             |             |              |             |
| Active transporters ABCA                         | 12         | 14          | 10          | 10          | 10          | 16           | 10          | 10          | 9           | 10          | 13          | 12           | 16          |
| Active transporters ABCB                         | 11         | 12          | 9           | 9           | 12          | 7            | 9           | 8           | 7           | 12          | 8           | 13           | 8           |
| Active transporters ABCC                         | 12         | 15          | 11          | 11          | 12          | 12           | 10          | 11          | 13          | 12          | 14          | 13           | 13          |
| Active transporters ABCD                         | 4          | 2           | 3           | 3           | 4           | 3            | 3           | 3           | 3           | 3           | 3           | 3            | 3           |
| Active transporters ABCG                         | 5          | 8           | 5           | 6           | 7           | 6            | 6           | 5           | 8           | 6           | 8           | 6            | 5           |
| Active transporters P-ATPase <sup>§</sup>        | 36         | 43/35       | 30          | 34          | 45          | 32           | 31          | 31          | 35          | 33          | 39          | 36           | 34          |
| Auxiliary Transport Unit ATP1B                   | 5          | 2           | 4           | 4           | 4           | 4            | 4           | 4           | 3           | 4           | 5           | 4            | 3           |
| Auxiliary Transport Unit CACNA2D                 | 5          | 3           | 3           | 3           | 2           | 3            | 4           | 4           | 4           | 3           | 3           | 2            | 2           |
| Auxiliary Transport Unit CACNG                   | 9          | 6           | 9           | 6           | 8           | 6            | 6           | 5           | 8           | 5           | 7           | 6            | 4           |
| Auxiliary Transport Unit KCNE                    | 5          | 3           | 4           | 5           | 4           | 3            | 4           | 4           | 4           | 3           | 3           | 3            | 3           |
| Auxiliary Transport Unit KCNMB                   | 4          | 3           | 3           | 3           | 3           | 2            | 3           | 3           | 3           | 2           | 3           | 2            | 2           |
| Auxiliary Transport Unit NKAIN                   | 4          | 5           | 4           | 4           | 2           | 5            | 4           | 4           | 4           | 3           | 4           | 4            | 4           |
| Auxiliary Transport Unit PKD1                    | 4          | 7           | 3           | 3           | 5           | 3            | 3           | 3           | 4           | 3           | 2           | 3            | 3           |
| Auxiliary Transport Unit Sodium Channel Beta     | 3          | 3           | 3           | 3           | 4           | 3            | 3           | 2           | 3           | 2           | 3           | 3            | 2           |
| Aquaporins                                       | 13         | 9           | 9           | 9           | 13          | 7            | 10          | 9           | 12          | 7           | 8           | 9            | 7           |
| Chloride channels CLC                            | 9          | 9           | 9           | 10          | 9           | 6            | 8           | 11          | 10          | 7           | 8           | 9            | 7           |
| Chloride channels Tweety                         | 3          | 2           | 2           | 1           | 3           | 2            | 2           | 2           | 2           | 1           | 2           | 1            | 1           |
| Ligand gated ATP gated ion channels              | 7          | 4           | 7           | 7           | 5           | 4            | 5           | 7           | 6           | 5           | 6           | 5            | 5           |
| Ligand gated ion channels cys-loop               | 47         | 38          | 43          | 40          | 40          | 34           | 42          | 41          | 44          | 34          | 43          | 39           | 39          |
| Ligand gated Glutamate ion channels <sup>§</sup> | 18         | 27/18       | 17          | 18          | 21          | 15           | 17          | 19          | 17          | 17          | 17          | 16           | 15          |
| Voltage gated Ca Activated Potassium Channels    | 8          | 6           | 6           | 7           | 7           | 4            | 5           | 6           | 8           | 5           | 6           | 7            | 2           |
| Voltage gated Calcium Channels <sup>§</sup>      | 10         | 22/11       | 8           | 10          | 13          | 15           | 8           | 8           | 11          | 17          | 9           | 34           | 18          |
| Voltage gated catSper-Two-P                      | 6          | 4           | 3           | 3           | 7           | 4            | 3           | 3           | 7           | 4           | 4           | 5            | 4           |

| <b>Class/Family</b>                                | <b>H.s</b> | <b>A.m.</b> | <b>G.g.</b> | <b>A.p.</b> | <b>A.c.</b> | <b>A.cs.</b> | <b>F.a.</b> | <b>M.g.</b> | <b>P.s.</b> | <b>S.c.</b> | <b>T.g.</b> | <b>T.gt.</b> | <b>T.a.</b> |
|----------------------------------------------------|------------|-------------|-------------|-------------|-------------|--------------|-------------|-------------|-------------|-------------|-------------|--------------|-------------|
| Voltage gated cyclic Nucleotide Regulated Channels | 10         | 9           | 10          | 10          | 8           | 6            | 9           | 8           | 8           | 8           | 9           | 8            | 7           |
| Voltage gated inwardly Rectifying K channel        | 15         | 15          | 14          | 15          | 16          | 13           | 16          | 15          | 15          | 13          | 13          | 13           | 11          |
| Voltage gated Potassium channels                   | 40         | 38          | 36          | 38          | 42          | 32           | 38          | 35          | 40          | 33          | 35          | 34           | 27          |
| Voltage gated RYR ITPR                             | 6          | 7           | 5           | 5           | 6           | 4            | 5           | 6           | 5           | 4           | 6           | 5            | 5           |
| Voltage gated Sodium Channels <sup>§</sup>         | 10         | 20/11       | 9           | 10          | 10          | 29           | 9           | 10          | 10          | 17          | 11          | 17           | 28          |
| Voltage gated TRP channels <sup>§</sup>            | 27         | 33/27       | 25          | 25          | 27          | 21           | 24          | 25          | 29          | 20          | 30          | 27           | 23          |
| Voltage gated Two-p K channels                     | 15         | 14          | 13          | 13          | 16          | 12           | 12          | 11          | 14          | 12          | 12          | 13           | 12          |
| BCL2                                               | 4          | 1           | 3           | 2           | 1           | 1            | 2           | 3           | 3           | 2           | 3           | 2            | 1           |
| Bestrophin                                         | 4          | 3           | 3           | 3           | 4           | 3            | 2           | 3           | 2           | 3           | 4           | 3            | 3           |
| SERINC                                             | 5          | 8           | 5           | 5           | 5           | 4            | 5           | 5           | 4           | 4           | 5           | 6            | 3           |
| Sidoreflexins                                      | 5          | 0           | 5           | 4           | 5           | 3            | 5           | 5           | 4           | 3           | 5           | 3            | 4           |
| STEAP                                              | 5          | 3           | 4           | 4           | 4           | 4            | 4           | 3           | 4           | 4           | 6           | 5            | 4           |
| Syntaxin                                           | 12         | 1           | 7           | 7           | 12          | 4            | 6           | 7           | 11          | 2           | 9           | 3            | 3           |
| VAMP                                               | 6          | 0           | 4           | 4           | 5           | 3            | 4           | 4           | 7           | 3           | 4           | 3            | 3           |
| XK                                                 | 8          | 6           | 7           | 8           | 6           | 4            | 8           | 8           | 8           | 4           | 7           | 6            | 4           |
| APC SLC12                                          | 9          | 11          | 8           | 8           | 14          | 7            | 8           | 8           | 6           | 7           | 8           | 9            | 6           |
| APC SLC23                                          | 3          | 4           | 4           | 4           | 4           | 4            | 4           | 4           | 3           | 4           | 5           | 3            | 4           |
| APC SLC26                                          | 11         | 14          | 11          | 11          | 11          | 10           | 9           | 11          | 11          | 10          | 13          | 9            | 10          |
| APC SLC32                                          | 1          | 1           | 2           | 2           | 2           | 2            | 2           | 2           | 2           | 2           | 2           | 2            | 2           |
| APC SLC36                                          | 4          | 2           | 2           | 2           | 2           | 2            | 2           | 2           | 3           | 2           | 4           | 2            | 3           |
| APC SLC38                                          | 11         | 14          | 11          | 10          | 12          | 8            | 11          | 13          | 12          | 11          | 12          | 11           | 9           |
| APC SLC4 <sup>§</sup>                              | 10         | 16/9        | 10          | 9           | 12          | 12           | 10          | 11          | 9           | 6           | 11          | 9            | 7           |
| APC SLC5 <sup>§</sup>                              | 12         | 16/13       | 10          | 11          | 12          | 8            | 9           | 12          | 14          | 7           | 11          | 9            | 9           |
| APC SLC7                                           | 13         | 18          | 16          | 15          | 17          | 12           | 15          | 15          | 16          | 11          | 19          | 14           | 13          |
| DMT AMAC                                           | 5          | 1           | 1           | 1           | 2           | 1            | 1           | 1           | 2           | 1           | 1           | 1            | 1           |
| DMT NIPA                                           | 6          | 8           | 7           | 7           | 7           | 8            | 7           | 7           | 7           | 7           | 8           | 7            | 7           |
| DMT SLC35                                          | 23         | 23          | 20          | 22          | 22          | 20           | 22          | 18          | 19          | 22          | 24          | 20           | 20          |
| MFS HIAT                                           | 4          | 3           | 3           | 4           | 3           | 4            | 4           | 3           | 4           | 5           | 4           | 4            | 5           |
| MFS SLC15                                          | 4          | 5           | 3           | 3           | 4           | 4            | 3           | 3           | 4           | 3           | 3           | 4            | 4           |
| MFS SLC16                                          | 14         | 15          | 16          | 14          | 15          | 13           | 14          | 14          | 15          | 12          | 15          | 13           | 13          |
| MFS SLC17                                          | 9          | 7           | 4           | 5           | 5           | 4            | 4           | 4           | 6           | 4           | 6           | 4            | 5           |

| <b>Class/Family</b>         | <b>H.s</b> | <b>A.m.</b> | <b>G.g.</b> | <b>A.p.</b> | <b>A.c.</b> | <b>A.cs.</b> | <b>F.a.</b> | <b>M.g.</b> | <b>P.s.</b> | <b>S.c.</b> | <b>T.g.</b> | <b>T.gt.</b> | <b>T.a.</b> |
|-----------------------------|------------|-------------|-------------|-------------|-------------|--------------|-------------|-------------|-------------|-------------|-------------|--------------|-------------|
| MFS SLC18                   | 6          | 9           | 5           | 6           | 7           | 5            | 6           | 6           | 6           | 5           | 6           | 5            | 3           |
| MFS SLC19                   | 3          | 4           | 4           | 4           | 3           | 4            | 4           | 3           | 2           | 3           | 6           | 4            | 4           |
| MFS SLC2                    | 14         | 18          | 15          | 17          | 18          | 15           | 16          | 15          | 18          | 16          | 19          | 13           | 16          |
| MFS SLC22                   | 22         | 17          | 14          | 17          | 24          | 16           | 14          | 15          | 21          | 12          | 15          | 12           | 11          |
| MFS SLC29                   | 4          | 4           | 3           | 3           | 3           | 3            | 3           | 3           | 4           | 3           | 3           | 3            | 2           |
| MFS SLC37                   | 3          | 3           | 4           | 4           | 4           | 2            | 3           | 4           | 3           | 3           | 4           | 4            | 3           |
| MFS SLC43                   | 3          | 2           | 2           | 2           | 3           | 1            | 2           | 2           | 3           | 1           | 3           | 1            | 1           |
| MFS SLC45                   | 4          | 6           | 5           | 4           | 4           | 4            | 4           | 4           | 4           | 4           | 5           | 5            | 4           |
| MFS SLC46                   | 3          | 3           | 3           | 3           | 3           | 3            | 3           | 3           | 3           | 2           | 3           | 3            | 3           |
| MFS SLCO                    | 11         | 13          | 10          | 11          | 11          | 8            | 10          | 9           | 11          | 8           | 14          | 10           | 8           |
| MFS Spinster                | 3          | 3           | 2           | 2           | 2           | 2            | 2           | 2           | 2           | 1           | 2           | 1            | 1           |
| MFS SV2                     | 3          | 4           | 3           | 3           | 2           | 2            | 2           | 2           | 3           | 2           | 2           | 3            | 1           |
| Mitochondrial carrier SLC25 | 11         | 6           | 6           | 5           | 11          | 5            | 7           | 6           | 8           | 5           | 7           | 4            | 5           |
| SLC1                        | 7          | 7           | 7           | 7           | 7           | 6            | 7           | 9           | 9           | 5           | 9           | 6            | 3           |
| SLC10                       | 7          | 5           | 4           | 5           | 5           | 2            | 4           | 4           | 6           | 1           | 4           | 2            | 2           |
| SLC11                       | 2          | 2           | 1           | 2           | 2           | 0            | 2           | 1           | 2           | 2           | 1           | 2            | 1           |
| SLC13                       | 5          | 5           | 5           | 5           | 5           | 5            | 5           | 6           | 6           | 4           | 5           | 5            | 5           |
| SLC14                       | 2          | 2           | 1           | 1           | 1           | 4            | 1           | 3           | 1           | 2           | 1           | 4            | 3           |
| SLC20                       | 2          | 2           | 2           | 2           | 1           | 2            | 2           | 2           | 2           | 2           | 2           | 2            | 2           |
| SLC24                       | 6          | 8           | 6           | 6           | 5           | 5            | 6           | 6           | 6           | 6           | 7           | 6            | 5           |
| SLC27                       | 6          | 1           | 2           | 3           | 4           | 2            | 3           | 1           | 3           | 1           | 1           | 1            | 0           |
| SLC28                       | 3          | 3           | 2           | 2           | 2           | 2            | 2           | 2           | 2           | 2           | 2           | 2            | 2           |
| SLC3                        | 2          | 1           | 1           | 1           | 2           | 1            | 1           | 1           | 2           | 1           | 1           | 1            | 1           |
| SLC30                       | 10         | 8           | 9           | 9           | 11          | 9            | 10          | 9           | 11          | 8           | 11          | 8            | 8           |
| SLC31                       | 2          | 4           | 1           | 2           | 1           | 2            | 2           | 2           | 1           | 2           | 2           | 2            | 1           |
| SLC33                       | 1          | 1           | 1           | 1           | 1           | 1            | 1           | 1           | 1           | 1           | 2           | 1            | 1           |
| SLC34                       | 3          | 3           | 2           | 2           | 2           | 1            | 2           | 2           | 1           | 2           | 3           | 3            | 1           |
| SLC39                       | 13         | 10          | 9           | 9           | 12          | 7            | 8           | 8           | 11          | 8           | 11          | 7            | 7           |
| SLC40                       | 1          | 1           | 1           | 1           | 1           | 1            | 1           | 1           | 2           | 1           | 1           | 1            | 1           |
| SLC41                       | 3          | 3           | 4           | 3           | 3           | 3            | 3           | 3           | 3           | 3           | 3           | 3            | 3           |
| SLC42(Rh)                   | 5          | 5           | 5           | 5           | 4           | 3            | 4           | 5           | 4           | 3           | 4           | 3            | 3           |
| SLC44                       | 5          | 6           | 4           | 4           | 5           | 3            | 4           | 3           | 5           | 3           | 4           | 4            | 2           |
| SLC6 <sup>s</sup>           | 20         | 25/21       | 20          | 18          | 21          | 18           | 19          | 21          | 17          | 15          | 23          | 17           | 18          |

| <b>Class/Family</b> | <b><i>H.s</i></b> | <b><i>A.m.</i></b> | <b><i>G.g.</i></b> | <b><i>A.p.</i></b> | <b><i>A.c.</i></b> | <b><i>A.cs.</i></b> | <b><i>F.a.</i></b> | <b><i>M.g.</i></b> | <b><i>P.s.</i></b> | <b><i>S.c.</i></b> | <b><i>T.g.</i></b> | <b><i>T.gt.</i></b> | <b><i>T.a.</i></b> |
|---------------------|-------------------|--------------------|--------------------|--------------------|--------------------|---------------------|--------------------|--------------------|--------------------|--------------------|--------------------|---------------------|--------------------|
| SLC8                | 3                 | 5                  | 2                  | 2                  | 6                  | 3                   | 3                  | 2                  | 4                  | 2                  | 2                  | 2                   | 2                  |
| SLC9                | 11                | 10                 | 11                 | 10                 | 9                  | 9                   | 10                 | 10                 | 10                 | 9                  | 11                 | 9                   | 8                  |

**Supplementary Table S8.** Gene Ontology categories enriched for genes, which evolve faster in kiwi; (A) kiwi-specific and (B) shared with any of the other tested *Palaeognathae* (ostrich, tinamou) or nocturnal birds (chuck-will's-widow, barn owl). The enrichment was performed using a hypergeometric test [19] on genes evolving significantly faster in kiwi. The background species considered in CODEML [9] were chicken, turkey, zebra finch, ostrich, tinamou, chuck-will's-widow, and barn owl. (C) Genes belonging to the potentially biological relevant categories for kiwi's specific physiology. None of the categories remained significant after family-wise error rate multiple testing correction.

A)

| Node name                                           | Node ID           | No. genes in node | No. significant genes | Raw p over representation |
|-----------------------------------------------------|-------------------|-------------------|-----------------------|---------------------------|
| <b>Biological process</b>                           |                   |                   |                       |                           |
| oxidation-reduction process                         | GO:0055114        | 637               | 43                    | 0.001                     |
| protein targeting                                   | GO:0006605        | 270               | 18                    | 0.024                     |
| small molecule catabolic process                    | GO:0044282        | 124               | 10                    | 0.027                     |
| single-organism catabolic process                   | GO:0044712        | 124               | 10                    | 0.027                     |
| response to alcohol                                 | GO:0097305        | 76                | 9                     | 0.003                     |
| <b>visual perception</b>                            | <b>GO:0007601</b> | <b>96</b>         | <b>9</b>              | <b>0.015</b>              |
| regulation of ERK1 and ERK2 cascade                 | GO:0070372        | 112               | 9                     | 0.036                     |
| ERK1 and ERK2 cascade                               | GO:0070371        | 117               | 9                     | 0.046                     |
| organic acid catabolic process                      | GO:0016054        | 95                | 8                     | 0.037                     |
| regulation of leukocyte mediated immunity           | GO:0002703        | 78                | 7                     | 0.037                     |
| establishment of protein localization to organelle  | GO:0072594        | 82                | 7                     | 0.046                     |
| response to ethanol                                 | GO:0045471        | 23                | 6                     | <0.001                    |
| histone ubiquitination                              | GO:0016574        | 32                | 6                     | 0.002                     |
| protein targeting to membrane                       | GO:0006612        | 50                | 6                     | 0.014                     |
| positive regulation of epithelial cell migration    | GO:0010634        | 60                | 6                     | 0.033                     |
| spermatid development                               | GO:0007286        | 63                | 6                     | 0.040                     |
| endothelial cell proliferation                      | GO:0001935        | 64                | 6                     | 0.043                     |
| spermatid differentiation                           | GO:0048515        | 65                | 6                     | 0.046                     |
| negative regulation of TOR signaling cascade        | GO:0032007        | 17                | 5                     | <0.001                    |
| ER-associated protein catabolic process             | GO:0030433        | 30                | 5                     | 0.006                     |
| peptidyl-proline modification                       | GO:0018208        | 38                | 5                     | 0.017                     |
| regulation of TOR signaling cascade                 | GO:0032006        | 38                | 5                     | 0.017                     |
| glycogen metabolic process                          | GO:0005977        | 43                | 5                     | 0.028                     |
| cellular glucan metabolic process                   | GO:0006073        | 43                | 5                     | 0.028                     |
| purine nucleoside triphosphate biosynthetic process | GO:0009145        | 43                | 5                     | 0.028                     |
| glucan metabolic process                            | GO:0044042        | 43                | 5                     | 0.028                     |
| negative regulation of angiogenesis                 | GO:0016525        | 45                | 5                     | 0.033                     |



| Node name                                                         | Node ID           | No. genes in node | No. significant genes | Raw p over representation |
|-------------------------------------------------------------------|-------------------|-------------------|-----------------------|---------------------------|
| monocarboxylic acid catabolic process                             | GO:0072329        | 45                | 5                     | 0.033                     |
| <b>energy reserve metabolic process</b>                           | <b>GO:0006112</b> | <b>47</b>         | <b>5</b>              | <b>0.039</b>              |
| organophosphate ester transport                                   | GO:0015748        | 47                | 5                     | 0.039                     |
| TOR signaling cascade                                             | GO:0031929        | 47                | 5                     | 0.039                     |
| regulation of interleukin-6 production                            | GO:0032675        | 48                | 5                     | 0.042                     |
| acrosome assembly                                                 | GO:0001675        | 9                 | 4                     | <0.001                    |
| histone H2A ubiquitination                                        | GO:0033522        | 17                | 4                     | 0.004                     |
| amino sugar metabolic process                                     | GO:0006040        | 22                | 4                     | 0.011                     |
| fatty acid beta-oxidation                                         | GO:0006635        | 25                | 4                     | 0.017                     |
| regulation of smooth muscle contraction                           | GO:0006940        | 26                | 4                     | 0.019                     |
| <b>feeding behavior</b>                                           | <b>GO:0007631</b> | <b>40</b>         | <b>4</b>              | <b>0.021</b>              |
| protein peptidyl-prolyl isomerization                             | GO:0000413        | 27                | 4                     | 0.022                     |
| axon cargo transport                                              | GO:0008088        | 27                | 4                     | 0.022                     |
| RNA phosphodiester bond hydrolysis, endonucleolytic               | GO:0090502        | 28                | 4                     | 0.024                     |
| <b>eye photoreceptor cell differentiation</b>                     | <b>GO:0001754</b> | <b>30</b>         | <b>4</b>              | <b>0.031</b>              |
| translational elongation                                          | GO:0006414        | 31                | 4                     | 0.034                     |
| ATP biosynthetic process                                          | GO:0006754        | 31                | 4                     | 0.034                     |
| protein autoubiquitination                                        | GO:0051865        | 31                | 4                     | 0.034                     |
| negative regulation of smooth muscle contraction                  | GO:0045986        | 7                 | 3                     | 0.002                     |
| negative regulation of muscle contraction                         | GO:0045932        | 9                 | 3                     | 0.005                     |
| regulation of translational fidelity                              | GO:0006450        | 10                | 3                     | 0.006                     |
| histone H2A acetylation                                           | GO:0043968        | 11                | 3                     | 0.008                     |
| protein-chromophore linkage                                       | GO:0018298        | 12                | 3                     | 0.011                     |
| peptide hormone processing                                        | GO:0016486        | 13                | 3                     | 0.014                     |
| negative regulation of purine nucleotide metabolic process        | GO:1900543        | 14                | 3                     | 0.017                     |
| negative regulation of muscle tissue development                  | GO:1901862        | 14                | 3                     | 0.017                     |
| regulation of translational elongation                            | GO:0006448        | 15                | 3                     | 0.020                     |
| negative regulation of nucleotide metabolic process               | GO:0045980        | 15                | 3                     | 0.020                     |
| regulation of actin cytoskeleton reorganization                   | GO:2000249        | 15                | 3                     | 0.020                     |
| nuclear envelope organization                                     | GO:0006998        | 16                | 3                     | 0.024                     |
| gamma-aminobutyric acid signaling pathway                         | GO:0007214        | 16                | 3                     | 0.024                     |
| protein localization to vacuole                                   | GO:0072665        | 17                | 3                     | 0.029                     |
| synaptic transmission, dopaminergic                               | GO:0001963        | 18                | 3                     | 0.033                     |
| histone monoubiquitination                                        | GO:0010390        | 19                | 3                     | 0.039                     |
| glycogen biosynthetic process                                     | GO:0005978        | 21                | 3                     | 0.050                     |
| glucan biosynthetic process                                       | GO:0009250        | 21                | 3                     | 0.050                     |
| positive regulation vascular endothelial growth factor production | GO:0010575        | 21                | 3                     | 0.050                     |

| Node name                                                  | Node ID           | No. genes in node | No. significant genes | Raw p over representation |
|------------------------------------------------------------|-------------------|-------------------|-----------------------|---------------------------|
| <b>Cellular component</b>                                  |                   |                   |                       |                           |
| <b>mitochondrion</b>                                       | <b>GO:0005739</b> | <b>1069</b>       | <b>54</b>             | <b>0.020</b>              |
| vacuolar part                                              | GO:0044437        | 158               | 14                    | 0.003                     |
| lysosomal membrane                                         | GO:0005765        | 126               | 10                    | 0.023                     |
| histone acetyltransferase complex                          | GO:0000123        | 69                | 7                     | 0.016                     |
| peroxisome                                                 | GO:0005777        | 77                | 7                     | 0.028                     |
| microbody                                                  | GO:0042579        | 77                | 7                     | 0.028                     |
| Cul5-RING ubiquitin ligase complex                         | GO:0031466        | 5                 | 3                     | 0.001                     |
| Swr1 complex                                               | GO:0000812        | 7                 | 3                     | 0.002                     |
| costamere                                                  | GO:0043034        | 13                | 3                     | 0.012                     |
| NuA4 histone acetyltransferase complex                     | GO:0035267        | 14                | 3                     | 0.015                     |
| H4/H2A histone acetyltransferase complex                   | GO:0043189        | 15                | 3                     | 0.018                     |
| INO80-type complex                                         | GO:0097346        | 15                | 3                     | 0.018                     |
| presynaptic membrane                                       | GO:0042734        | 19                | 3                     | 0.034                     |
| SAGA-type complex                                          | GO:0070461        | 19                | 3                     | 0.034                     |
| small nuclear ribonucleoprotein complex                    | GO:0030532        | 20                | 3                     | 0.039                     |
| <b>Molecular function</b>                                  |                   |                   |                       |                           |
| oxidoreductase activity                                    | GO:0016491        | 569               | 35                    | 0.004                     |
| ligase activity                                            | GO:0016874        | 337               | 23                    | 0.006                     |
| ligase activity, forming carbon-nitrogen bonds             | GO:0016879        | 259               | 19                    | 0.005                     |
| acid-amino acid ligase activity                            | GO:0016881        | 232               | 18                    | 0.004                     |
| small conjugating protein ligase activity                  | GO:0019787        | 212               | 17                    | 0.003                     |
| ubiquitin-protein ligase activity                          | GO:0004842        | 191               | 16                    | 0.003                     |
| protein complex binding                                    | GO:0032403        | 244               | 15                    | 0.049                     |
| magnesium ion binding                                      | GO:0000287        | 129               | 12                    | 0.004                     |
| isomerase activity                                         | GO:0016853        | 100               | 10                    | 0.005                     |
| hydrolase activity, acting on glycosyl bonds               | GO:0016798        | 98                | 8                     | 0.035                     |
| cation-transporting ATPase activity                        | GO:0019829        | 55                | 6                     | 0.018                     |
| transmembrane receptor protein kinase activity             | GO:0019199        | 62                | 6                     | 0.031                     |
| drug binding                                               | GO:0008144        | 33                | 5                     | 0.008                     |
| methylated histone residue binding                         | GO:0035064        | 36                | 5                     | 0.012                     |
| transmembrane receptor protein tyrosine kinase activity    | GO:0004714        | 47                | 5                     | 0.033                     |
| intramolecular transferase activity                        | GO:0016866        | 23                | 4                     | 0.011                     |
| ATPase activity, coupled to transmembrane movement of ions | GO:0042625        | 55                | 4                     | 0.018                     |
| cis-trans isomerase activity                               | GO:0016859        | 31                | 4                     | 0.030                     |
| aminoacyl-tRNA editing activity                            | GO:0002161        | 8                 | 3                     | 0.003                     |
| GDP-dissociation inhibitor activity                        | GO:0005092        | 8                 | 3                     | 0.003                     |
| signal sequence binding                                    | GO:0005048        | 12                | 3                     | 0.010                     |
| thyroid hormone receptor binding                           | GO:0046966        | 15                | 3                     | 0.018                     |
| hyaluronic acid binding                                    | GO:0005540        | 17                | 3                     | 0.026                     |
| GABA-A receptor activity                                   | GO:0004890        | 18                | 3                     | 0.030                     |

| Node name                                            | Node ID    | No. genes in node | No. significant genes | Raw p over representation |
|------------------------------------------------------|------------|-------------------|-----------------------|---------------------------|
| tumor necrosis factor receptor binding               | GO:0005164 | 18                | 3                     | 0.030                     |
| hydrolase activity, hydrolyzing N-glycosyl compounds | GO:0016799 | 19                | 3                     | 0.035                     |
| neurotransmitter:sodium symporter activity           | GO:0005328 | 20                | 3                     | 0.039                     |
| GABA receptor activity                               | GO:0016917 | 20                | 3                     | 0.039                     |

B)

| Node name                                                         | Node ID           | No. genes in node | No. significant genes | Raw p over representation | Other species      |
|-------------------------------------------------------------------|-------------------|-------------------|-----------------------|---------------------------|--------------------|
| generation of precursor metabolites and energy                    | GO:0006091        | 161               | 14                    | 0.005                     | chuck-will's-widow |
| energy derivation by oxidation of organic compounds               | GO:0015980        | 116               | 9                     | 0.044                     | chuck-will's-widow |
| regulation of production of molecular mediator of immune response | GO:0002700        | 47                | 5                     | 0.039                     | chuck-will's-widow |
| regulation of B cell mediated immunity                            | GO:0002712        | 19                | 3                     | 0.039                     | chuck-will's-widow |
| regulation of immunoglobulin mediated immune response             | GO:0002889        | 19                | 3                     | 0.039                     | chuck-will's-widow |
| cofactor binding                                                  | GO:0048037        | 221               | 14                    | 0.046                     | chuck-will's-widow |
| coenzyme binding                                                  | GO:0050662        | 157               | 11                    | 0.040                     | chuck-will's-widow |
| flavin adenine dinucleotide binding                               | GO:0050660        | 61                | 9                     | <0.001                    | widow              |
| nucleotide-sugar metabolic process                                | GO:0009225        | 16                | 4                     | 0.003                     | barn owl           |
| peptidyl-prolyl cis-trans isomerase activity                      | GO:0003755        | 29                | 4                     | 0.024                     | barn owl           |
| hydrogen peroxide metabolic process                               | GO:0042743        | 13                | 3                     | 0.014                     | ostrich, tinamou   |
| vacuolar membrane                                                 | GO:0005774        | 154               | 13                    | 0.006                     | ostrich, tinamou   |
| apical part of cell                                               | GO:0045177        | 162               | 11                    | 0.047                     | ostrich, tinamou   |
| ribonuclease activity                                             | GO:0004540        | 50                | 5                     | 0.042                     | ostrich, tinamou   |
| <b>sensory perception of light stimulus</b>                       | <b>GO:0050953</b> | <b>98</b>         | <b>9</b>              | <b>0.017</b>              | <b>ostrich</b>     |
| carboxylic acid catabolic process                                 | GO:0046395        | 95                | 8                     | 0.037                     | ostrich            |
| purine ribonucleoside                                             | GO:0009206        | 42                | 5                     | 0.026                     | ostrich            |

triphosphate biosynthetic process

| Node name                                                       | Node ID           | No. genes in node | No. significant genes | Raw p over representation | Other species  |
|-----------------------------------------------------------------|-------------------|-------------------|-----------------------|---------------------------|----------------|
| ribonucleoside triphosphate biosynthetic process                | GO:0009201        | 48                | 5                     | 0.042                     | ostrich        |
| RNA phosphodiester bond hydrolysis                              | GO:0090501        | 49                | 5                     | 0.046                     | ostrich        |
| superoxide anion generation                                     | GO:0042554        | 14                | 3                     | 0.017                     | ostrich        |
| endoribonuclease activity                                       | GO:0004521        | 25                | 4                     | 0.014                     | ostrich        |
| <b>photoreceptor activity</b>                                   | <b>GO:0009881</b> | <b>15</b>         | <b>3</b>              | <b>0.018</b>              | <b>ostrich</b> |
| nucleus organization                                            | GO:0006997        | 62                | 6                     | 0.037                     | tinamou        |
| transferase activity, transferring phosphorus-containing groups | GO:0016772        | 767               | 39                    | 0.044                     | tinamou        |
| ephrin receptor activity                                        | GO:0005003        | 13                | 3                     | 0.012                     | tinamou        |

C) \*LRT = Likelihood ratio test between kiwi as foreground (model = 2) and the null model (model = 0) as calculated by PAML package [9].

| Gene Name                                                                                                                                                                  | <i>Apteryx mantelli</i> gene ID                      | <i>Gallus gallus</i> gene ID | $\omega$ background | $\omega$ <i>Apteryx mantelli</i> | LRT    |
|----------------------------------------------------------------------------------------------------------------------------------------------------------------------------|------------------------------------------------------|------------------------------|---------------------|----------------------------------|--------|
| <b>eye photoreceptor cell differentiation GO:0001754, sensory perception of light stimulus GO:0050953, visual perception GO:0007601, photoreceptor activity GO:0009881</b> |                                                      |                              |                     |                                  |        |
| <i>MYO7A</i>                                                                                                                                                               | maker-scaffold492-augustus-gene-3.1-mRNA-1           | ENSGALG00000000733           | 0.001               | 0.076                            | 4.159  |
| <i>TRPM1</i>                                                                                                                                                               | augustus_masked-scaffold71-abinit-gene-52.1-mRNA-1   | ENSGALG00000003849           | 0.045               | 0.393                            | 16.202 |
| <i>RGS9BP</i>                                                                                                                                                              | augustus_masked-scaffold150-abinit-gene-103.0-mRNA-1 | ENSGALG00000004675           | 0.022               | 0.150                            | 6.113  |
| <i>PDE6C</i>                                                                                                                                                               | augustus_masked-scaffold37-abinit-gene-1.1-mRNA-1    | ENSGALG00000006626           | 0.027               | 0.185                            | 6.013  |
| <i>RRH</i>                                                                                                                                                                 | maker-scaffold39-augustus-gene-121.1-mRNA-1          | ENSGALG00000012181           | 0.126               | 0.922                            | 8.455  |
| <i>GABRR2</i>                                                                                                                                                              | maker-scaffold3-augustus-gene-55.4-mRNA-1            | ENSGALG00000015776           | 0.026               | 0.241                            | 7.893  |
| <i>cOpn5L2</i>                                                                                                                                                             | augustus_masked-scaffold1066-abinit-gene-0.4-mRNA-1  | ENSGALG00000016699           | 0.067               | 0.409                            | 10.793 |
| <i>CLN5</i>                                                                                                                                                                | augustus_masked-scaffold38-abinit-gene-112.0-mRNA-1  | ENSGALG00000016917           | 0.108               | 0.373                            | 4.199  |
| No ID                                                                                                                                                                      | augustus_masked-scaffold50-abinit-gene-143.1-mRNA-1  | ENSGALG00000016802           | 0.110               | 0.666                            | 9.416  |
| <b>feeding behavior GO:0007631</b>                                                                                                                                         |                                                      |                              |                     |                                  |        |
| <i>CCK</i>                                                                                                                                                                 | maker-scaffold354-augustus-gene-73.4-mRNA-1          | ENSGALG00000011940           | 0.133               | 0.724                            | 5.977  |
| <i>DRD2</i>                                                                                                                                                                | augustus_masked-scaffold835-abinit-gene-0.0-mRNA-1   | ENSGALG00000007794           | 0.046               | 0.407                            | 6.569  |
| <i>STRA6</i>                                                                                                                                                               | augustus_masked-scaffold1289-abinit-gene-1.5-mRNA-1  | ENSGALG00000001449           | 0.089               | 1.651                            | 11.377 |
| <i>HTR2C</i>                                                                                                                                                               | augustus_masked-scaffold4345-abinit-gene-0.0-mRNA-1  | ENSGALG00000005853           | 0.067               | 0.703                            | 9.006  |
| <b>energy reserve metabolic process GO:0006112</b>                                                                                                                         |                                                      |                              |                     |                                  |        |
| <i>STK40</i>                                                                                                                                                               | maker-scaffold34-augustus-gene-7.6-mRNA-1            | ENSGALG00000002130           | 0.006               | 0.223                            | 25.001 |
| <i>PHKB</i>                                                                                                                                                                | maker-scaffold150-augustus-gene-70.2-mRNA-1          | ENSGALG00000004004           | 0.074               | 0.427                            | 10.626 |
| <i>AGL</i>                                                                                                                                                                 | augustus_masked-scaffold121-abinit-gene-92.0-mRNA-1  | ENSGALG00000005407           | 0.100               | 0.209                            | 12.094 |
| <i>GYS2</i>                                                                                                                                                                | augustus_masked-scaffold27-abinit-gene-541.0-mRNA-1  | ENSGALG00000013265           | 0.030               | 0.448                            | 4.813  |
| <i>GBE1</i>                                                                                                                                                                | maker-scaffold33-augustus-gene-186.4-mRNA-1          | ENSGALG00000015506           | 0.086               | 0.832                            | 6.413  |
| <b>Mitochondrion GO:0005739</b>                                                                                                                                            |                                                      |                              |                     |                                  |        |
| <i>HEATR1</i>                                                                                                                                                              | maker-scaffold19-augustus-gene-3.1-mRNA-1            | ENSGALG00000000258           | 0.099               | 0.489                            | 4.423  |
| <i>C20H20ORF24</i>                                                                                                                                                         | augustus_masked-scaffold123-abinit-gene-7.1-mRNA-1   | ENSGALG00000001054           | 0.027               | 0.275                            | 3.972  |
| <i>ACO1</i>                                                                                                                                                                | maker-scaffold1547-augustus-gene-2.3-mRNA-1          | ENSGALG00000002159           | 0.179               | 0.542                            | 9.082  |

| Gene Name      | <i>Apteryx mantelli</i> gene ID                      | <i>Gallus gallus</i> gene ID | $\omega$ background | $\omega$ <i>Apteryx mantelli</i> | LRT    |
|----------------|------------------------------------------------------|------------------------------|---------------------|----------------------------------|--------|
| <i>GOT2</i>    | maker-scaffold548-augustus-gene-13.2-mRNA-1          | ENSGALG00000002321           | 0.053               | 0.195                            | 5.830  |
| <i>POLDIP2</i> | maker-scaffold1645-augustus-gene-3.14-mRNA-1         | ENSGALG00000003211           | 0.004               | 0.210                            | 27.921 |
| <i>LACTB</i>   | maker-scaffold71-augustus-gene-30.1-mRNA-1           | ENSGALG00000003505           | 0.129               | 0.333                            | 4.896  |
| <i>HK1</i>     | augustus_masked-scaffold312-abinit-gene-0.0-mRNA-1   | ENSGALG00000004222           | 0.012               | 0.039                            | 5.689  |
| <i>AIFM2</i>   | augustus_masked-scaffold1638-abinit-gene-1.1-mRNA-1  | ENSGALG00000004777           | 0.174               | 2.824                            | 5.912  |
| <i>PEMT</i>    | maker-scaffold2428-augustus-gene-3.1-mRNA-1          | ENSGALG00000004875           | 0.094               | 0.720                            | 7.871  |
| <i>CHDH</i>    | maker-scaffold105-augustus-gene-2.2-mRNA-1           | ENSGALG00000005363           | 0.095               | 0.429                            | 5.861  |
| No ID          | maker-scaffold1167-augustus-gene-3.1-mRNA-1          | ENSGALG00000005494           | 0.026               | 0.315                            | 6.166  |
| <i>PDE12</i>   | augustus_masked-scaffold815-abinit-gene-3.0-mRNA-1   | ENSGALG00000005620           | 0.117               | 0.212                            | 4.041  |
| <i>BCL2A1</i>  | augustus_masked-scaffold118-abinit-gene-5.0-mRNA-1   | ENSGALG00000006511           | 0.160               | 0.564                            | 8.542  |
| <i>HSPA4</i>   | maker-scaffold241-augustus-gene-24.7-mRNA-1          | ENSGALG00000007273           | 0.060               | 0.306                            | 18.624 |
| <i>MPP7</i>    | maker-scaffold308-augustus-gene-59.3-mRNA-1          | ENSGALG00000007408           | 0.033               | 1.015                            | 31.363 |
| <i>ICT1</i>    | maker-scaffold1928-augustus-gene-7.13-mRNA-1         | ENSGALG00000007822           | 0.107               | 1.010                            | 11.852 |
| <i>TRAF6</i>   | augustus_masked-scaffold87-abinit-gene-135.1-mRNA-1  | ENSGALG00000007932           | 0.073               | 0.604                            | 13.019 |
| <i>ATG13</i>   | augustus_masked-scaffold87-abinit-gene-79.3-mRNA-1   | ENSGALG00000008347           | 0.044               | 0.196                            | 4.268  |
| <i>NDUFA5</i>  | maker-scaffold677-augustus-gene-25.6-mRNA-1          | ENSGALG00000008821           | 0.083               | 157.881                          | 3.947  |
| No ID          | augustus_masked-scaffold121-abinit-gene-155.2-mRNA-1 | ENSGALG00000008834           | 0.270               | 1.259                            | 3.994  |
| <i>ADCK3</i>   | maker-scaffold147-augustus-gene-13.3-mRNA-1          | ENSGALG00000009082           | 0.056               | 0.188                            | 7.158  |
| <i>CRLS1</i>   | maker-scaffold10-augustus-gene-41.2-mRNA-1           | ENSGALG00000009214           | 0.007               | 0.284                            | 13.245 |
| <i>IARS2</i>   | augustus_masked-scaffold32-abinit-gene-90.0-mRNA-1   | ENSGALG00000009566           | 0.131               | 0.302                            | 5.423  |
| <i>FLVCR1</i>  | maker-scaffold32-augustus-gene-52.2-mRNA-1           | ENSGALG00000009807           | 0.065               | 1.369                            | 7.988  |
| <i>MRPS18A</i> | augustus_masked-scaffold19-abinit-gene-96.2-mRNA-1   | ENSGALG00000010296           | 0.137               | 1.173                            | 9.235  |
| <i>ALKBH1</i>  | augustus_masked-scaffold15-abinit-gene-146.0-mRNA-1  | ENSGALG00000010485           | 0.183               | 0.501                            | 6.287  |
| <i>ADCK1</i>   | maker-scaffold15-augustus-gene-147.3-mRNA-1          | ENSGALG00000010504           | 0.050               | 0.340                            | 4.968  |
| <i>SNX13</i>   | augustus_masked-scaffold151-abinit-gene-120.0-mRNA-1 | ENSGALG00000010840           | 0.037               | 0.200                            | 7.427  |
| <i>LARS2</i>   | augustus_masked-scaffold354-abinit-gene-61.0-mRNA-1  | ENSGALG00000011877           | 0.166               | 0.400                            | 4.529  |
| <i>XPNPEP3</i> | augustus_masked-scaffold27-abinit-gene-324.0-mRNA-1  | ENSGALG00000012003           | 0.160               | 0.536                            | 4.591  |

| <b>Gene Name</b> | <b><i>Apteryx mantelli</i> gene ID</b>              | <b><i>Gallus gallus</i> gene ID</b> | <b><math>\omega</math> background</b> | <b><math>\omega</math> <i>Apteryx mantelli</i></b> | <b>LRT</b> |
|------------------|-----------------------------------------------------|-------------------------------------|---------------------------------------|----------------------------------------------------|------------|
| <i>CCDC109B</i>  | maker-scaffold39-augustus-gene-119.1-mRNA-1         | ENSGALG00000012196                  | 0.140                                 | 0.842                                              | 10.239     |
| <i>PPP3CA</i>    | maker-scaffold39-augustus-gene-84.3-mRNA-1          | ENSGALG00000012280                  | <0.001                                | 0.686                                              | 36.131     |
| <i>FASTKD3</i>   | maker-scaffold110-augustus-gene-14.6-mRNA-1         | ENSGALG00000013054                  | 0.350                                 | 1.458                                              | 9.075      |
| <i>SAMM50</i>    | maker-scaffold27-augustus-gene-567.3-mRNA-1         | ENSGALG00000014194                  | 0.033                                 | 0.771                                              | 32.540     |
| <i>MRPL39</i>    | maker-scaffold57-augustus-gene-38.1-mRNA-1          | ENSGALG00000015742                  | 0.105                                 | 0.888                                              | 7.592      |
| <i>SOD1</i>      | augustus_masked-scaffold57-abinit-gene-64.1-mRNA-1  | ENSGALG00000015844                  | 0.169                                 | 1.206                                              | 7.717      |
| No ID            | augustus_masked-scaffold57-abinit-gene-77.0-mRNA-1  | ENSGALG00000016007                  | 0.080                                 | 0.403                                              | 5.759      |
| <i>AGPAT5</i>    | maker-scaffold45-augustus-gene-10.1-mRNA-1          | ENSGALG00000016329                  | 0.208                                 | 1.384                                              | 7.099      |
| <i>Tpo</i>       | augustus_masked-scaffold693-abinit-gene-9.0-mRNA-1  | ENSGALG00000016370                  | 0.075                                 | 6.023                                              | 7.469      |
| <i>RSAD2</i>     | augustus_masked-scaffold55-abinit-gene-11.1-mRNA-1  | ENSGALG00000016400                  | 0.135                                 | 0.653                                              | 8.632      |
| <i>MRPL48</i>    | maker-scaffold289-augustus-gene-0.3-mRNA-1          | ENSGALG00000017319                  | 0.090                                 | 0.305                                              | 3.889      |
| <i>PICK1</i>     | augustus_masked-scaffold27-abinit-gene-341.2-mRNA-1 | ENSGALG00000019313                  | 0.016                                 | 0.146                                              | 4.794      |
| <i>UNG</i>       | augustus_masked-scaffold1033-abinit-gene-3.3-mRNA-1 | ENSGALG00000021285                  | 0.032                                 | 0.333                                              | 7.037      |
| <i>FEN1</i>      | augustus_masked-scaffold1654-abinit-gene-0.2-mRNA-1 | ENSGALG00000024076                  | 0.027                                 | 0.139                                              | 6.155      |

**Supplementary Table S9.** Gene Ontology categories enriched for genes, which evolve slower in kiwi; (A) kiwi-specific and (B) shared with any of the other tested *Palaeognathae* (ostrich and tinamou) or nocturnal birds (chuck-will's-widow and barn owl). The enrichment was performed using a hypergeometric test [19] on genes evolving significantly slower in kiwi. The background species considered in CODEML [9] were chicken, turkey, zebra finch, ostrich, tinamou, chuck-will's-widow, and barn owl. (C) Genes belonging to the potentially biological relevant categories for kiwi's specific physiology. None of the categories remained significant after family-wise error rate multiple testing correction.

A)

| Node name                                         | Node ID           | No. genes in node | No. significant genes | Raw p over representation |
|---------------------------------------------------|-------------------|-------------------|-----------------------|---------------------------|
| cellular amino acid biosynthetic process          | GO:0008652        | 67                | 4                     | 0.004                     |
| negative regulation of catabolic process          | GO:0009895        | 68                | 4                     | 0.005                     |
| regulation of ligase activity                     | GO:0051340        | 25                | 3                     | 0.002                     |
| cellular modified amino acid biosynthetic process | GO:0042398        | 29                | 3                     | 0.003                     |
| negative regulation of cellular catabolic process | GO:0031330        | 42                | 3                     | 0.008                     |
| protein deacetylation                             | GO:0006476        | 49                | 3                     | 0.012                     |
| protein deacylation                               | GO:0035601        | 52                | 3                     | 0.015                     |
| sulfur compound biosynthetic process              | GO:0044272        | 55                | 3                     | 0.017                     |
| B cell proliferation                              | GO:0042100        | 60                | 3                     | 0.021                     |
| chromosome, telomeric region                      | GO:0000781        | 36                | 3                     | 0.005                     |
| <b>mitochondrial outer membrane</b>               | <b>GO:0005741</b> | <b>56</b>         | <b>3</b>              | <b>0.018</b>              |
| mRNA binding                                      | GO:0003729        | 80                | 4                     | 0.008                     |
| double-stranded RNA binding                       | GO:0003725        | 33                | 3                     | 0.004                     |
| chaperone binding                                 | GO:0051087        | 37                | 3                     | 0.006                     |
| unfolded protein binding                          | GO:0051082        | 53                | 3                     | 0.016                     |

B)

| Node name                                  | Node ID           | No. genes in node | No. significant genes | Raw p over representation | Other species             |
|--------------------------------------------|-------------------|-------------------|-----------------------|---------------------------|---------------------------|
| <b>anion channel activity</b>              | <b>GO:0005253</b> | <b>49</b>         | <b>3</b>              | <b>0.013</b>              | <b>chuck-will's-widow</b> |
| cell aging                                 | GO:0007569        | 58                | 3                     | 0.020                     | ostrich                   |
| negative regulation of proteasomal protein | GO:1901799        | 19                | 3                     | 0.001                     | tinamou                   |



catabolic process

| <b>Node name</b>                                    | <b>Node ID</b> | <b>No.<br/>genes<br/>in<br/>node</b> | <b>No.<br/>significant<br/>genes</b> | <b>Raw p over<br/>representation</b> | <b>Other<br/>species</b> |
|-----------------------------------------------------|----------------|--------------------------------------|--------------------------------------|--------------------------------------|--------------------------|
| negative regulation of<br>proteolysis               | GO:0045861     | 32                                   | 3                                    | 0.004                                | tinamou                  |
| telomere maintenance                                | GO:0000723     | 33                                   | 3                                    | 0.004                                | tinamou                  |
| telomere organization                               | GO:0032200     | 33                                   | 3                                    | 0.004                                | tinamou                  |
| negative regulation of<br>protein catabolic process | GO:0042177     | 41                                   | 3                                    | 0.008                                | tinamou                  |

C)

| Gene Name                                      | <i>Apteryx mantelli</i> gene ID                     | <i>Gallus gallus</i> gene ID | $\omega$ background | $\omega$ <i>Apteryx mantelli</i> | LRT   |
|------------------------------------------------|-----------------------------------------------------|------------------------------|---------------------|----------------------------------|-------|
| <b>anion channel activity GO:0005253</b>       |                                                     |                              |                     |                                  |       |
| <i>VDAC2</i>                                   | maker-scaffold241-augustus-gene-43.2-mRNA-1         | ENSGALG00000005002           | 0.034               | 0.007                            | 5.753 |
| <i>CLIC4</i>                                   | augustus_masked-scaffold57-abinit-gene-82.0-mRNA-1  | ENSGALG00000001262           | 0.031               | 0.002                            | 5.057 |
| <i>NMUR2</i>                                   | augustus_masked-scaffold1749-abinit-gene-0.0-mRNA-1 | ENSGALG00000004101           | 0.049               | 0.004                            | 5.070 |
| <b>mitochondrial outer membrane GO:0005741</b> |                                                     |                              |                     |                                  |       |
| <i>VDAC2</i>                                   | maker-scaffold241-augustus-gene-43.2-mRNA-1         | ENSGALG00000005002           | 0.034               | 0.007                            | 5.753 |
| <i>TMEM173</i>                                 | augustus_masked-scaffold517-abinit-gene-13.1-mRNA-1 | ENSGALG00000000852           | 0.275               | <0.001                           | 4.002 |
| <i>SPATA18</i>                                 | augustus_masked-scaffold31-abinit-gene-56.0-mRNA-1  | ENSGALG00000013964           | 0.363               | <0.001                           | 5.251 |

**Supplementary Table S10.** Selection scan on opsins in kiwi, chuck-will's-widow, barn owl ostrich, tinamou, chicken, turkey, and zebra finch.

LRT1 = likelihood ratio testing with one degree of freedom, between the null model (model = 0) and a model where the appointed branch differs from the other birds (model = 2), implemented in CODEML from the PAML package.

LRT2 = likelihood ratio testing with one degree of freedom, between the model 2 with estimated  $\omega$  and the model 2 with  $\omega$  fixed to 1 (neutral evolution).

\*  $\omega = 999.000$  shows the absence of synonymous differences (the ratio is estimated to be infinity, while LRT is not affected) [9].

| <b><i>RHO</i></b>    | <b><math>\omega</math> background</b> | <b><math>\omega</math> foreground</b> | <b>LRT1</b> | <b>LRT2</b> |
|----------------------|---------------------------------------|---------------------------------------|-------------|-------------|
| kiwi                 | 0.044                                 | 0.149                                 | 6.128       | 16.705      |
| chuck-will's-widow   | 0.043                                 | 0.143                                 | 6.631       | 22.917      |
| barn owl             | 0.055                                 | 0.146                                 | 0.421       | 1.215       |
| ostrich              | 0.052                                 | 0.125                                 | 1.444       | 7.610       |
| tinamou              | 0.067                                 | <0.001                                | 10.336      | 62.053      |
| <b><i>OPN1LW</i></b> | <b><math>\omega</math> background</b> | <b><math>\omega</math> foreground</b> | <b>LRT1</b> | <b>LRT2</b> |
| kiwi                 | 0.156                                 | 0.597                                 | 1.503       | 0.078       |
| chuck-will's-widow   | 0.156                                 | 999.000                               | 1.762       | 0.230       |
| barn owl             | 0.122                                 | 0.529                                 | 6.898       | 1.290       |
| ostrich              | 0.180                                 | 0.105                                 | 0.503       | 15.074      |
| tinamou              | 0.177                                 | 0.007                                 | 2.537       | 16.073      |
| <b><i>OPN1MW</i></b> | <b><math>\omega</math> background</b> | <b><math>\omega</math> foreground</b> | <b>LRT1</b> | <b>LRT2</b> |
| kiwi                 | 0.021                                 | 0.268                                 | 44.951      | 10.505      |
| chuck-will's-widow   | 0.033                                 | 0.045                                 | 0.669       | 105.178     |
| barn owl             | 0.035                                 | <0.001                                | -0.003      | 0.001       |
| ostrich              | 0.037                                 | 0.008                                 | 3.396       | 41.691      |
| tinamou              | 0.038                                 | 0.019                                 | 1.878       | 93.631      |
| <b><i>OPN3</i></b>   | <b><math>\omega</math> background</b> | <b><math>\omega</math> foreground</b> | <b>LRT1</b> | <b>LRT2</b> |
| kiwi                 | 0.110                                 | 0.542                                 | 3.211       | 0.469       |
| chuck-will's-widow   | 0.110                                 | 0.232                                 | 1.652       | 8.469       |
| barn owl             | 0.119                                 | 999.000                               | 3.030       | 0.716       |
| ostrich              | 0.123                                 | 0.122                                 | -0.001      | 12.624      |
| tinamou              | 0.106                                 | 0.237                                 | 2.063       | 8.724       |
| <b><i>OPN4-1</i></b> | <b><math>\omega</math> background</b> | <b><math>\omega</math> foreground</b> | <b>LRT1</b> | <b>LRT2</b> |
| kiwi                 | 0.142                                 | 0.231                                 | 2.733       | 1.548       |
| chuck-will's-widow   | 0.141                                 | 0.376                                 | 5.364       | 5.107       |
| barn owl             | 0.148                                 | 0.206                                 | 0.710       | 18.255      |
| ostrich              | 0.142                                 | 999.000                               | 3.603       | 0.044       |
| tinamou              | 0.162                                 | 0.070                                 | 0.900       | 0.900       |

| <b><i>OPN4-2</i></b>        | <b><math>\omega</math> background</b> | <b><math>\omega</math> foreground</b> | <b>LRT1</b> | <b>LRT2</b> |
|-----------------------------|---------------------------------------|---------------------------------------|-------------|-------------|
| kiwi                        | 0.186                                 | 2.574                                 | 8.194       | 0.884       |
| chuck-will's-widow          | 0.221                                 | 0.094                                 | 2.507       | 24.981      |
| barn owl                    | 0.190                                 | 0.487                                 | 2.509       | 1.519       |
| ostrich                     | 0.191                                 | 0.282                                 | 0.885       | 11.799      |
| tinamou                     | 0.221                                 | 0.156                                 | 0.968       | 38.517      |
| <b><i>OPN5</i></b>          | <b><math>\omega</math> background</b> | <b><math>\omega</math> foreground</b> | <b>LRT1</b> | <b>LRT2</b> |
| kiwi                        | 0.071                                 | <0.001                                | 1.733       | 12.097      |
| chuck-will's-widow          | 0.066                                 | 0.101                                 | 0.355       | 16.568      |
| barn owl                    | 0.069                                 | 0.069                                 | -0.001      | 15.557      |
| ostrich                     | 0.068                                 | 0.083                                 | 0.063       | 13.531      |
| tinamou                     | 0.077                                 | <0.001                                | 5.550       | 39.148      |
| <b><i>opsin-VA-like</i></b> | <b><math>\omega</math> background</b> | <b><math>\omega</math> foreground</b> | <b>LRT1</b> | <b>LRT2</b> |
| kiwi                        | 0.317                                 | 0.262                                 | 0.035       | 2.252       |
| chuck-will's-widow          | 0.324                                 | <0.001                                | 0.884       | 2.018       |
| barn owl                    | 0.254                                 | 1.266                                 | 1.560       | 0.036       |
| ostrich                     | 0.305                                 | 0.753                                 | <0.001      | <0.001      |
| tinamou                     | 0.305                                 | 0.331                                 | <0.001      | 0.082       |

**Supplementary Table S11.** Loss of ancestral footprint clusters in *HOX* genes. Differential loss of conserved, ancestral, non-coding DNA elements was quantitatively assessed in kiwi versus chicken and duck. No obvious change on the kiwi branch was found.

**Loss measures in number of footprints**

|      | present in: | lost in: |                      |                           |                         |
|------|-------------|----------|----------------------|---------------------------|-------------------------|
|      | 2 outgroups | All      | <i>Gallus gallus</i> | <i>Anas platyrhynchos</i> | <i>Apteryx mantelli</i> |
| HOXA | 694         | 211      | 81                   | 85                        | 60                      |
| HOXB | 698         | 181      | 121                  | 100                       | 85                      |
| HOXC | 442         | 38       | 126                  | 30                        | 56                      |
| HOXD | 589         | 144      | 51                   | 44                        | 43                      |

**Loss measures in number of nucleotides in footprints**

|      | present in: | lost in: |                      |                           |                         |
|------|-------------|----------|----------------------|---------------------------|-------------------------|
|      | 2 outgroups | all      | <i>Gallus gallus</i> | <i>Anas platyrhynchos</i> | <i>Apteryx mantelli</i> |
| HOXA | 19,332      | 8,848    | 1,241                | 1,944                     | 1,263                   |
| HOXB | 18,875      | 7,151    | 2,978                | 2,322                     | 2,266                   |
| HOXC | 10,606      | 1,663    | 3,411                | 606                       | 1,141                   |
| HOXD | 15,655      | 5,689    | 954                  | 917                       | 1,337                   |

**Supplementary Table S12.** Genes involved in limb development [4, 20-27] that were manually surveyed in the *AptMant0* genome.  $\omega$  (Ka/Ks ratio) was calculated using multiple alignments including kiwi and at least three other bird species from chicken, turkey, zebra finch, flycatcher, falcon, and rock dove with the program PAML [9].  $\omega_0$  is the average Ka/Ks ratio in all branches (model = 0),  $\omega_1$  is the average ratio in non-kiwi background branches (model = 2), and  $\omega_2$  is the ratio in kiwi (model = 2, kiwi appointed as foreground branch). LRT = Likelihood ratio test between kiwi as foreground and the null model (lines in bold denote a significant Chi square test, p-value < 0.05).

No obvious differences were noticed after comparative analysis with chicken, turkey, and zebra finch orthologous genes.

| External Gene ID    | <i>AptMant0</i> annotation ID                       | Involvement in limb development                                                        | $\omega_0$   | $\omega_1$   | $\omega_2$   | LRT          |
|---------------------|-----------------------------------------------------|----------------------------------------------------------------------------------------|--------------|--------------|--------------|--------------|
| <i>fgf4</i>         | maker-scaffold87-augustus-gene-159.3-mRNA-1         | Fgf signaling / can lead to ectopic limb formation                                     | 0.509        | 0.475        | 0.566        | 0.21         |
| <i>fgf7</i>         | augustus_masked-scaffold71-abinit-gene-124.0-mRNA-1 | Fgf signaling / can lead to ectopic limb formation                                     | 0.193        | 0.167        | 0.239        | 0.60         |
| <i>fgf8</i>         | augustus_masked-scaffold755-abinit-gene-1.0-mRNA-1  | Signals from intermediate mesoderm; Fgf signaling / can lead to ectopic limb formation | 0.015        | 0.018        | 0.0001       | 1.76         |
| <i>fgf17</i>        | maker-scaffold605-augustus-gene-3.9-mRNA-1          | Fgf signaling                                                                          | 0.043        | 0.039        | 0.076        | 0.74         |
| <i>fgf18</i>        | augustus_masked-scaffold266-abinit-gene-7.0-mRNA-1  | Fgf signaling                                                                          | 0.09         | 0.097        | 0.0001       | 2.01         |
| <i>fgf20</i>        | maker-scaffold31-augustus-gene-15.2-mRNA-1          | Fgf signaling                                                                          | 0.007        | 0.0001       | 0.029        | 2.66         |
| <b><i>fgfr1</i></b> | <b>maker-scaffold1100-augustus-gene-1.9-mRNA-1</b>  | <b>Fgf signaling / can lead to ectopic limb formation</b>                              | <b>0.029</b> | <b>0.047</b> | <b>0.004</b> | <b>17.21</b> |
| <i>gli2</i>         | augustus_masked-scaffold1176-abinit-gene-0.0-mRNA-1 | Limb positioning along anterior-posterior axis                                         | 0.079        | 0.078        | 0.083        | 0.09         |
| <i>gli3</i>         | maker-scaffold602-augustus-gene-40.4-mRNA-1         | Limb positioning along anterior-posterior axis                                         | 0.205        | 0.182        | 0.278        | 2.95         |
| <i>sall4</i>        | augustus_masked-scaffold388-abinit-gene-25.0-mRNA-1 | Patterning and morphogenesis of forelimb                                               | 0.124        | 0.123        | 0.123        | < 0.001      |
| <i>shh</i>          | maker-scaffold42-augustus-gene-36.2-mRNA-1          | Limb positioning along anterior-posterior axis                                         | 0.0001       | 0.0001       | 0.0001       | 0            |
| <i>tbx4</i>         | augustus_masked-scaffold1311-abinit-gene-9.0-mRNA-1 | Signals from intermediate mesoderm (hindlimb)                                          | 0.010        | 0.011        | 0.006        | 0.78         |
| <i>tbx5</i>         | maker-scaffold1382-augustus-gene-2.3-mRNA-1         | Signals from intermediate mesoderm (forelimb)                                          | 0.014        | 0.015        | 0.009        | 0.27         |

| External Gene ID    | <i>AptMant0</i> annotation ID                             | Involvement in limb development                                          | $\omega_0$   | $\omega_1$   | $\omega_2$   | LRT         |
|---------------------|-----------------------------------------------------------|--------------------------------------------------------------------------|--------------|--------------|--------------|-------------|
| <i>wnt1</i>         | augustus_masked-scaffold801-abinit-gene-0.3-mRNA-1        | Limb outgrowth and formation / axes formation                            | 0.014        | 0.016        | 0.014        | 0.09        |
| <b><i>wnt11</i></b> | <b>maker-scaffold661-augustus-gene-0.3-mRNA-1</b>         | <b>Limb outgrowth and formation / skeletal differentiation</b>           | <b>0.034</b> | <b>0.016</b> | <b>0.098</b> | <b>6.08</b> |
| <i>wnt2b</i>        | augustus_masked-scaffold185-abinit-gene-11.1-mRNA-1       | Signals from intermediate mesoderm (forelimb) / dorso-ventral patterning | 0.032        | 0.036        | 0.017        | 1.38        |
| <i>wnt4</i>         | maker-scaffold898-augustus-gene-1.3-mRNA-1                | Limb joint formation                                                     | 0.001        | 0.0001       | 0.005        | 2.25        |
| <i>wnt5b</i>        | maker-scaffold27-augustus-gene-468.2-mRNA-1               | Limb outgrowth and formation / Skeletal differentiation                  | 0.0001       | 0.0001       | 0.0001       | 0           |
| <i>wnt6</i>         | augustus_masked-scaffold95-abinit-gene-79.1-mRNA-1        | Negative regulator of limb chondrogenesis in chicken                     | 0.004        | 0.003        | 0.007        | 1.07        |
| <b><i>wnt8b</i></b> | <b>augustus_masked-scaffold842-abinit-gene-8.2-mRNA-1</b> | <b>Limb outgrowth and formation</b>                                      | <b>0.043</b> | <b>0.059</b> | <b>0.007</b> | <b>4.50</b> |
| <b><i>wnt9b</i></b> | <b>augustus_masked-scaffold721-abinit-gene-1.0-mRNA-1</b> | <b>Limb joint formation</b>                                              | <b>0.038</b> | <b>0.049</b> | <b>0.009</b> | <b>6.85</b> |

**Supplementary Table S13.** Ultra-conserved non-coding elements (UCNEs) with more than the expected 5% sequence change in *Apteryx mantelli*. UCNEs were downloaded from UCNEbase (<http://ccg.vital-it.ch/UCNEbase>) [12], orthology in each genome was established using BLAST [28], the orthologous sequence from each genome was aligned [29] to the chicken sequence annotated in the database and number of nucleotide changes were counted.

*A.m.* = *Apteryx mantelli*, *S.c.* = *Struthio camelus*, *T.gt.* = *Tinamus guttatus*, *T.a.* = *Tyto alba*, *A.cs.* = *Anrostomus carolinensis*, *F.a.* = *Ficedula albicollis*, *T.g.* = *Taeniopygia guttata*, *A.p.* = *Anas platyrhynchos*, *M.g.* = *Meleagris gallopavo*.

| UCNE ID            | <i>A.m.</i> | <i>S.c.</i> | <i>T.gt.</i> | <i>T.a.</i> | <i>A.cs.</i> | <i>F.a.</i> | <i>T.g.</i> | <i>A.p.</i> | <i>M.g.</i> | Length UCNE | %Change in <i>A.m.</i> | %Mean change in <i>S.c.</i> and <i>T.gt.</i> | %Mean change in other birds | Position in <i>Gallus gallus</i> genome | Position in <i>Apteryx mantelli</i> genome |
|--------------------|-------------|-------------|--------------|-------------|--------------|-------------|-------------|-------------|-------------|-------------|------------------------|----------------------------------------------|-----------------------------|-----------------------------------------|--------------------------------------------|
| BCL11A<br>Andrew   | 12          | 9           | 19           | 11          | 11           | 11          | 10          | 11          | 3           | 229         | 5.24                   | 6.11                                         | 4.15                        | chr3:769195-769423                      | scaffold570:596014-596242                  |
| HOXA<br>Larisa     | 19          | 14          | 21           | 6           | 8            | 7           | 7           | 2           | 1           | 357         | 5.32                   | 4.90                                         | 1.45                        | chr2:32403104-32403460                  | scaffold151:16384352-16384708              |
| MECOM<br>Joshua    | 29          | 7           | 10           | 6           | 5            | 8           | 9           | 9           | 1           | 395         | 7.34                   | 2.15                                         | 1.60                        | chr9:3922810-3923204                    | scaffold221:2205502-2205110                |
| NFIA Franz         | 20          | 15          | 25           | 6           | 8            | 7           | 7           | 3           | 2           | 218         | 9.17                   | 9.17                                         | 2.52                        | chr8:27842134-27842351                  | scaffold329:42894-43103                    |
| NKX6-1 Leo         | 17          | 17          | 24           | 8           | 4            | 5           | 5           | 5           | 1           | 266         | 6.39                   | 7.71                                         | 1.75                        | chr4:48216654-48216919                  | scaffold564:827247-827510                  |
| NR4A2<br>Aphrodite | 23          | 11          | 0            | 5           | 4            | 8           | 13          | 2           | 0           | 358         | 6.42                   | 1.54                                         | 1.49                        | chr7:37480363-37480720                  | scaffold22:1586820-1586462                 |
| PAX5 Elvira        | 15          | 8           | 8            | 2           | 2            | 8           | 8           | 2           | 3           | 219         | 6.85                   | 3.65                                         | 1.90                        | chrZ:325085-325303                      | scaffold1246:159-374                       |
| SOX2<br>Mustafa    | 17          | 1           | 13           | 0           | 0            | 0           | 0           | 0           | 0           | 236         | 7.20                   | 2.97                                         | 0.00                        | chr9:7512153-7512388                    | scaffold14:1546151-1545917                 |
| SP8 Scarlett       | 11          | 6           | 6            | 3           | 3            | 12          | 7           | 4           | 1           | 215         | 5.12                   | 2.79                                         | 2.33                        | chr2:30536926-30537140                  | scaffold151:13909784-13909998              |



|                    |                    |                    |                     |                    |                     |                    |                    |                    |                    |                        |                                   |                                                                     |                                                |                                                        |                                                           |
|--------------------|--------------------|--------------------|---------------------|--------------------|---------------------|--------------------|--------------------|--------------------|--------------------|------------------------|-----------------------------------|---------------------------------------------------------------------|------------------------------------------------|--------------------------------------------------------|-----------------------------------------------------------|
| TBX2<br>Santiago   | 14                 | 11                 | 14                  | 11                 | 15                  | 11                 | 12                 | 14                 | 5                  | 222                    | 6.31                              | 5.63                                                                | 5.11                                           | chr19:2493855-<br>2494076                              | scaffold1311:713904-<br>713686                            |
| <b>UCNE<br/>ID</b> | <b><i>A.m.</i></b> | <b><i>S.c.</i></b> | <b><i>T.gt.</i></b> | <b><i>T.a.</i></b> | <b><i>A.cs.</i></b> | <b><i>F.a.</i></b> | <b><i>T.g.</i></b> | <b><i>A.p.</i></b> | <b><i>M.g.</i></b> | <b>Length<br/>UCNE</b> | <b>%Change<br/>in <i>A.m.</i></b> | <b>%Mean<br/>change<br/>in <i>S.c.</i><br/>and<br/><i>T.gt.</i></b> | <b>%Mean<br/>change<br/>in other<br/>birds</b> | <b>Position in<br/><i>Gallus gallus</i><br/>genome</b> | <b>Position in<br/><i>Apteryx<br/>mantelli</i> genome</b> |
| TFAP2A<br>Julia    | 27                 | 8                  | 9                   | 7                  | 7                   | 11                 | 9                  | 11                 | 3                  | 402                    | 6.72                              | 2.11                                                                | 1.99                                           | chr2:90071047-<br>90071448                             | scaffold100:13570062-<br>13569662                         |
| TLE4<br>Robert     | 15                 | 11                 | 10                  | 9                  | 14                  | 8                  | 10                 | 5                  | 4                  | 242                    | 6.20                              | 4.34                                                                | 3.44                                           | chrZ:38726392-<br>38726633                             | scaffold3784:7926-<br>7685                                |
| TRPS1 Eros         | 14                 | 8                  | 7                   | 8                  | 4                   | 6                  | 7                  | 0                  | 0                  | 221                    | 6.33                              | 3.39                                                                | 1.89                                           | chr2:140299043<br>-140299263                           | scaffold7:7589779-<br>7589988                             |
| ZC3H3<br>Figaro    | 33                 | 4                  | 8                   | 4                  | 2                   | 5                  | 6                  | 1                  | 1                  | 217                    | 15.21                             | 2.76                                                                | 1.46                                           | chr2:154388655<br>-154388871                           | scaffold3568:110159-<br>110372                            |
| ZNF503<br>Amos     | 16                 | 21                 | 20                  | 12                 | 6                   | 10                 | 8                  | 7                  | 4                  | 302                    | 5.30                              | 6.79                                                                | 2.59                                           | chr6:21267923-<br>21268224                             | scaffold93:2528315-<br>2528614                            |
| chr1 Eden          | 23                 | 8                  | 4                   | 6                  | 6                   | 11                 | 10                 | 7                  | 3                  | 252                    | 9.13                              | 2.38                                                                | 2.84                                           | chr8:29352506-<br>29352757                             | scaffold1709:99854-<br>99616                              |
| chr4 Adam          | 17                 | 13                 | 12                  | 12                 | 13                  | 18                 | 17                 | 6                  | 5                  | 319                    | 5.33                              | 3.92                                                                | 3.71                                           | chr4:81608502-<br>81608820                             | scaffold92:10278731-<br>10279049                          |
| chr9<br>Cassandra  | 18                 | 15                 | 34                  | 14                 | 12                  | 14                 | 22                 | 7                  | 6                  | 268                    | 6.72                              | 9.14                                                                | 4.66                                           | chrZ:66204066-<br>66204333                             | scaffold1406:397946-<br>397679                            |
| chr9<br>Delphina   | 12                 | 8                  | 6                   | 8                  | 5                   | 2                  | 8                  | 8                  | 4                  | 206                    | 5.83                              | 3.40                                                                | 2.83                                           | chrUn_random:3<br>1824020-<br>31824225                 | scaffold958:84653-<br>84854                               |

**Supplementary Table S14.** Primers used to amplify the coding sequence of *fibin* in kiwi.

| <b>Primer name</b> | <b>Chicken coding sequence coordinates</b> | <b>Species sequence</b> | <b>Sequence (5' -&gt; 3')</b> |
|--------------------|--------------------------------------------|-------------------------|-------------------------------|
| fibin forward 1    | Fibin cDNA:71-89                           | Ostrich                 | TGCAGCCGGAGATGTCCAA           |
| fibin forward 2    | Fibin cDNA:95-113                          | Chicken                 | CCCTGCACCACTACTTCGT           |
| fibin reverse 1    | Fibin cDNA:275-294                         | Ostrich                 | CTAGCCGATGTCCTCCAGCA          |
| fibin reverse 2    | Fibin cDNA:291-311                         | Chicken                 | AGGTCGTAGGAGATGCTCTTG         |
| fibin reverse 3    | Fibin cDNA:372-391                         | Chicken                 | AGCGGTCCGAGCTGGAGTAG          |

**Supplementary Table S15.** Assembly metrics for available *Palaeognathae* genomes. *Tinamus guttatus* (release 2014-04-30) and *Struthio camelus* (release 2014-08-13) were downloaded from GigaDB [17].

|                               | <i>Tinamus guttatus</i> | <i>Struthio camelus</i> | <i>Apteryx mantelli</i> |
|-------------------------------|-------------------------|-------------------------|-------------------------|
| Number of scaffolds           | 175,907                 | 32,012                  | 326,827                 |
| Total size of scaffolds (bp)  | 1,059,687,971           | 1,257,873,544           | 1,595,278,775           |
| Longest scaffold (bp)         | 1,986,275               | 50,413,810              | 63,182,071              |
| Number of scaffolds > 1K nt   | 23,642                  | 1,890                   | 24,710                  |
| Number of scaffolds > 10K nt  | 7,466                   | 725                     | 6,641                   |
| Number of scaffolds > 100K nt | 2,883                   | 309                     | 1,040                   |
| Number of scaffolds > 1M nt   | 39                      | 110                     | 221                     |
| Number of scaffolds > 10M nt  | 0                       | 36                      | 32                      |
| N50 scaffold length (bp)      | 242,236                 | 17,714,005              | 3,956,354               |
| Scaffold %A                   | 28.65                   | 27.84                   | 25                      |
| Scaffold %C                   | 20.3                    | 19.41                   | 18                      |
| Scaffold %G                   | 20.28                   | 19.39                   | 18                      |
| Scaffold %T                   | 28.62                   | 27.8                    | 25                      |
| Scaffold %N                   | 2.16                    | 5.56                    | 13                      |
| Number of contigs             | 227,964                 | 94,215                  | 508,831                 |
| Total size of contigs         | 1,037,038,325           | 1,188,122,451           | 1,382,272,215           |
| Longest contig                | 317,681                 | 436,179                 | 166,809                 |
| Number of contigs > 1K nt     | 64,872                  | 52,847                  | 146,153                 |
| Number of contigs > 10K nt    | 25,927                  | 29,660                  | 40,984                  |
| Number of contigs > 100K nt   | 785                     | 1241                    | 69                      |
| Number of contigs > 1M nt     | 0                       | 0                       | 0                       |
| N50 contig length             | 35,048                  | 43,467                  | 16,480                  |

**Supplementary Table S16.** Scaffolds from the kiwi and ostrich assemblies, which span same two chromosomes in the chicken genome.

| Target genome | Galgal4 position             | Target genome position      | Alignment score | Galgal4 position            | Target genome position      | Alignment score |
|---------------|------------------------------|-----------------------------|-----------------|-----------------------------|-----------------------------|-----------------|
| ostrich       | chr2:124,565,139-124,565,947 | scaffold997:18,814-19,709   | 9,205           | chrZ:67,076,675-67,076,824  | scaffold997:16,127-16,276   | 4,910           |
| kiwi          | chr2:77,540,308-77,540,590   | scaffold13813:10,432-10,712 | 12,795          | chrZ:22,315,677-22,318,094  | scaffold13813:10-2,461      | 8,916           |
| kiwi          | chr2:43,004,513-43,004,744   | scaffold22667:1,050-1,277   | 8,531           | chrZ:16,808,869-16,810,200  | scaffold22667: 9,587-11,367 | 31,871          |
| kiwi          | chr2:70,348,445-70,348,692   | scaffold2391:205-411        | 3,940           | chrZ:63,580,918-63,581,663  | scaffold2391:10,711-11,890  | 22,186          |
| kiwi          | chr2:79,500,563-79,500,792   | scaffold44678: 2,679-2,886  | 9,124           | chrZ:56,913,078 -56,914,146 | scaffold44678:1,578-2,598   | 20,265          |
| ostrich       | chr3:104,577,316-104,577,823 | scaffold939:23,377-23,931   | 17,397          | chr5:449,083-449,295        | scaffold939:506-721         | 7,077           |
| kiwi          | chr3:4,114,510-4,114,768     | scaffold4691:26,756-27,006  | 5,702           | chr5:492,662-492,914        | scaffold4691:12,460-12,734  | 9,185           |

**Supplementary Table S17.** Mitochondrial genomes used in the phylogenetic analysis  
(Error! Reference source not found.).

| <b>GeneBank accession ID</b> | <b>Species scientific name</b>  | <b>Species common name</b> |
|------------------------------|---------------------------------|----------------------------|
| 13116556                     | <i>Dinornis giganteus</i>       | North Island Giant Moa     |
| 13116573                     | <i>Emeus crassus</i>            | Eastern Moa                |
| 14141877                     | <i>Dromaius novaehollandiae</i> | Emu                        |
| 14141905                     | <i>Struthio camelus</i>         | Ostrich                    |
| 14141919                     | <i>Anomalopteryx didiformis</i> | Bush Moa                   |
| 30387848                     | <i>Pterocnemia pennata</i>      | Darwin's Rhea              |
| 46255316                     | <i>Apteryx haastii</i>          | Great Spotted Kiwi         |
| 46326805                     | <i>Tinamus major</i>            | Great Tinamou              |
| 46358645                     | <i>Eudromia elegans</i>         | Tinamou                    |
| 48864618                     | <i>Casuarius casuarius</i>      | Southern Cassowary         |
| 49616788                     | <i>Smaug warreni</i>            | Warren's Girdled Lizard    |
| 89274114                     | <i>Taeniopygia guttata</i>      | Zebra Finch                |
| 189342971                    | <i>Anas platyrhynchos</i>       | Duck                       |
| 323690831                    | <i>Meleagris gallopavo</i>      | Turkey                     |
| 515021884                    | <i>Ficedula albicollis</i>      | Flycatcher                 |
| 584458524                    | <i>Gallus gallus</i>            | Chicken                    |
| 641804046                    | <i>Mullerornis agilis</i>       | Elephant Bird              |

## Supplementary Note

### Sampling, DNA library preparation and sequencing

Since birds have female heterogamety, we sampled female kiwi to assure that the W chromosome is included in the assembly. The sequenced individuals originate from the far North (kiwi code 73) and central part – Lake Waikaremoana (kiwi code AT5 and kiwi code 16-12) of North Island (Supplementary Fig. S10). They were sampled in 1986 (kiwi code 73) and 1997 (kiwi code AT5 and 16-12) in 'operation nest egg' carried out by Rainbow and Fairy Springs, Rotorua. The genome was assembled with iwi approval.

Genomic DNA was extracted from *Apteryx mantelli* embryos using standard procedures. To assemble the kiwi genome, we generated both small-insert-size and long-insert-size libraries using the genomic DNA from two of the individuals. The DNA from the first individual (code 73) yielded small-insert-size libraries (240, 420, and 800 bp) and long-insert-size mate-paired-end libraries (2, 3, and 4 kb). The second individual (code 16-12) was used for building solely longer-insert mate-paired-end libraries (7, 9, 11, and 13 kb). In addition, we generated a small-insert-size library for a third individual (code AT5) that is used in genomic analyses regarding population diversity and validation of mutations, but it was not included in the assembly (Supplementary Table S1; Supplementary Fig. S10).

DNA small-insert-size libraries were constructed using the standard TruSeq Illumina kit, following the protocol provided by the manufacturer. Briefly, a total of 7 µg genomic DNA were sheared by sonication with Bioruptor® Standard using each time 1 µg DNA in 100 µl total volume and adjusting the number of cycles according to the desired fragment size. The fragment ends were enzymatically polished using a polymerase with 3' -> 5' activity to obtain blunt ends and ligate the Illumina adaptors to the products. Fragments were purified with AMPure SPRI bead (Agencourt, Beverly, MA) to yield the desired size. Additionally, a 2% agarose gel extraction was performed after the final

amplification step, requiring the insert size of a library to fall in a narrow range, with a variation of less than 10% of the size of the peak, to further simplify the assembly process. The insert sizes of all libraries were assessed using DNA 1000 chips on the 2100 Bioanalyzer (Agilent Technologies, Santa Clara, CA).

Long-insert mate-paired-end libraries (2, 3, and 4 kb) were prepared using the mate pair library Illumina kit. Briefly, 15-20  $\mu$ g of DNA was fragmented by sonication, and biotin-labeled dNTPs were used for polishing the ends. A 1.5% low molecular weight agarose gel was run and bands at 2 kb, 3 kb, and 4 kb were selected allowing for 10% variation in size. Selected DNA fragments were circularized overnight. The remaining linear fragments were digested using Exonuclease I so that the circularized DNA could be sheared by sonication on Bioruptor® Standard. The merged ends were captured on streptavidin magnetic beads Dynabeads M-270 (Invitrogen), given the biotin-streptavidin interaction. The protocol was continued following the same steps as previously described for the short-insert-size libraries.

Longer-insert mate-paired-end libraries (7, 9, 11, and 13 kb) were generated with the Nextera Mate Pair Sample Preparation kit from Illumina using DNA extracted from a different female individual (code 16-12). The protocol required an input of 4  $\mu$ g DNA that was fragmented with a Tagment enzyme, which attached a biotinylated junction adapter to both ends of the tagmented molecule. A 0.6% megabase agarose gel was run and bands at 7 kb, 9 kb, 11 kb, and 13 kb were excised allowing for 10% variation in size. Size selection was further confirmed by running a DNA 12000 chip on the 2100 Bioanalyzer (Agilent Technologies, Santa Clara, CA). Circularization was run overnight and the following steps were followed as described above. The average range of the final libraries was 600 bp, which prevented forward and reverse reads (with a sequence length of 96 bp each) from overlapping in sequence.

Sequencing was performed on the Illumina HiScanSQ System (Core Unit Sequencing, University of Leipzig) for short-insert-size and the long-insert mate-paired libraries.

Clusters were generated after quantification of the libraries using the Library Quantification Kit – Illumina/Universal (KAPABiosystems) according to the instructions of the manufacturer. Library DNA at a concentration of 10 pM was clustered using an Illumina cBot according to the PE\_Amp\_Lin\_Block\_Hybv8.0 protocol of the manufacturer. Paired-end sequencing with reads of 101 bp was performed with an Illumina HiScanSQ sequencer using version 3 chemistry and the version 3 flowcell according to the manufacturer’s instructions. Median cluster density was usually about 600,000 clusters per mm<sup>2</sup> or 80–100 million raw clusters per lane.

Longer-insert mate-paired-end libraries were sequenced on the Illumina HiSeq Platform at the Max Planck Institute for Evolutionary Anthropology Leipzig. Briefly, the libraries were quantified using Qubit® 2.0 Fluorometer (Invitrogen) with a High Sensitivity Kit and 6 pM of the pooled libraries were used for cluster generation. Clusters were formed using Illumina cBot following PE\_Amp\_Lin\_Block\_TubeStripHyb, v8 instructions of the manufacturer. Paired-end 96 bp-sequencing reads were generated on an Illumina HiSeq 2500 platform using TruSeq SBS kit v3 – HS. Quality parameters and cluster density (800,000–1,000,000 clusters/mm<sup>2</sup>) were checked via the Illumina Sequencing Analysis Viewer.

### **Filtering and read correction**

Sequences were adapter-trimmed and filtered for adapter dimers and chimeras using scripts included in leeHom [30]. Reads with more than 5 bases with quality scores below 15 (PHRED-scale) were discarded. If the forward and reverse reads overlapped for more than 11 bp, the two reads were merged. For the overlapping part, a consensus sequence was determined by calling the base with the highest quality score. Additionally, resulting merged reads that were shorter than 60 bp were discarded.

Sequencing errors pose a challenge for the *de Bruijn* graph short-read assembly algorithm. However, methods exist that can correct some sequencing errors based on



the frequency of *k-mers* in reads. After concatenating the data from all short insert libraries, the frequencies of all 19-mers in the dataset were counted using Jellyfish [31]. This distribution (Supplementary Fig. S1) was provided to Quake [1] which uses the information to correct reads from each of the short-insert-size libraries separately (Supplementary Table S1). In sum, 36.5% of the total short-insert-size library sequences were removed which left 52.53 Gb of usable high-quality sequences. The corrected reads were used for *de novo* assembly.

### **Genome assembly**

We assembled the kiwi genome with SOAPdenovo [32] v2.04 using a *k-mer* size of  $K = 23$  and default parameters. Only the corrected short-insert-size libraries were used for contig building. As recommended by SOAPdenovo [32], long-insert-size libraries were not included in the initial contig generation as these may introduce more misassembly due to the library construction approach in which circularization can lead to chimeras of a small fraction of reads that come from two different molecules that were misjoined during circularization.

In the contiging step 40 billion *k-mers* were processed and 1.33 billion linear nodes were constructed. During the graph simplification step 14.36 million tips were removed because they contained *k-mers* that were not well connected. An unambiguous graph path was constructed from the retained *k-mers* and contigs were reported, considering a size of 100 bp as the shortest length. Contigs summed up to 1.227 Gb, with average lengths of 731 bp, N50 of 1,550 bp, and N90 of 281 bp.

Scaffolds were built by joining contigs using paired-end reads from libraries of all sizes, including small-inserts. The scaffolds were constructed starting with small-insert-size libraries, and continuing with long-distance mate-paired-end libraries, ending with the 13-kb library. At least 3 consistent read pairs from short-insert-size libraries or 5 read pairs for the mate-pair-end libraries were required to support the joining of two contigs.

An overview of the assembly statistics at different stages is given in Supplementary Table S2. Using only 240, 420, and 800 bp data for scaffolding resulted in N50 of 31,909 bp and an N90 of 2,394 bp. The addition of the 2-kb insert-size library resulted in N50 and N90 of 32,914 bp and 2,581 bp, respectively. Adding the 3-kb library data improved the N50 and N90 to 66,802 bp and 4,737 bp, respectively. Finally, adding the 4 to 13-kb libraries led to an N50 of 5,026,352 bp and N90 of 35,043 bp. This assembly spans 1.816 Gb with 33.15% unknown (missing) bases.

To close the gaps in the scaffolds we used GapCloser from the SOAP package [32]. Briefly, the paired-end information from the corrected short-insert-size libraries was used as long as one read mapped to the scaffolds, while its pair was located in a gap region. These reads were locally assembled by constructing a *de Bruijn* graph similar to the contigging process. This resulted in an assembly with 13.37% unresolved bases. The contig N50 improved from 1,550 bp to 16.48 kb and also the average length of breaks in scaffolds dropped from 1,841 to 1,170 bp after filling the gaps. The length of the assembly decreased slightly to 1.595 Gb with an N50 of 3.96 Mb and 221 scaffolds longer than 1 Mb that sum up to 69% of the total assembly (Supplementary Table S3). Subsequent analyses were done on the gap-closed assembly (*AptMant0*).

### **Whole genome alignments**

To facilitate comparative analyses with other birds, the scaffolds from the kiwi genome assembly (*AptMant0*) were aligned to the chicken genome (*Gallus gallus Galgal4*) and zebra finch (*Taeniopygia guttata taeGut3.2.4*) [18] using Lastz [33] with default parameters. The UCSC Genome Browser whole genome alignment pipeline [34] was used to process the alignments. Thus, *axtChain* (with parameters: `minScore = 1000`, `linearGap = loose`, `chainAntiRepeat`, `chainMergeSort`, `chainPreNet`, `chainNet`) and *netSyntenic* were used. Scaffolds were chained and netted to the chicken chromosomes and liftover files were further generated using *netChainSubset* and *ChainStitchId*. Files

were converted between maf and axt formats using *MafToAxt*, *netSplit*, *netToAxt*, *axtSort* and *axtToMaf*. All programs were compiled from jksrc v 130 downloaded 2009.07.07. A total of 799,092,865 bp were chained to the chicken chromosomes, of which 193,978,601 bp (24.27%) differed from the chicken reference (Supplementary Table S5). The percentage difference to the zebra finch chromosomes was 24.64%.

To detect whether any chromosomal rearrangements happened in the ratites, we also aligned the ostrich genome on a per chromosome basis to the chicken genome (*Gallus gallus Galgal4*) using Lastz [33] with default parameters. Given the high fragmentation of the tinamou assembly (Supplementary Table S15), this genome could not be used in this analysis. The best alignment to each locus for each chromosome was retained for both kiwi and ostrich using *axtBest* from the UCSC Genome Browser [34]. A minimal alignment score of 1,000 was applied to reduce false positives. A list of scaffolds where one segment maps to one chromosome and the other maps to a different one, regardless of strand orientation, was produced. Since true rearrangements are hard to distinguish from misassemblies, we focused on scaffolds that spanned the same two different chicken chromosomes in both kiwi and ostrich.

A previous study has reported a rearrangement between the reptiles (Red-tailed Boa and Green Anole Lizard) chromosome 2 and ostrich pseudo chromosome Z [35]. Although a rearrangement in kiwi and ostrich is suggested between chromosomes 2 and Z from chicken, the coordinates of the hits do not overlap for the ostrich and kiwi genomes (Supplementary Table S16). To confidently perform such an analysis, further improvement of both assemblies is necessary.

### **Genome coverage and estimation of genome size**

Sequencing errors can interfere with the coverage estimation from the *k-mer* distribution. To estimate the genome sequencing depth more accurately, all corrected short-insert-size libraries were realigned to the assembled genome (*AptMant0*). All

reads that mapped to scaffolds were considered. An average coverage of 31.74-fold was obtained. The distribution of the coverage density was plotted for a randomly chosen subset of 1% of the sites pertaining to the 1,000 longest scaffolds for a total of 101.7 Mb sites. The average coverage computed on that subset was 35.85-fold (Supplementary Fig. S14). GC content was computed across the 1,000 longest scaffolds and coverage was plotted against the GC content. A mean of 41% GC bases was calculated. The genome-wide coverage is observed in regions with GC content between 25% and 62% (Supplementary Fig. S13). Coverage is lower outside of this range of GC content.

Information about the genome size of kiwi is unavailable. To check how much of the genome is covered by the *AptMant0*, we estimated the genome size starting from the *k*-mer distribution (Supplementary Fig. S1). *K*-mer counts show a mixture of two distributions: the coverage of true *k*-mers and the coverage of erroneous *k*-mers. Erroneous *k*-mers are considered the ones that have low coverage, but high frequency and follow a Poisson distribution, while true *k*-mers have high coverage and follow a Gaussian distribution. The cutoff that separates true and erroneous *k*-mers was estimated at a coverage of 5-fold, after which the *k*-mers frequency distribution followed a bell-shaped curve. The peak of the true *k*-mer-distribution is at 31-fold. *K*-mers cannot span over the edge of reads, hence their abundance is underestimated. To circumvent this, the real sequencing depth (*D*) was calculated starting from the observed coverage ( $C_k = 31$ ) of a *k*-mer (of size  $K = 19$  nt) in reads of length *L* ( $L = 101$  nt);  $D = C_k * L / (L - K + 1)$  [1] and is 37-fold for the true *k*-mers distribution. The percentage of *k*-mers that have a coverage higher than 5, and are considered truly part of the genome is 68.53%. This is an underestimate, as part of the *k*-mers with lower coverage may still be true *k*-mers, originating for example from regions of the genome that are difficult to sequence. To estimate how many low coverage-*k*-mers are still true, we used a linear interpolation and calculated the area under the curve between the origin of the axes and the corresponding *k*-mer frequency at the cutoff of 5-fold coverage. This finally resulted

in 71% of *k-mers* predicted as true, most likely slightly overestimated. With this information and the total number of nucleotides that were used to calculate the distribution (85.42 Gb, Supplementary Table S1), the number of reads that make up the true *k-mer* distribution lies between 58.54 Gb (likely an underestimate due to the hard cutoff) and 60.69 Gb (which approximates the error-free *k-mer* distribution). To estimate the genome size we divided the number of nucleotides by the real sequencing depth ( $D = 37$ -fold) and obtained a range of 1.58–1.64 Gb.

The computed average coverage from corrected reads realigned to *AptMant0* (31.74-fold) and the total number of corrected reads (52.53 Gb, Supplementary Table S1) gave a similar genome size estimate of 1.65 Gb. Thus the kiwi falls at the higher end of the bird genome sizes distribution (Supplementary Table S4, <http://www.genomesize.com>) and *AptMant0* (1.595 Gb, Supplementary Table S3) covers about 96% of the expected genome length.

The AT5 individual was aligned to the genome reference using the same program and identical parameters. For this set of sequences, an average coverage of 21.5-fold was computed.

We further inquired whether the larger genome size is typical for kiwi, or rather a characteristic of the ratites. To this end we searched the Animal Genome Size Database (Supplementary Table S4), which approximates the genome size according to the species-specific C-value. According to this estimation, present ratites – ostrich and emu – are situated above the average for 896 birds. However, tinamou lies very close to the bird average. Since the ostrich and tinamou assemblies are available on GigaDB [17] we ran similar statistics as for the kiwi assembly (Supplementary Table S15). According to the assemblies ostrich and tinamou are situated in the avian range with genomes of 1.26 and 1.06 Gb lengths, respectively. However, no statistics are available for a *de novo* prediction of these birds' genome sizes. According to the Animal Genome Size Database,

ostrich has a diploid set of 80 chromosomes, with one additional chromosome as compared to the domestic chicken – 78 chromosomes.

Even by accounting the Ns in the kiwi assembly (13% Supplementary Table S3), the total size of the assembly would sum up to 1.38 Gb, still higher than the bird average. To roughly estimate whether the larger genome size in kiwi corresponds to coding or non-coding regions, we analyzed the scaffolds, which did not align to the chicken chromosomes. These represented 218,454 scaffolds with a total length of 167,802,248 bp. Of the 18,033 genes annotated in kiwi (Supplementary Note: *De novo* gene prediction and gene annotation), 22 genes (98,041 bp) were annotated on these scaffolds. Considering a uniform distribution of genes across the genome and scaffolds, the expected number of genes over 0.17 Gb is 1,916.

However, because gene annotation can be influenced by scaffold length, in a further analysis, we focused only on scaffolds with a length lower or equal to the maximal length of the scaffolds which were not aligned to the chicken genome (52,029 bp). We computed the average number of annotated genes according to length of scaffold in windows of 500 bp (i.e. average number of genes in for e.g. scaffolds with length of 10,000–10,500 bp). The same analysis was done on the scaffolds, which did not align and a Wilcoxon ranking test was used for statistical significance. P-value was highly significant ( $< 0.0001$ ) for a lower number of annotated genes on the scaffolds that did not align to chicken genome. This suggests that the genome expansion is a characteristic of kiwi, rather than of the ratite clade, and in kiwi is likely a result of non-coding sequence expansion.

### **Measure for heterozygosity**

Raw reads from each individual (kiwi code 73 and kiwi code AT5) were separately aligned to *AptMant0* using BWA (Version: 0.5.10) [36]. Each resulting data set was genotype called by Samtools mpileup version 0.1.18 [37] with “Base Alignment Quality”

computation turned off and otherwise default options. The likelihood function is obtained as the marginal likelihood of the data conditioned on heterozygosity, assuming independence of sites:

$$L(h) = \prod_i \sum_{x,y \in \{A,C,G,T\}} P(D_i|G_i = xy)P(G_i = xy|h)$$

$$= \prod_i h \sum_{x \neq y} P(D_i|G_i = xy) + (1 - h) \sum_{x=y} P(D_i|G_i = xy)$$

where  $i$  ranges over all sites of the genome for which Samtools produced valid output,  $G_i$  is the (unknown) genotype at site  $i$ ,  $D_i$  is the observed data at site  $i$ , and  $h$  is the fraction of heterozygous sites. The logarithms of the  $P(D_i|G_i)$  values are, up to a factor not dependent on  $h$ , available from Samtools output in the PL field. We now define:

$$P_i = \frac{\sum_{x \neq y} P(D_i|G_i = xy)}{\sum_{x=y} P(D_i|G_i = xy)}$$

$$\pi = \log \frac{h}{1 - h}$$

$$h = \frac{e^\pi}{1 + e^\pi}$$

which replaces  $h$  with its log-odds-ratio, which is better behaved in the numerical optimization. By multiplying the previous term for the likelihood by  $\frac{\sum_{x=y} P(D_i|G_i=xy)}{\sum_{x=y} P(D_i|G_i=xy)} = 1$  we obtain the expression that follows:

$$L(\pi) = \prod_i \sum_{x=y} P(D_i | G_i = xy) \prod_i \left( \frac{e^\pi}{1 + e^\pi} P_i + \frac{1}{1 + e^\pi} \right)$$

The first product does not depend on  $\pi$ , and can be dropped without changing the maximum of the likelihood function. We now take the logarithm, and arrive at the final log-likelihood function, which is maximized numerically using Newton iteration. An approximate 95% confidence interval is calculated from the second derivative:

$$\tilde{L}(\pi) := \sum_i \log \frac{1 + P_i e^\pi}{1 + e^\pi}$$

$$\hat{\pi} := \arg \max_{\pi} \tilde{L}(\pi)$$

$$\pi_{\pm} := \hat{\pi} \pm \frac{1}{\sqrt{\tilde{L}''(\hat{\pi})}}$$

For the first individual (code 73), we obtain a heterozygosity of 0.15% (CI from 0.1496% to 0.1501%), while for the second individual (code AT5), it is 0.21% (CI from 0.2120% to 0.2126%).

For the individual used to assemble the reference (code 73), the existence of sites, which are homozygous for an alternative allele, can be used as a rough measure of assembly error. The number of such sites was very low ( $5.17 \times 10^{-06}$ ).

### **Mitochondrial genome assembly**

The similarity of genuine mitochondrial sequences and nuclear copies of mitochondrial (NUMT) DNA can cause bubbles in the *de Bruijn* graph, which results in conflicts for the assembly software. Consequently, we find several smaller contigs in our final assembly that align to the partial *Apteryx mantelli* mitochondrial genome reference (GeneBank AY016010.1) and cover parts of the sequence. Since only a partial *Apteryx mantelli* mitochondrial genome is available to date, to improve the mitochondrial assembly, the



mitochondrial genome was additionally assembled starting from the corrected reads of the short-insert-size paired-end libraries and using ‘AMOScmp-shortReads-new’ – a comparative assembler [38] being part of the Amos package (v.3.1.0). In contrast to *de novo* assembly, in this approach the assembly process is guided by a related mitochondrial genome.

### Read filtering

The partial *Apteryx mantelli* mitochondrial genome reference (GeneBank AY016010.1), the complete *Apteryx haasti* (GenBank NC\_002782.2) and the *Apteryx owenii* (GenBank NC\_013806.1) mitochondrial genomes were used as proxy references to filter reads. To account for the differences between the sample kiwi code 73 and the references, as well as for sequencing errors, the filter must be relatively permissive. This was achieved by applying a spaced-seed filtering scheme:

Let  $R_1, \dots, R_N$  be the references. Let further be  $sp=[01]^l$  be a spaced seed pattern of length  $l$  and let the weight  $k$  be defined as the number of ‘1’s in the seed. Applying  $sp$  to a specific position  $p$  at  $R_i$  generates a seed  $t_{R_i,p}$  of length  $k$  by aligning  $sp$  to  $R_i$  at  $p$  and concatenating the bases of  $r_i$  which show a ‘1’ in  $sp$ . Note that  $sp$  cannot be applied to a specific position, if at least one ‘1’ matches a ‘N’ or non ‘ACGT’ symbol. Applying  $sp$  to all possible positions (taking into account circularity of MT) of  $R_1, \dots, R_N$  as well as to its reverse complements generates the seed data base SDB<sup>1</sup>.

Let  $r$  be a read. The pattern  $sp$  matches  $r$  at a position  $p$ , if the corresponding seed  $t_{r,p}$  generated by applying  $sp$  at  $p$  is present in the seed data base SDB. The filter accepts  $r$  if  $sp$  matches  $r$  in at least 10% of the positions the pattern can be applied to or if the same holds for the reverse complement of  $r$ . Paired-end reads  $r1$  and  $r2$  are both accepted if at least  $r1$  or  $r2$  is accepted.

---

<sup>1</sup> example: seed pattern  $sp = 11011$ .  $sp$  has length  $l = 5$  and weight  $k = 4$ . Let reference  $R = "ACGTACGT"$ . Applying  $sp$  to  $R$  at position  $p = 3$  generates the seed  $t_{R,p} = GTCG$

The spaced seed read filter was trained using the spaced seed pattern '1111011101111' (weight 11, length 13) on the mentioned references. After filtering

- 13.6 million (3.21%) reads from the 240-bp library
- 3.46 million (1.07%) reads from the 420-bp library
- 3.88 million (5.39%) reads from the 800-bp library

were retrieved and further used in the assembly.

#### **First iteration:**

Filtered reads of the 240-bp, 420-bp, and 800-bp corrected paired-end libraries were used. 'AMOScmp-shortReads-new' (<http://sourceforge.net/projects/amos/files/>) was run with default parameters using *Apteryx haasti* (GenBank NC\_002782.2) mitochondrial genome as the reference. The output consisted of 6 scaffolds (14,872 bp, 1,302 bp, 344 bp, 323 bp, 266 bp, and 101 bp) with a total length of 17,208 bp, slightly bigger than the reference (16,980 bp).

#### **Second iteration:**

To further improve the assembly, the process was repeated. Reads were filtered by using the assembly retrieved by iteration one and a stricter seed pattern '1110111110111' of length 15 and weight 13 was applied. After filtering:

- 2.55 million (0.60%) reads from the 240-bp library
- 1.27 million (0.39%) reads from the 420-bp library
- 0.66 million (0.92%) reads from the 800-bp library

were used as input for the second iteration. This assembly consisted of 10 scaffolds with a total length of 18,377 bp and biggest scaffold of 14,896 bp. A second iteration did not further improve the assembly, hence the biggest scaffolds from this step were used for further designing primers to complete the mitochondrial genome.

### **PCR amplification of the missing fragment**

To obtain the complete mitochondrial genome of *Apteryx mantelli* a forward primer was designed on the biggest scaffold from second iteration, with the sequence:

- CCAAAGACTGAAGAATACACCCC

and the reverse primer on the second biggest scaffold from second iteration, with the sequence:

- GGGAGCTGGAGGTAAAGTT

A fragment of approximately 120 bp was amplified and sequenced using Sanger technology. The sequence filling the gap between the contigs was highly repetitive and high in GC content, suggesting that the original assembly failed due to low coverage and a complicated graph-structure representing the region.

### **RNA sequencing**

RNA was extracted from tissue collected from the same female embryo (code 16-12) that was used for generating the longer-insert mate-paired-end libraries using standard procedures. Extraction yielded a high concentration of 111 ng/ $\mu$ L and good quality RNA (RNA integrity number = 5.5), which could be used for library preparation. Libraries with 250 bp-insert size were prepared from poly-A RNA using the Illumina TruSeq RNA Sample Preparation Kit v2. Sequencing was performed on the Illumina HiSeq Platform as described above and 47.5 Gb were generated.

### ***De novo* gene prediction and gene annotation**

The MAKER pipeline [39] was used for gene annotation, based on several sources of evidence: *de novo* gene prediction, RNA-Seq data, and protein evidence from three species (*G. gallus*, *T. guttata*, *M. gallopavo*) downloaded from BioMart (Ensembl version 72 [18]).

RepeatMasker version 4.0.1 (<http://www.repeatmasker.org>) was used to identify repeats that matched to entries in standard databases for known repetitive sequences (i.e. Repbase 18.08 [40]), using data available for all the model organisms. Following repeat masking, preliminary gene models were produced using Augustus version 2.7 [41] with the training dataset for chicken, resulting in 27,876 *de novo* predicted genes. To increase the likelihood that a sequence region is associated with a gene, further evidence was sought from either homology to known proteins or the active transcription of that region. Briefly, kiwi RNA-Seq data was aligned to *AptMant0* using NCBI BLASTN version 2.2.27+ [5]. Given the fact that EST data usually contain just parts of transcribed RNA with only a few full length transcripts, BLASTX was used to align protein data against the raw genomic sequence in the attempt to identify regions of homology.

Using both the *ab initio* and evidence informed gene prediction, Maker updated features such as 5' and 3' UTRs based on RNA-Seq evidence and created a consensus gene set. 18,033 RNA-seq-supported kiwi genes were annotated according to this pipeline.

### **Orthologs and Ka/Ks calculation**

Starting from chicken annotations, orthologs between chicken, zebra finch, and turkey were downloaded from Ensembl 73 [16]. Kiwi genes for which the Maker annotation ortholog assignment was in accordance to the triplet downloaded from Ensembl were considered in the further analysis. This resulted in 7,294 orthologs out of which 6,486 were single-copy.

For ostrich, tinamou, chuck-will's-widow, and barn owl orthologs were established by aligning coding sequences against the database consisting of chicken coding sequences from Ensembl 73 using tblastx [28]. Orthologs transitivity is a major challenge in accurately assigning ortholog groups among multiple species. We thus filtered only the

reciprocal best hits to the chicken gene with an e-value  $\leq 10^{-10}$  [42] and assigned it to the kiwi, chicken, zebra finch, and turkey ortholog group.

Coding sequences for the eight avian species were aligned using Muscle v3.8.31 [29].

Two different sets of alignments were compiled for further analysis:

1. The first set consists of alignments of all eight species that do not contain a single frameshift indel, yielding a set of 2,660 genes.
2. The second set consists of the longest uninterrupted run of at least 200 aligned bases in each multiple sequence alignment, for which we first assured that gaps in the alignment were not introduced by unresolved bases in our assembly. Adding these genes to the first set yielded a set of 4,152 genes.

The CODEML program from the package PAML [43] was run using first 3,754 orthologs assigned between kiwi, chicken, zebra finch and turkey, since the last three avian genomes are high quality, intensively-curated genomes and represent a quality control for the kiwi sequences. Six avian pairwise combinations were run to obtain estimates of non-synonymous (Ka) and synonymous (Ks) changes in the four avian lineages (*G. gallus*, *T. guttata*, *M. gallopavo*, *A. mantelli*). Ka and Ks distributions were compared pairwise between all four avian species (Supplementary Fig. S11). We found that the Ka values are much lower than Ks, confirming that non-synonymous mutations occur with a lower frequency, as a result of purifying selection acting to remove deleterious mutations. On the other hand, Ks values in kiwi were similar to the ones in the other bird lineages, most closely to the zebra finch distribution.

To examine selective constraints on the kiwi branch we scanned for differently evolving genes with the CODEML program under a branch model [9] using the 4,152 orthologs in the eight bird species. Unrooted trees used for phylogenetic analyses in CODEML were built on PHYLIP (<http://evolution.genetics.washington.edu/phylip.html>). Likelihood ratio tests (LRTs) were performed to compare a series of evolutionary models. First, an average  $\omega$  was estimated across the tree using model = 0. The one-ratio model

(model = 0, NSsites = 0) was used to estimate the same  $\omega$  ratio for all branches in the phylogeny. In a second step, we used the two-ratio model (model = 2, NSsites = 0), with a background  $\omega$  ratio and a different  $\omega$  on the kiwi branch. The same test was performed sequentially for each of the two nocturnal birds, ostrich, and tinamou as the foreground branch. These two models were compared via a likelihood ratio test (1 degree of freedom) [44]. In the last step the kiwi branch was fixed to  $\omega = 1$  and all other branches were considered different (model = 2, fix\_omega = 1, omega = 1). The parameters used were default: CodonFreq = 2, kappa = 2, initial omega = 0.4. A chi-square test was used to test whether the kiwi branch is significantly different and the estimated  $\omega$  for kiwi is higher than for other species, which would imply that these genes might be evolving faster on the kiwi branch. An identical test was performed then for chuck-will's-widow, barn owl, ostrich, and tinamou.

A similar test with kiwi as foreground branch was performed on the reduced dataset including only kiwi and the three Ensembl bird genomes. LRTs ( $p < 0.05$ ) between the model in which kiwi represented the foreground branch (model = 2) and the null model (model = 0), in which all branches were considered equal (kiwi, chicken, zebra finch, turkey), predicted that 12.18% of the genes in this dataset show evidence for possible positive selection. This result is similar to previously reported values for chicken 10.17% and zebra finch 11.3% [45]. Misalignments and poor sequence quality can result in an inflated estimate of branch test positive selection [45, 46]. The comparison across species showed that the proportion of positively selected genes in kiwi is only slightly increased compared to high quality genomes, such as chicken and zebra finch.

### **Gene Ontology and rapidly evolving genes**

Branch-specific  $\omega$  values were used to identify GO categories that are evolving significantly different in each of the previously mentioned nocturnal birds and ratites, including kiwi. The  $\omega$  values were estimated as described above, using all 8 avian

species. To explore the evolutionary functions that may have experienced faster evolution on each branch the GO annotation was downloaded from Ensembl 73 [16] and enrichment was tested using the FUNC package [19].

A hypergeometric test was run for each of the five bird species: kiwi, ostrich, tinamou, barn owl, and chuck-will's-widow by including in the set of interest genes with a significantly higher  $\omega$  than the background. The same was done for genes evolving significantly slower. None of the species presented significantly enriched categories after family-wise error rate multiple testing correction. As an indicator for biological relevant processes, categories were considered for further analysis if there were 3 or more significantly changed genes in the node, and the number of significant genes was higher or equal to 5% of the total genes annotated in the node. By excluding the categories that appeared enriched in any of the other species we could identify the kiwi-specific GO categories and the ones shared with any other species. Supplementary Table S8 shows overrepresented categories enriched in genes faster evolving. We performed the same analysis for genes evolving slower in each of the considered bird species (Supplementary Table S8; Supplementary Table S9). Genes that clustered in biological meaningful GO categories, which could potentially underlie kiwi-specific physiology were extracted from the respective node to allow for manual inspection (Supplementary Table S8C; Supplementary Table S9C).

### **Gene families assignment using TreeFam**

TreeFam defines a gene family as a group of similar genes, which descended from a single gene in the last common ancestor of the analyzed species [18]. The gene families were built across sixteen genomes: *Gallus gallus*, *Anas platyrhynchos*, *Ficedula albicollis*, *Meleagris gallopavo*, *Taeniopygia guttata*, *Pelodiscus sinensis*, *Anolis carolinensis*, *Homo sapiens*, *Mus musculus*, *Gasterosteus aculeatus*, *Ornithorhynchus anatinus*, *Tinamus guttatus*, *Struthio camelus*, *Anrostomus carolinensis*, *Tyto alba*, and *Apteryx mantelli*.

Except for *Apteryx mantelli* protein sequences were downloaded from Ensembl 73 [16] or GigaDB [17] (last four genomes – *Palaeognathae* and nocturnal birds) and the longest protein sequence was chosen for further analysis. Protein sequences from each species were searched against the TreeFam 9 HMM library.

TreeFam generates gene orthology and paralogy predictions using maximum likelihood phylogenetic gene trees. The HMM libraries are built using orthologs from 109 species. The gene trees reconciled with their species tree have their internal nodes annotated to distinguish duplication or speciation events [47]. Genes related to a speciation event are defined as orthologs, whereas those which arose through duplication events are considered paralogs.

HMMER [48] employed by TreeFam's software was used to assign homologs for the 12 considered species to existing TreeFam families.

In total, genes were assigned to 10,096 families, of which 623 contained one gene of each species. The single-copy orthologous families were used to build a phylogenetic tree for the sixteen species (Figure 1).

### **Gene families evolution using CAFE**

Lineage-specific gene family expansion and contraction may cause differences in phenotype and physiology between species. To estimate the changes in gene repertoire in the kiwi, the most likely gene family size was inferred at all internal nodes of the TreeFam annotation for the sixteen species mentioned above. The expansion and contraction analysis of the orthologous protein families was performed by CAFE (computational analysis of gene family evolution) version 3.0 [2].

The method employs a stochastic birth-death process in gene family evolution, taking into account the phylogenetic tree topology and branch lengths. A UPGMA-rooted phylogenetic tree [49] was constructed for each of the 623 single-copy orthologs across the 16 species, as defined by TreeFam. Next, a majority-rule consensus tree was built



and the topology distance was calculated for each of the tree to the consensus using the ape package methodology in R [50]. Increasing the number of independent loci when building the consensus tree can lead to a partially unresolved species-tree topology [51]. R\* consensus trees have been shown to be consistent estimators of species-tree topologies for any number of taxa with an increasing probability as the number of gene trees increases [51]. Since the R\* consensus algorithm does not estimate branch lengths, a tree with minimum topologic distance to the consensus was considered for further analysis. Another assumption in the model [2] is that all families have an equal probability of changing over time from the initial state  $X_0 = s$ , to size  $c$  over time  $t$ ; the probability for  $X_t = c$  is:

$$P(X_t = c | X_0 = s) = \sum_{j=0}^{\min(s,c)} \binom{s+c-j-1}{j-1} \alpha^{s+c-2j} (1-2\alpha)^j$$

where  $\alpha = \lambda t \div (1 + \lambda t)$  and  $\lambda$  represents the birth death parameter. An initial family size  $X_0 = 0$  results in a probability of 0 for birth and death. Therefore the initial lambda estimation was restricted to families in which  $X_0 > 0$ , excluding at first lineage-specific families. A global parameter  $\lambda$  was calculated using maximum likelihood, to describe gene birth and death across all branches in the tree for all gene families. The estimated  $\lambda$  was 0.0007 when all 16 species were included, lower than estimations from previously published studies, which included only Neoaves and estimated  $\lambda$  to 0.0011 [52, 53]. Exclusion of the night birds and the two *Palaeognathae* – ostrich and tinamou lead to a  $\lambda$  of 0.00104844, similar to the studies, which had included only Neoaves, suggesting that the  $\lambda$  calculation is consistent with previous reports.

Gene gains and losses were considered for families with a conditional p-value < 0.01 and with a significantly different kiwi branch. If the size of the kiwi branch gene family was larger than the ancestral family, the event was considered an expansion and the

opposite was a contraction. The average expansion on the kiwi branch was 0.272, while ostrich and tinamou had a net overall contraction -0.160 and -0.052, respectively. Of the birds, the only ones showing overall expansions were chicken (0.027), duck (0.007), and zebra finch (0.196).

In total on the kiwi branch 2,046 gene families were expanded, 822 were contracted.

Over both categories 130 were significantly different from other lineages. For the families, which were significantly expanded in kiwi (Viterbi p-value < 0.05) we manually verified the genes clustering in the family. If two genes (A and B) clustered in the same TF family and were annotated on the same scaffold with coordinates in close proximity, we inspected the scaffold between the coordinates separating gene A and gene B. If stretches of Ns were detected, the predicted gene A and B were considered fragments of the same gene. After manual curation, 85 of the initial 130 TF families were still significant. Supplementary Table S6 shows the gene families significantly changed on the kiwi branch with a Viterbi p-value lower than 0.05.

To check whether significant contraction/expansion events cluster in different GO categories we tested enrichment using ClueGO with a hypergeometric test [3]. Briefly, Pfam IDs corresponding to the TreeFam families were assigned to GO categories. We separately considered the significantly contracted families and the expanded families as the test dataset and measured against the background set of the chicken GO annotations. Categories belonging to biological process with a p-value lower than 0.0001 were grouped in functional networks and the non-redundant GO categories are shown in Supplementary Fig. S2.

### **Detection and classification of the membrane proteome**

For comparison with kiwi, complete protein sequence sets for the following bird and reptile species were downloaded from Ensembl 74 [16]: *Taeniopygia guttata*, *Meleagris gallopavo*, *Ficedula albicollis*, *Anas platyrhynchos*, *Pelodiscus sinensis*, *Gallus gallus*, and

*Anolis carolinensis*. *Homo sapiens* from the same Ensembl version was used as outgroup. To detect more reliably kiwi-specific changes the membrane proteome was annotated additionally in two nocturnal birds – barn owl and chuck-will's-widow and two ratites – ostrich and tinamou sequenced to date [54]. The protein data set was filtered by only including the longest protein sequence for each gene. Membrane proteins and signal peptides were predicted for kiwi and the additional eleven birds and reptiles with Phobius [55].

The predicted membrane proteins were classified based on a manually curated human membrane proteome dataset, which describes family relationship and molecular function. The predicted membrane proteins were aligned to the human membrane proteome dataset with the BLASTP program of the BLAST package using default settings (v. 2.2.27+). Each predicted membrane protein was classified according to its best human hit with an e-value  $< 10^{-6}$ . Predicted membrane proteins with no hit were deemed unclassified, along with those proteins that hit an unclassified human protein.

There were no significant differences in the total number of predicted transmembrane proteins or in the ratio of classified to unclassified proteins in the kiwi genome in comparison to the other high quality bird and reptile genomes in Ensembl 74 [16] (Supplementary Table S7). While the ratio of classified to unclassified proteins was higher in the four genomes from the study of Zhang et al. [54], the total number of predicted proteins was consistently lower than in the other annotated genomes. However, since most of the annotated proteins could be classified, the present assemblies generally provide a reasonable substrate for further analysis.

CAFE [2] was employed as previously described to check for expansion and contraction events in the analyzed membrane proteomes. The calculated birth and death on the 13 species constructed phylogeny was 0.0009. On average in kiwi there was an expansion (average expansion parameter was 0.505), the same in tinamou (0.115) and the ratite node (0.051), while ostrich showed on average contraction (-0.614). Expansions

happened in song birds (0.268) and *Galloanserae* (0.108), while nocturnal birds showed contraction (-0.468).

We validated that expanded families from the CAFE analysis are not caused by overestimation of gene counts due to fragmentation. This was done by alignment of human and kiwi proteins in each family with MAFFT (v7) using the option E-INS-I with default settings (an iterative refinement method that uses the weighted sum-of-pairs score and consistency score from local alignments with a generalized affine gap cost). The resulting alignments were used to calculate a preliminary maximum-likelihood phylogenetic tree for each family with FastTree (v2,1,8) [56] using the WAG substitution model and default settings. In each tree, instances where two or more kiwi proteins clustered with one human protein were analyzed in the alignments to determine whether the kiwi proteins aligned to different parts of the human protein which would indicate fragmentation rather than true duplications of the gene. After validation the gene count for each family was corrected accordingly. We validated 18 families that were significantly expanded in kiwi but not in *Palaeognathae* and found that 11 were affected by fragmentation. The fragmentation of genes was caused both by erroneous gene predictions and unresolved bases in the assembly resulting in gene-split onto different scaffolds.

After the number of genes was manually adjusted, CAFE analysis was rerun and significant changes on the kiwi branch are shown in Supplementary Table S7.

## **Phylogenetic analysis**

### **Nuclear loci phylogeny**

The 623 single-copy orthologs (862,710 bp) identified using TreeFam in the 16 species mentioned above were used to build a consensus phylogeny from a nuclear perspective. Genes were aligned against each other using Muscle [29] version 3.8.31. The resulting alignments were loaded in PAUP\* [10] version 4.0d105 and trees were inferred using a

maximum likelihood criterion, with default parameters and the Hasegawa-Kishino-Yano [57] nucleotide substitution model. To measure the confidence for the tree, a series of 100 bootstrap replicates were performed (Figure 1). All nodes had 100% bootstrap support.

To further check the position of tinamou in the *Palaeognathae* clade, we additionally used an extended dataset of coding sequences from 3,939 orthologs (14,104,428 bp) in 8 bird species: kiwi, ostrich, tinamou, turkey, chicken, zebra finch, chuck-will's-widow, and barnowl. Multiple alignments and trees were built using the same approach as described above. All nodes had 100% bootstrap support (**Error! Reference source not found.A**). We furthermore inquired the bird phylogeny from birdtree (<http://birdtree.org/>) on the same species: *Apteryx mantelli*, *Struthio camelus*, *Tinamus guttatus*, *Gallus gallus*, *Meleagris gallopavo*, *Taeniopygia guttata*, *Tyto alba*, and *Caprimulgus carolinensis* using first the Ericson (**Error! Reference source not found.B**) and then Hackett backbone (**Error! Reference source not found.C**) [11] with 100 generated trees. Both phylogenies agreed with the topology of our tree, while in the Hackett et al. study [58], ostrich is presented as basal.

#### **Ultra-conserved non-coding elements phylogeny in birds**

Ultra-conserved non-coding elements were downloaded from UCNEbase [12] and orthologous regions in *Apteryx mantelli*, *Struthio camelus*, *Tinamus guttatus*, *Tyto alba*, *Antrostomus carolinensis*, *Ficedula albicollis*, *Taeniopygia guttata*, *Anas platyrhynchos*, and *Meleagris gallopavo* were established as described in Supplementary Note: Ultra-conserved non-coding elements analysis.

3,076 UCNEs had a length of at least 95% of the chicken reference UCNE in all investigated genomes. We used this set (1,011,462 bp) to build a bird phylogeny [10]. The alignments were loaded in PAUP\* [10] version 4.0d105 and trees were inferred using a maximum likelihood criterion, with default parameters and the Hasegawa-

Kishino-Yano [57] nucleotide substitution model. To measure the confidence for the tree, a series of 100 bootstrap replicates were performed. All nodes had 100% bootstrap support.

Our results show different positions in the tree of the tinamou, according to the conservation level of the DNA sequence used (**Error! Reference source not found.; Error! Reference source not found.**) and suggests that the 19 loci used across the 169 species in the Hackett et al. study [58] could have been highly conserved to facilitate their amplification across multiple species.

### **Mitochondrial phylogeny**

To compute the mitochondrial phylogeny, mitochondrial genome sequences from various species (Supplementary Table S17) were pooled alongside the previously described kiwi mitochondrial genome assembly. Sequences were aligned using *prank* [59] v 0.111130. Again, trees were inferred from aligned sequences loaded in PAUP\* [10] under a maximum likelihood criterion, using the same parameters described in the section above and a 100 bootstrap replicates were performed (Supplementary Fig. S8A). Mitochondrial alignments were further analyzed using BEAST v1.6.2. An uncorrelated relaxed clock model with log-normal distribution and mean of  $2.4 \times 10^{-9}$  was used and the GTR model was employed for the site model. A prior on the TMRCA for the Emu and Cassowary of  $2.55 \times 10^7$  years and a standard deviation of  $5.5 \times 10^6$  was set according to [60]. A total of 10 million MCMC chains were performed, with sampling at every 1,000 chain to produce a tree. The effective sample size (ESS) was calculated for the input parameters. The TMRCA had an ESS above 100, a minimum threshold recommended by the software manual ([http://www.beast2.org/wiki/index.php/Increasing\\_ESSs](http://www.beast2.org/wiki/index.php/Increasing_ESSs) accessed 10/20/2014). The first 1,000 out of 10,000 trees were considered burn-ins and discarded from the analysis. Divergence times are presented in Supplementary Fig. S8B.

The mitochondrial phylogeny shows a split between the North Island and South Island kiwi species about 10 million years ago. The resulting tree shows that despite their common geographical location, New Zealand ratites (kiwi and moa) are not monophyletic [61-64] (Supplementary Fig. S8). Our phylogeny provides good support for kiwi as sister group to the extinct Madagascan elephant bird (bootstrap value of 100%) and the extant Australian ratites (emu and cassowary) (bootstrap value of 93%), although the topology of other branches is still unstable, as shown by the lower bootstrap values. Making inferences about phylogeny, speciation, divergence times, and conservation from mitochondrial DNA data alone has been previously reported to be susceptible to errors [65]. Ostrich still has an unstable position in the phylogeny (Supplementary Fig. S8A) [62]. In the case of tinamou, the tree was thought to be solved by introducing nuclear data [61], while our phylogenies still show conflicting topologies (Supplementary Fig. S6; Supplementary Fig. S7). Hence, to securely determine ratite phylogeny mitochondrial DNA alone is insufficient and nuclear, ideally whole genome data would be required from more ratite species.

## **Vision analysis**

### **Rhodopsin genes identification and annotation**

The Pfam database was locally installed (version 26) and all bird and reptile proteomes (Ensembl release 74 [16]), as well as two ratites (*Tinamus guttatus*, *Struthio camelus*) and two nocturnal birds (*Antrostomus carolinensis*, *Tyto alba*) (GigaDB [17]) were searched against it using the Pfam\_scan.pl script obtained from the Pfam ftp-site (<ftp://ftp.sanger.ac.uk/pub/databases/Pfam/Tools/>) with default settings. In Pfam, the *Rhodopsin* family of GPCRs is represented by a specific hidden Markov model [Pfam: PF00001 or 7tm\_1]. All sequences that were assigned to the 7TM\_1 (PF00001) HMM profile in the Pfam-search were considered to be homologues of the *Rhodopsin* family and were included for further subfamily classification and annotation. The script

Pfam\_scan.pl uses a homology criterion set by the Pfam database, which is based on a manually curated gathering threshold for each model. The gathering threshold of a Pfam model makes sure that any sequence must attain a score greater than or equal to the threshold to be deemed significant. The gathering threshold of the 7TM\_1 (PF00001) HMM model is a score of 23.8 which equates to an e-value of approximately 0.01.

To assign subfamily level classification for the identified *Rhodopsin* class receptors, a standalone BLASTP search against the human GPCRs was performed. BLASTP searches had standard default settings, with a word size of 3 and BLOSUM62 scoring matrices. The *Rhodopsin* class GPCRs from the human GPCR repertoire were downloaded and tagged with the subfamily categorization. The *Rhodopsin* class receptors from bird and reptile genomes were then searched against the database consisting of the tagged human *Rhodopsin* GPCRs. If at least four of the five best hits were in the same subfamily after the BLASTP search, sequences were assigned to it.

#### **Additional results for the vision analysis**

##### *OPN1MW*

To validate the missense mutation in codon 134 (transition of G to A in the kiwi branch), which leads to the exchange of Glu<sup>134</sup> with Lys in transmembrane helix 3, DNA was extracted from additional *Apteryx* species *rowi* and *haasti*. To check whether the mutation is also present in other ratites the *OPN1MW* fragment was sequenced in the following species: Cassowary, Emu, Rhea, Tinamou, Eastern moa, and Mappin's moa.

Moa bone samples CM Av8365 (Eastern moa) and W336 (Mappin's moa) were kindly provided by Canterbury Museum and Whanganui Regional Museum, respectively. North Island Brown, Okarito Brown, and Great Spotted kiwi feathers were kindly provided by Rainbow and Fairy Springs, Rotorua; Chris Rickard, Franz Joseph Department of Conservation; and Melanie Nelson, Arthur's Pass Community Roroa Recovery Project, respectively. Emu and rhea DNAs were provided by Joy Halverson, Zoogen, California.



DNA was extracted from moa bone and kiwi feathers bases following the procedures outlined in McCallum et al. [47, 66] and Hartnup et al. [4, 67], respectively.

2  $\mu$ L of DNA extract (~2 – 10 ng) was amplified in a 10  $\mu$ L volume containing 50 mM Tris-Cl, pH 8.8, 20 mM  $(\text{NH}_4)_2\text{SO}_4$ , 2.5 mM  $\text{MgCl}_2$ , 1 mg/ml BSA, 200  $\mu$ M of each dNTP, ~0.3 U of Platinum Taq, 0.5  $\mu$ M of each primer (rhFF, 5'agtcgacgcttctagcttCCTGTGGTCCCTGGT; rhR, 5'GATGCCCATCATGGCGT). A generic sequencing primer was added to the forward primer (lower case) to allow single pass sequencing. The mix was subjected to 94°C 2 min (x1) then (94°C for 20 sec, 58°C for 1 min) for 43 cycles using an ABI GeneAmp System 9700. Amplified fragments were detected by agarose gel electrophoresis in 0.5  $\times$  Tris-borate-EDTA buffer (TBE), stained with 50 ng/mL ethidium bromide in TBE, and then visualized over UV light. Amplified products were purified by centrifugation through ~100  $\mu$ L of dry Sephacryl S200HR, then sequenced at the Griffith University DNA Sequencing Facility (Australia) using Applied Biosystems (ABI) BigDye Terminator v3.1 chemistry and an ABI3730 Genetic Analyzer. Sequences were visualized and edited in Sequencer.

*OPN1MW* was also annotated in *Tinamus guttatus*, *Struthio camelus*, *Antrostomus carolinensis*, and *Tyto alba* genomes. The deleterious mutation was present in all sequenced kiwi samples and absent in other ratites, which all presented an ERY motif (Figure 2).

#### *OPN1SW*

To validate the missense mutation, which leads to the substitution of Glu<sup>6.30</sup> with Gly in the kiwi *OPN1SW*, aligned reads from both individuals AT5 and kiwi code 73 to *AptMant0* were inspected. This confirmed the presence of the mutation in both individuals with support from all aligned reads. *OPN1SW* is absent in the *Struthio camelus*, *Antrostomus carolinensis*, and *Tyto alba* assemblies as suggested by the missing *OPN1SW* annotation in those genomes, and by the lack of either reliable reciprocal blast

hits to the zebra finch SWS1 transcript ENSTGUT00000016824 or the Pfam domain-based annotation. Only a partial sequence could be identified in the *Tinamus guttatus* genome (Tma\_R005000, which had been wrongly assigned to Source = ENSTGUT00000010973; Function = "RHO-2" in the original annotation). While partial coding sequences from *Caprimulgus europaeus* (AY227187.2) and *Struthio camelus* (AY227189.3) could be retrieved from GenBank, these did not correspond to the TM6 sequence present in kiwi and could not be used to either verify the mutation, or for following selection analysis.

#### *Ka/Ks analysis*

To check whether the opsin evolutionary rate is kiwi-specific, or shared with either nocturnal birds, or other ratites, selection analysis was performed by sequentially appointing kiwi, barn owl, chuck-will's-widow, ostrich, and tinamou as foreground branch (Supplementary Table S10). The branch model was run using CODEML package [9] with parameters model = 2, fix\_omega = 1, for the null model, and fix\_omega = 0, for the alternative model. LRTs were calculated between the two models and also using the null model in which all branches were considered equal (model = 0). The first comparison (model = 2 vs. model = 2 with fixed omega to 1) tests whether  $Ka/Ks$  in the foreground branch is significantly higher than 1. The second comparison (model = 2 vs. model = 0) tests whether a model which assumes a different omega in kiwi than in the set of all other branches in the tree is has a higher likelihood than the one where one omega is estimated for all sites and branches in the tree.

We observed a faster evolution in *RHO* gene in both kiwi and chuck-will's-widow, while tinamou showed a slower evolutionary rate. However, this gene does not evolve neutrally in either of the tested species. For *OPN1MW* and *OPN4-2* the faster evolution was kiwi-specific. Unlike *OPN1MW*, *OPN4-2* seems to evolve neutrally in kiwi.

To test whether opsin inactivation in kiwi is either a result of positive selection or loss of constraint, a branch-site analysis was performed using estimates from CODEML [9] with parameters model = 2, NSsites = 2, fix\_omega = 1, for the null model, and fix\_omega = 0, for the alternative model, and otherwise default parameters. For the *OPN1MW*, the alternative model was not a better fit. The same model was run for the *OPN1SW* fragment, TM6 and TM7 and this resulted in no positively selected sites, although the branch model predicted a significantly faster evolution on the kiwi branch ( $\omega_{kiwi} = 0.192$ ,  $\omega_{other\ birds} = 0.013$ , p-value < 0.005). A branch-site test was run for *RHO* and *OPN4-2* and neither showed any positively selected sites.

To estimate the period of time for which the loss of constraint has been operating we made the following assumptions:

- Before the loss of constraint happened on the kiwi branch  $\omega_{1kiwi} = \omega_{background}$  branches
- The loss of constraint happened in a short period of time, after which no selective force acted on the gene rendering  $\omega_{2kiwi} = 1$
- The observed  $\omega_{3kiwi} = \frac{a*\omega_{1kiwi}+b*\omega_{2kiwi}}{2}$ , where a is the period of time before the loss of constraint, b is the period of time after the gene evolved neutrally and a+b = 1. Hence  $b = \frac{2\omega_{3kiwi} - \omega_{1kiwi}}{1 - \omega_{1kiwi}}$ .

Using the above model, and calculating  $\omega$  on *OPN1MW* and *OPN1SW* with model = 2 with kiwi appointed as foreground branch [9] (Table 2), and the split time between kiwi and the background branches (ostrich – 53 million years – for *OPN1MW* (Supplementary Fig. S8B); chuck-will's-widow – 105.9 million years – for *OPN1SW* (<http://www.timetree.org>)) the estimated time when the loss of constraint happened on the vision opsins is 38 million years for *OPN1SW* and 30 million years for *OPN1MW*.

### *GO significant categories*

Using the previously described ranking of faster evolving genes on the kiwi branch (section “Gene Ontology and rapidly evolving genes”), we searched for vision related GO categories which showed enrichment and extracted genes which clustered in the nodes with a significantly different evolution in kiwi (Supplementary Fig. S8C).

Of the presented genes, the one mostly related to bird physiology is *cOpn5L2*, a mammalian type of neuropsin described as an ultraviolet-sensitive pigment of the retina and other photosensitive organs in birds [68]. The faster evolution of this gene could well be related to the faster evolving *OPN4-2* (**Error! Reference source not found;** Supplementary Table S10) and a potential function in the photoperiodic gonadal regulation in kiwi [69].

### **Olfaction analysis**

#### **Olfactory receptor genes identification and annotation**

To compile a comprehensive set of olfactory receptors (ORs) in kiwi, both the Augustus *de novo* gene prediction and the Maker guided gene prediction output datasets were searched. Scaffold positions of the prediction/annotation were then checked and redundant sequences were removed. Four steps were performed to annotate ORs:

1. 211 functional ORs from the chicken genome [70-72] were downloaded and aligned against the kiwi transcriptome using TblastN with default parameters (word size 3 and Blossom 62 scoring matrix). After collecting overall hits for each query, identical (same) hits from each run were removed to obtain a non-redundant dataset.
2. A Pfam search against the kiwi proteome, with a default e-value cutoff of 1.0 was used to identify sequences that contained 7tm\_4 domain (olfactory domain).

3. The 7tm\_4 domain was searched against the kiwi proteome by a CDD search (conserved domain database search). A CDD search with default search parameters may contain few non-specific hits and lead to false positives. The false positive-matches to proteins that were not ORs were later excluded, in accordance to a phylogenetic analysis where non-ORs clustered outside of the OR variation.
4. Separate HMM profiles were built from conserved 7tm regions of functional ORs of chicken (211 sequences) and zebra finch (137 sequences) obtained from previous studies [70-72]. Also, a separate HMM profile using turkey ORs (80 sequences) was built. Using the three HMM profiles, HMM searches were performed against the kiwi proteome and non-redundant hits were retrieved from combined results of all three searches.

Sequences obtained from all of the above steps still included several redundant hits, pseudogenes, as well as non-ORs. A CD-HIT (Cluster Database at High Identity with Tolerance) was performed to remove identical sequences with a cut-off of 100%. On the final dataset of 402 sequences preliminary phylogenetic analysis was performed using the MEGA (version 6) software package [73, 74] and a maximum likelihood (ML) approach. Non-ORs were removed if they clustered separately from ORs with a high confidence value. Furthermore, non-ORs were cross-verified using BlastP, Pfam, and CDD search.

For the kiwi ORs, we excluded pseudogene candidates if at least one premature stop codon and/or frameshifts could be identified in the kiwi sequence. After the removal of redundant hits, pseudogenes, and non-ORs, we were able to annotate 88 unique OR sequences in kiwi. See flowchart Supplementary Fig. S12.

ORs are highly duplicated in vertebrate genomes. This property can be exploited to gain a second estimate of the OR repertoire in kiwi based on genomic coverage. Our method follows these steps:

1. The kiwi hits were extracted according to their genomic position;
2. All sequences were manually curated and fragment sequences were combined into one predicted gene if they belonged to the same query protein;
3. Coverage in the genomic area was calculated using samtools mpileup version 0.1.18 [37] on the BWA alignment of the short-insert-size libraries to the assembled genome;
4. Coverage was normalized to the average genome size coverage according to the GC content of the OR receptor, obtaining an estimate of fold increase in comparison to the genome average.

After coverage correction a total of 141 OR genes were estimated in the kiwi genome, of which 86 were full length ORs and 55 represented pseudogenes because of frameshifts, premature stop codons or truncations.

#### **Comparative phylogenetic analysis on ORs from kiwi and other bird and reptile genomes**

Refinements of the genome sequences quality and annotations can impact the estimates of gene families' sizes [75]. Thus, we downloaded the most recent proteomes to date of all bird and reptile genomes from Ensembl 74.

Using the procedure mentioned above, the OR gene repertoire was estimated in all bird and reptile genomes for comparative phylogenetic analysis with the kiwi OR dataset. All obtained OR genes were then aligned using MAFFT (v7) (<http://mafft.cbrc.jp/alignment/server/>) [76, 77], with BLOSUM62 as the scoring matrix and using default settings of option E-INS-I. Only the transmembrane regions were considered for phylogenetic trees and sequences with long gaps due to the lack of one or more transmembrane regions were removed. Phylogenetic analysis was run using both ML and neighbor joining (NJ) approaches as implemented in the MEGA (v5.2) software package. For all the ML and NJ trees constructed for the OR analysis, we utilized Jones, Taylor, and Thornton (JTT) as the amino acid substitution model. All sites

were considered for estimating phylogenetic inference. For all trees, a non-parametric bootstrap analysis was run for 500 replicates and a consensus tree was obtained using the replicates. The phylogenetic trees obtained from both approaches were drawn in FigTree 1.3.1 (<http://tree.bio.ed.ac.uk/software/figtree/>) (Figure 3).

### **Additional results for the olfaction analysis**

#### *ORs protein structure*

ORs are 300-350 amino acids long and contain structural features common to GPCRs such as seven hydrophobic transmembrane domains (TM), a potential disulfide bond between the highly conserved cysteines in extracellular loops 1 and 2 and some conserved short sequences [78]. To classify a 7TM sequence as OR, several specific features should be tested, such as the unusually long second extracellular loop2 (EC2) and conserved amino acid motifs like LHTPMY in intracellular loop1 (IC1), MAYDRY at the end of TM3 and beginning of IC2, SY at the end of TM5, FSTC at the beginning of TM6 [79]. An amino acid sequence logo was generated from the Muscle-alignment of the OR paralogs in all birds and reptiles, using the WebLogo program [14]. The annotation of the kiwi OR repertoire and the interspecies variation level were checked (Supplementary Fig. S9). The logos illustrate the sequence conservation of ORs and notably avian ORs show higher conservation in comparison to turtle and green anole (indicated by fewer and larger letters at individual positions in the logo). Interestingly, the MAYDRY motif at the end of TM3, previously reported to be a signature motif for mammalian ORs [80], is highly conserved in kiwi, nocturnal birds, ostrich, chicken, and duck, while song birds and tinamou show higher variation. TM3, TM4, and TM5 contain hypervariable regions involved in odorant molecules recognition [79]. We identified four of the OR-specific conserved regions. The variable regions and also the higher conservation level in the avian clade compared to reptiles are depicted in Supplementary Fig. 9. The higher conservation level in *Aves* compared to reptiles can be

a result of the  $\gamma$ -c expansion in birds, as these receptors have highly similar sequences [71, 81].

*$\gamma$ -c clade ORs within-species protein sequence entropy*

To check for within-species sequence similarity in the  $\gamma$  clade of the Shannon entropy (H) was calculated using the function implemented in the BioEdit program [47] with the following equation:

$$H = - \sum_{i=1}^M P_i \log_2 P_i$$

where  $P_i$  is the fraction of residues of amino acid type  $i$ , and  $M$  is the number of amino acid types (20) [70].  $H$  ranges from 0 (only one residue is present at that position) to 4.322 (all 20 residues are equally represented in that position).  $H \geq 2.0$  is considered as a variable position, whereas  $H \leq 2$  as conserved. Highly conserved positions are those with  $H \leq 1.0$  [82]. To ensure that  $H$  is calculated over homologous amino acid positions, the  $\gamma$  clade ORs were aligned with the Muscle program [29] pairwise between bird species. Gaps were excluded and  $H$  was averaged across all positions for each of the two species separately. Average entropies were  $1.231 \pm 0.158$  – kiwi,  $1.105 \pm 0.127$  – chicken (Ensembl 74 orthologs and  $0.732 \pm 0.07$  for ORs from the study by Steiger et al. [71]),  $1.022 \pm 0.149$  – duck,  $1.086 \pm 0.045$  – flycatcher,  $1.067 \pm 0.081$  – turkey,  $0.340 \pm 0.056$  – zebra finch,  $0.893 \pm 0.119$  – tinamou,  $0.694 \pm 0.081$  – ostrich,  $1.067 \pm 0.130$  barn owl, and  $1.082 \pm 0.147$  – chuck-will's-widow. The difference in entropy calculations in the chicken OR repertoire between the Ensembl 74 annotations and the Steiger et al. study [71] supports the curation of the dataset in the newer Ensembl release, by removing redundant sequencing artifacts. A Wilcoxon rank test was performed using the average  $H$  estimates in kiwi against all other tested birds. This confirmed the significant difference with kiwi showing a higher variation in  $\gamma$  clade OR (p-value = 0.003).



## **Limb development analysis**

Wing development genes orthologs were assigned among four bird species: kiwi, chicken, zebra finch, and turkey to study the conservation of these genes on each lineage (Supplementary Fig. S3; Supplementary Table S12). Corresponding orthologs were aligned [29] and multiple alignments were translated and manually inspected. No obvious alterations could be identified in the inspected genes.

### **Selection analysis on limb development genes**

Sequences were aligned in kiwi and at least three of the following bird species: chicken, zebra finch, turkey, flycatcher, duck, falcon, and rock dove. Evidence for selective pressures was evaluated under the branch models implemented in CODEML [9]. We tested branch models, the most simple (model = 0, one ratio) of which admits a single  $\omega$  ratio for the entire tree and the more general (model = 2, two-ratio), which allows a different  $\omega$  ratio for the tested kiwi branch. These two models were compared via a likelihood ratio test (LRT). The level of significance for these LRTs was calculated using a chi-square approximation given that twice the difference of log likelihood between the models ( $2\Delta\ln L$ ) will asymptotically have a  $\chi^2$  distribution, with a number of degrees of freedom corresponding to the difference of parameters between the nested models (in this case, 1 degree of freedom [44]).

### **Hox cluster annotation**

The vestigial wings of *Apteryx* suggest that limb development differs in this bird and changes in the HOX gene clusters may constitute the genetic cause. Therefore, we analyzed the HOX gene clusters in more detail. The workflow of the analysis is summarized in Supplementary Fig. S4A. We first identified the scaffolds and isolated contigs harboring (putative) *HOX* genes by blast [5] and then mapped all 673 sauropsid

HOX protein sequences from GenBank [6] for which cluster membership and paralog group were annotated to these scaffolds/contigs. The translation of the *Apteryx* sequences was compared to the database protein sequences by means of clustalw alignments and subsequent manual inspection. We found all 39 *HOX* genes expected for the Sauropsid ancestor [8] (Supplementary Fig. S4C). Furthermore, we observed that the *Apteryx* HOX protein sequences are virtually identical to those of other birds, in particular *Galliformes*. Thus, there are no indications that changes in the protein sequences might explain wing morphology in *Apteryx mantelli*.

We therefore proceeded to investigating the regulatory sequences within the HOX clusters by phylogenetic footprinting, i.e., we asked whether ancient, conserved DNA elements were preferentially lost in *Apteryx mantelli* compared to *Galliformes*. To this end, we used tracker2 [7], a software tool that was previously used to investigate the evolution of non-coding DNA elements in HOX clusters. In brief, the tool first computes pairwise local sequence alignments of non-coding sequences with high sensitivity from the syntenic regions anchored by the delimiting *HOX* genes, combines these to overlapping local clusters, and then uses the co-linear arrangement of local footprint clusters as a filter to increase the specificity. This last step is sensitive to local assembly errors. We therefore compared the *Apteryx mantelli* HOX cluster sequences with the sequences of the homologous HOX clusters from *Gallus gallus* and *Anas platyrhynchos* (Ensembl 74). To minimize false positives, i.e., an overestimation of footprint loss, we removed duplicate sequences from the *Apteryx* HOX clusters, arranged HOX clusters distributed on multiple scaffolds/contigs into a single sequence, and changed the order of a few small contigs to match the order observed in the other birds. Although we cannot rule out that the apparent rearrangements in kiwi are real, we interpret them as assembly problems (i) because they are flanked by accumulations of undetermined sequence positions (“N”) and (ii) all rearrangements are order preserving (i.e., there are only transpositions but no reversals). The edited sequences together with the *HOX* gene

positions are available at <http://www.bioinf.uni-leipzig.de/~studla/KIWI-HOX/> and <https://bioinf.eva.mpg.de/KIWI-HOX/>.

Although the distances between the *HOX* genes in the *Apteryx* sequences in terms of coordinates appear to be expanded by a factor of about 1.5 relative to other birds, this effect is entirely explained by the size of inserted blocks of Ns. Uninterrupted intervals of *Apteryx* sequence very closely match the length of the homologous sequence intervals in the duck and chicken *HOX* clusters. Within the accuracy allowed by the genome assembly *AptMant0*, the size of the kiwi *HOX* clusters closely matches their counterparts in duck and chicken, with no observed major insertions or deletions. Counts of conserved phylogenetic footprints are therefore directly comparable between chicken, duck, and kiwi.

Ancestrally present footprints are determined from five outgroup species: a shark (either hornshark *Heterodontus francisci* or Elephant shark *Callorhinchus milli*), the basal actinopterygian *Polypterus senegalus* (*HOXA* only), the coelacanth *Latimeria menadoensis*, the frog *Xenopus tropicalis* (*HOX B, C, D*), and human. Two ingroups, chicken and duck, were used to compensate at least partially for the less than perfect state of the genome assemblies of both chicken (Galgal4) and duck (BGI duck 1.0). For chicken *HOXA*, *HOXB*, and *HOXC* we used *HOX* cluster sequences which were improved by manual curation and additional sequencing [83]. Given the incompleteness of some of the genome assemblies, in particular the *HOXC* clusters of birds, and some differential losses of *HOX* genes in early vertebrate evolution that also affected the adjacent non-coding sequences, only the *HOXA* clusters could be assayed in full length, while the analysis of the other three clusters, *HOX B, C, and D*, had to be restricted to the core regions *HOXB9-HOXB1*, *HOXC13-HOXC8*, *HOXD12-HOXD3* indicated by gray background in Supplementary Fig. S4C. Footprint losses are summarized in Supplementary Table S11. Since footprints (i.e., functional elements) tend to be retained or lost as entities, nucleotide counts cannot be treated as Poisson variables (see e.g.

[84]). Statistical significance of footprint count differences thus is evaluated directly in terms of the footprint counts, or by dividing the total length of lost footprints by the average length of conserved elements.

Our analysis clearly does not support an accelerated loss of footprints in *Apteryx mantelli*. The alternative hypothesis of a reduced loss (and hence a more ancestral state) of the HOX clusters in *Apteryx* compared to *Galliformes* and songbirds is a tempting hypothesis, but also not significantly supported by the available data. We thus can only conclude that the reduced morphology of the kiwi's wings is not reflected in a dramatic restructuring of HOX gene clusters. A deeper analysis of possible involvement of HOX gene regulation will require improved sequencing of HOX cluster sequences not only in *Apteryx* and preferably additional ratites, but also in song birds and *Galliformes*.

#### ***Fibin* identification and selection analysis**

*Fibin*, one of the genes involved in forelimb development [85] (Supplementary Fig. S3), could not be identified among the annotated genes. *Fibin* sequences for the following species *Bos taurus*, *Cavia porcellus*, *Chinchilla lanigera*, *Ficedula albicollis*, *Gallus gallus*, *Heterocephalus glaber*, *Melopsittacus undulatus*, *Octodon degus*, *Ovis aries*, *Pseudopodoces humilis*, and *Taeniopygia guttata* were downloaded from GenBank [6]. Additionally, we used the annotated *fibin* in *Struthio camelus* provided by Leon Huynen (unpublished data). TblastX from the BLAST package [5, 28] was used to align the sequences to *AptMant0*. This resulted in 4 scaffolds containing blast hits with e-values lower than  $10^{-20}$ . After close inspection of all hit regions, 3 of the 4 scaffolds were discarded, as aligned regions were short (20-30 bp) and had low complexity. Scaffold87: 19,476,180-19,476,716 presented reliable hits, with the 537 bp mapping on the forward strand to the 3' UTR of the *Gallus gallus fibin*. Given the observed results the assembly was inspected further. A gap of 2,350 bp is present on scaffold87: 19,473,482-19,475,763, upstream of the *fibin* 3' UTR match. A 416-bp sequence lies directly between this gap

and the 3' UTR match (Supplementary Fig. S15). Since *fibin* is a single exon gene in most well-annotated genomes, this sequence was expected to match *fibin* and was aligned against the nr/nt, refseq-rna, refseq-genomic, HTGS, and wsg nucleotide collections using Tblastx (<http://blast.ncbi.nlm.nih.gov/Blast.cgi>). We retrieved no significant similarities (all blast hits had an e-value higher than 1).

We further designed primers based on the chicken and ostrich (partial) *fibin* coding sequences and Sanger-sequenced 276 bp of the kiwi AT5 *fibin* genomic sequence and kiwi 1612 *fibin* cDNA. After the partial sequence retrieval we aligned the transcriptomic reads from individual 16-12 using BWA (Version: 0.5.10) [36]. We used BLASTN to align with higher sensitivity the entire raw transcriptomic reads. Reads that aligned at the edges of the sequence with 100% identity and a hit length of at least 20 bp were collected and assembled manually using the chicken *fibin* coding sequence as reference. After four similar iterations we reconstructed the entire coding sequence of the *fibin* in kiwi. Transcriptomic reads were realigned using BWA to the final complete sequence and the alignment was visualized using IGV (version 2.3.25) [86] to proof the correctness of the assembly.

We proceeded further by testing the selective pressures acting on this gene. We first tested selection as described above using sequences from: kiwi, chicken, zebra finch, and turkey. The  $\omega$  ratio for all branches (model = 0, one ratio) in the phylogeny was 1.35. We then fixed the  $\omega$  to the neutral value of 1 on the one ratio branch model (model = 0, NSSites = 0, fix\_omega = 1, omega = 1). LRT between the fix\_omega-model and the one where  $\omega$  was estimated was 1.53 (1 degree of freedom) failed to reach significance. Thus, the calculated  $\omega$  is not significantly  $> 1$  on all tested branches.

Given the signs of positive selection in the preliminary analysis, extended selection analysis was performed using 15 species: human, mouse, bat, whale, dolphin, turtle, lizard, python, flycatcher, chicken, zebra finch, frog, zebrafish, and pufferfish. We further employed the branch model and branch-site models (CODEML). First, the one-ratio

model (model = 0) was used to preliminarily estimate the average  $\omega$  value on all tested species. Then, the two-ratio model (model = 2) was used to detect selective pressure acting on particular branches. These two models were compared between each other, and, also, they were separately compared to their respective null models ( $\omega = 1$  for all lineages or for the foreground branch, respectively). We also used the free ratio model, which allows  $\omega$  variation among branches, to estimate the  $\omega$  value on each branch and detect different selective pressures. This revealed human and zebra finch having an estimated  $\omega = 999$  (NA), which is indicative for lack of estimate given too few sites with synonymous exchanges [9]. Thus, further analyses were performed after removing these two species from the phylogeny and alignment.

Appointing each of the species in the phylogeny as the foreground branch failed to reach significance. We thus appointed multiple species (with estimated  $\omega > 1$  in the free ratio model) as the foreground branch. This revealed a faster evolution signal in python, mouse, bat, kiwi, zebrafish and pufferfish (LRT = 4.186, p-value = 0.04,  $\omega_{\text{background}} = 1.07$ ,  $\omega_{\text{foreground}} = 2.13$ ). The LRT to the model where  $\omega$  is fixed to the neutral value of 1 was significant (LRT = 6.89, p-value = 0.009) (.).

Lastly, since positive selection can often act on a few sites and in a short period of evolutionary time, we performed branch-site analysis with CODEML, comparing a model where some sites are allowed to have  $\omega > 1$  and  $\omega$  can vary between sets of branches (model = 2, NSsites = 2) to the null model (model = 2, NSsites = 2, fix\_omega = 1, omega = 1).

These models were used to test for positive selection on a small number of sites along the different branches. Sites with selection signatures were found in bat, frog, kiwi, lizard, turtle, and zebrafish (.).

### Ultra-conserved non-coding elements analysis

The set of 4,351 UCNEs were downloaded from UCNEbase [12]. UCNEs are defined as non-coding human DNA regions with  $\geq 95\%$  sequence identity between human and chicken and  $> 200\text{bp}$  length. The sequence identity threshold corresponds to a base substitution rate of approximately 1% per 100 million years [87]. The length of the UCNEs ranges from 200–1419 bp with a mean = 325 bp and a median = 283 bp. The total length is 1.4 Mb [12].

We used Blast 2.2.25 [28] with "blastn" and default parameters to retrieve the orthologous regions in *Apteryx mantelli*, and *Struthio camelus*, *Tinamus guttatus*, *Tyto alba*, *Anrostomus carolinensis* genomes, downloaded from GigaDB [17], and birds from Ensembl 74 [16] *Ficedula albicollis*, *Taeniopygia guttata*, *Anas platyrhynchos*, and *Meleagris gallopavo*. For each genome only the best blast hit according to the e-value was retained. We used *Gallus gallus* genome Ensembl 74 as control in the orthology assignment and checked the number of mismatches to the reference UCNE. Orthologous regions from each of the species were aligned [29] to the reference UCNE and the number of mismatches between the UCNE and the target genomes were determined. The multiple fasta files and entire sets of results are deposited at <https://bioinf.eva.mpg.de/KIWI-UCNEs/>. UCNEs with higher number of changes than the expected 5% are presented in Supplementary Table S13.

## Supplementary References

1. Kelley DR, Schatz MC, Salzberg SL: **Quake: quality-aware detection and correction of sequencing errors.** *Genome Biol* 2010, **11**:R116.
2. De Bie T, Cristianini N, Demuth JP, Hahn MW: **CAFE: a computational tool for the study of gene family evolution.** *Bioinformatics* 2006, **22**:1269-71.
3. Bindea G, Mlecnik B, Hackl H, Charoentong P, Tosolini M, Kirilovsky A, Fridman WH, Pages F, Trajanoski Z, Galon J: **ClueGO: a Cytoscape plug-in to decipher functionally grouped gene ontology and pathway annotation networks.** *Bioinformatics* 2009, **25**:1091-3.
4. Tanaka M: **Molecular and evolutionary basis of limb field specification and limb initiation.** *Dev Growth Differ* 2013, **55**:149-63.
5. Gertz EM, Yu YK, Agarwala R, Schaffer AA, Altschul SF: **Composition-based statistics and translated nucleotide searches: improving the TBLASTN module of BLAST.** *BMC Biol* 2006, **4**:41.
6. Benson DA, Cavanaugh M, Clark K, Karsch-Mizrachi I, Lipman DJ, Ostell J, Sayers EW: **GenBank.** *Nucleic Acids Res* 2013, **41**:D36-42.
7. Prohaska SJ, Fried C, Flamm C, Wagner GP, Stadler PF: **Surveying phylogenetic footprints in large gene clusters: applications to Hox cluster duplications.** *Mol Phylogenet Evol* 2004, **31**:581-604.
8. Pascual-Anaya J, D'Aniello S, Kuratani S, Garcia-Fernandez J: **Evolution of Hox gene clusters in deuterostomes.** *BMC Dev Biol* 2013, **13**:26.
9. Yang Z: **PAML 4: phylogenetic analysis by maximum likelihood.** *Mol Biol Evol* 2007, **24**:1586-91.
10. Wilgenbusch JC, Swofford D: **Inferring evolutionary trees with PAUP\*.** *Curr Protoc Bioinformatics* 2003, **Chapter 6**:Unit 6 4.
11. Jetz W, Thomas GH, Joy JB, Hartmann K, Mooers AO: **The global diversity of birds in space and time.** *Nature* 2012, **491**:444-8.
12. Dimitrieva S, Bucher P: **UCNEbase--a database of ultraconserved non-coding elements and genomic regulatory blocks.** *Nucleic Acids Res* 2013, **41**:D101-9.



13. Drummond AJ, Rambaut A: **BEAST: Bayesian evolutionary analysis by sampling trees.** *BMC Evol Biol* 2007, **7**:214.
14. Crooks GE, Hon G, Chandonia JM, Brenner SE: **WebLogo: a sequence logo generator.** *Genome Res* 2004, **14**:1188-90.
15. Holzapfel S, Robertson HA, McLennan JA, Sporle W, Hackwell K, Impey M: **Kiwi (Apteryx spp.) recovery plan.** *Threatened Species Recovery Plan* 2008, **60**.
16. Flicek P, Ahmed I, Amode MR, Barrell D, Beal K, Brent S, Carvalho-Silva D, Clapham P, Coates G, Fairley S, et al: **Ensembl 2013.** *Nucleic Acids Res* 2013, **41**:D48-55.
17. Sneddon TP, Zhe XS, Edmunds SC, Li P, Goodman L, Hunter CI: **GigaDB: promoting data dissemination and reproducibility.** *Database (Oxford)* 2014, **2014**:bau018.
18. Li H, Coghlan A, Ruan J, Coin LJ, Heriche JK, Osmotherly L, Li R, Liu T, Zhang Z, Bolund L, et al: **TreeFam: a curated database of phylogenetic trees of animal gene families.** *Nucleic Acids Res* 2006, **34**:D572-80.
19. Prüfer K, Muetzel B, Do HH, Weiss G, Khaitovich P, Rahm E, Pääbo S, Lachmann M, Enard W: **FUNC: a package for detecting significant associations between gene sets and ontological annotations.** *BMC Bioinform* 2007, **8**:41.
20. Bowers M, Eng L, Lao Z, Turnbull RK, Bao X, Riedel E, Mackem S, Joyner AL: **Limb anterior-posterior polarity integrates activator and repressor functions of GLI2 as well as GLI3.** *Dev Biol* 2012, **370**:110-24.
21. Church VL, Francis-West P: **Wnt signalling during limb development.** *Int J Dev Biol* 2002, **46**:927-36.
22. Gao Y, Lan Y, Liu H, Jiang R: **The zinc finger transcription factors Osr1 and Osr2 control synovial joint formation.** *Dev Biol* 2011, **352**:83-91.
23. Geetha-Loganathan P, Nimmagadda S, Christ B, Huang R, Scaal M: **Ectodermal Wnt6 is an early negative regulator of limb chondrogenesis in the chicken embryo.** *BMC Dev Biol* 2010, **10**:32.
24. Koshiba-Takeuchi K, Takeuchi JK, Arruda EP, Kathiriya IS, Mo R, Hui CC, Srivastava D, Bruneau BG: **Cooperative and antagonistic interactions**

- between Sall4 and Tbx5 pattern the mouse limb and heart.** *Nat Genet* 2006, **38**:175-83.
25. Rallis C, Bruneau BG, Del Buono J, Seidman CE, Seidman JG, Nissim S, Tabin CJ, Logan MP: **Tbx5 is required for forelimb bud formation and continued outgrowth.** *Development* 2003, **130**:2741-51.
  26. Rallis C, Del Buono J, Logan MP: **Tbx3 can alter limb position along the rostrocaudal axis of the developing embryo.** *Development* 2005, **132**:1961-70.
  27. Tanaka M, Cohn MJ, Ashby P, Davey M, Martin P, Tickle C: **Distribution of polarizing activity and potential for limb formation in mouse and chick embryos and possible relationships to polydactyly.** *Development* 2000, **127**:4011-21.
  28. Altschul SF, Gish W, Miller W, Myers EW, Lipman DJ: **Basic local alignment search tool.** *J Mol Biol* 1990, **215**:403-10.
  29. Edgar RC: **MUSCLE: multiple sequence alignment with high accuracy and high throughput.** *Nucleic Acids Res* 2004, **32**:1792-7.
  30. Renaud G, Stenzel U, Kelso J: **leeHom: adaptor trimming and merging for Illumina sequencing reads.** *Nucleic Acids Res* 2014, **42**:e141.
  31. Marcais G, Kingsford C: **A fast, lock-free approach for efficient parallel counting of occurrences of k-mers.** *Bioinformatics* 2011, **27**:764-70.
  32. Luo R, Liu B, Xie Y, Li Z, Huang W, Yuan J, He G, Chen Y, Pan Q, Liu Y, et al: **SOAPdenovo2: an empirically improved memory-efficient short-read de novo assembler.** *GigaScience* 2012, **1**:18.
  33. Harris RS: **Improved pairwise alignment of genomic DNA.** . The Pennsylvania State University, 2007.
  34. Kuhn RM, Karolchik D, Zweig AS, Wang T, Smith KE, Rosenbloom KR, Rhead B, Raney BJ, Pohl A, Pheasant M, et al: **The UCSC Genome Browser Database: update 2009.** *Nucleic Acids Res* 2009, **37**:D755-61.
  35. Zhou Q, Zhang J, Bachtrog D, An N, Huang Q, Jarvis ED, Gilbert MT, Zhang G: **Complex evolutionary trajectories of sex chromosomes across bird taxa.** *Science* 2014, **346**:1246338.
  36. Li H, Durbin R: **Fast and accurate short read alignment with Burrows-Wheeler transform.** *Bioinformatics* 2009, **25**:1754-60.

37. Miskelly CM, Dowding JE, Elliott GP, Hitchmough RA, Powlesland RG, Robertson HA, Sagar PM, Scofield RP, Taylor GA: **Conservation status of New Zealand birds, 2008.** *Notornis* 2008, **55**:117-35.
38. Pop M, Phillippy A, Delcher AL, Salzberg SL: **Comparative genome assembly.** *Brief Bioinform* 2004, **5**:237-48.
39. Cantarel BL, Korf I, Robb SM, Parra G, Ross E, Moore B, Holt C, Sanchez Alvarado A, Yandell M: **MAKER: an easy-to-use annotation pipeline designed for emerging model organism genomes.** *Genome Res* 2008, **18**:188-96.
40. Jurka J, Kapitonov VV, Pavlicek A, Klonowski P, Kohany O, Walichiewicz J: **Rebase Update, a database of eukaryotic repetitive elements.** *Cytogenet Genome Res* 2005, **110**:462-7.
41. Stanke M, Keller O, Gunduz I, Hayes A, Waack S, Morgenstern B: **AUGUSTUS: ab initio prediction of alternative transcripts.** *Nucleic Acids Res* 2006, **34**:W435-9.
42. Moreno-Hagelsieb G, Latimer K: **Choosing BLAST options for better detection of orthologs as reciprocal best hits.** *Bioinformatics* 2008, **24**:319-24.
43. Yang Z: **PAML: a program package for phylogenetic analysis by maximum likelihood.** *Comput Appl Biosci* 1997, **13**:555-6.
44. Yang Z: *Computational Molecular Evolution.* Oxford: Oxford University Press; 2006.
45. Nam K, Mugal C, Nabholz B, Schielzeth H, Wolf JB, Backstrom N, Kunstner A, Balakrishnan CN, Heger A, Ponting CP, et al: **Molecular evolution of genes in avian genomes.** *Genome Biol* 2010, **11**:R68.
46. Schneider A, Souvorov A, Sabath N, Landan G, Gonnet GH, Graur D: **Estimates of positive Darwinian selection are inflated by errors in sequencing, annotation, and alignment.** *Genome Biol Evol* 2009, **1**:114-8.
47. Hall TA: **BioEdit: a user-friendly biological sequence alignment editor and analysis program for Windows 95/98/NT.** *Nucleic Acids Symp Ser* 1999, **41**:95-8.

48. Finn RD, Clements J, Eddy SR: **HMMER web server: interactive sequence similarity searching.** *Nucleic Acids Res* 2011, **39**:W29-37.
49. Leschner J, Wennerberg G, Feierler J, Bermudez M, Welte B, Kalatskaya I, Wolber G, Faussner A: **Interruption of the ionic lock in the bradykinin B2 receptor results in constitutive internalization and turns several antagonists into strong agonists.** *J Pharmacol Exp Ther* 2013, **344**:85-95.
50. Zelenitsky DK, Therrien F, Ridgely RC, McGee AR, Witmer LM: **Evolution of olfaction in non-avian theropod dinosaurs and birds.** *Proc Biol Sci* 2011, **278**:3625-34.
51. Degnan JH, DeGiorgio M, Bryant D, Rosenberg NA: **Properties of consensus methods for inferring species trees from gene trees.** *Syst Biol* 2009, **58**:35-54.
52. Cho YS, Hu L, Hou H, Lee H, Xu J, Kwon S, Oh S, Kim HM, Jho S, Kim S, et al: **The tiger genome and comparative analysis with lion and snow leopard genomes.** *Nat Commun* 2013, **4**:2433.
53. Huang Y, Li Y, Burt DW, Chen H, Zhang Y, Qian W, Kim H, Gan S, Zhao Y, Li J, et al: **The duck genome and transcriptome provide insight into an avian influenza virus reservoir species.** *Nat Genet* 2013, **45**:776-83.
54. Zhang G, Li C, Li Q, Li B, Larkin DM, Lee C, Storz JF, Antunes A, Greenwold MJ, Meredith RW, et al: **Comparative genomics reveals insights into avian genome evolution and adaptation.** *Science* 2014, **346**:1311-20.
55. Kall L, Krogh A, Sonnhammer EL: **An HMM posterior decoder for sequence feature prediction that includes homology information.** *Bioinformatics* 2005, **21 Suppl 1**:i251-7.
56. Price MN, Dehal PS, Arkin AP: **FastTree 2--approximately maximum-likelihood trees for large alignments.** *PLoS One* 2010, **5**:e9490.
57. Hasegawa M, Kishino H, Yano T: **Dating of the human-ape splitting by a molecular clock of mitochondrial DNA.** *J Mol Evol* 1985, **22**:160-74.
58. Hackett SJ, Kimball RT, Reddy S, Bowie RC, Braun EL, Braun MJ, Chojnowski JL, Cox WA, Han KL, Harshman J, et al: **A phylogenomic study of birds reveals their evolutionary history.** *Science* 2008, **320**:1763-8.

59. Loytynoja A, Goldman N: **Phylogeny-aware gap placement prevents errors in sequence alignment and evolutionary analysis.** *Science* 2008, **320**:1632-5.
60. Bunce M, Worthy TH, Phillips MJ, Holdaway RN, Willerslev E, Haile J, Shapiro B, Scofield RP, Drummond A, Kamp PJ, Cooper A: **The evolutionary history of the extinct ratite moa and New Zealand Neogene paleogeography.** *Proc Natl Acad Sci U S A* 2009, **106**:20646-51.
61. Baker AJ, Haddrath O, McPherson JD, Cloutier A: **Genomic support for a Moa-Tinamou clade and adaptive morphological convergence in flightless ratites.** *Mol Biol Evol* 2014, **31**:1-38.
62. Cooper A, Lalueza-Fox C, Anderson S, Rambaut A, Austin J, Ward R: **Complete mitochondrial genome sequences of two extinct moas clarify ratite evolution.** *Nature* 2001, **409**:704-7.
63. Cooper A, Mourer-Chauviré C, Chambers GK, von Haeseler A, Wilson AC, Pääbo S: **Independent origins of New Zealand moas and kiwis.** *Proc Natl Acad Sci U S A* 1992, **89**:8741-4.
64. Mitchell KJ, Llamas B, Soubrier J, Rawlence NJ, Worthy TH, Wood J, Lee MS, Cooper A: **Ancient DNA reveals elephant birds and kiwi are sister taxa and clarifies ratite bird evolution.** *Science* 2014, **344**:898-900.
65. Wiens JJ, Kuczynski CA, Stephens PR: **Discordant mitochondrial and nuclear gene phylogenies in emydid turtles: implications for speciation and conservation.** *Biological Journal of the Linnean Society* 2010, **99**:445-61.
66. McCallum J, Hall S, Lissone I, Anderson J, Huynen L, Lambert DM: **Highly informative ancient DNA 'snippets' for New Zealand moa.** *PLoS One* 2013, **8**:e50732.
67. Hartnup K, Huynen L, Te Kanawa R, Shepherd LD, Millar CD, Lambert DM: **Ancient DNA recovers the origins of Maori feather cloaks.** *Mol Biol Evol* 2011, **28**:2741-50.
68. Ohuchi H, Yamashita T, Tomonari S, Fujita-Yanagibayashi S, Sakai K, Noji S, Shichida Y: **A non-mammalian type opsin 5 functions dually in the photoreceptive and non-photoreceptive organs of birds.** *PLoS One* 2012, **7**:e31534.

69. Kang SW, Kuenzel WJ: **Deep-brain photoreceptors (DBPs) involved in the photoperiodic gonadal response in an avian species, Gallus gallus.** *Gen Comp Endocrinol* 2015, **211**:106-13.
70. Shannon CE: **The mathematical theory of communication.** *The Bell system technical Journal* 1948, **27**:379-243 & 623-56.
71. Steiger SS, Kuryshev VY, Stensmyr MC, Kempnaers B, Mueller JC: **A comparison of reptilian and avian olfactory receptor gene repertoires: species-specific expansion of group gamma genes in birds.** *BMC Genomics* 2009, **10**:446.
72. Ballesteros JA, Jensen AD, Liapakis G, Rasmussen SG, Shi L, Gether U, Javitch JA: **Activation of the beta 2-adrenergic receptor involves disruption of an ionic lock between the cytoplasmic ends of transmembrane segments 3 and 6.** *J Biol Chem* 2001, **276**:29171-7.
73. Tamura K, Peterson D, Peterson N, Stecher G, Nei M, Kumar S: **MEGA5: molecular evolutionary genetics analysis using maximum likelihood, evolutionary distance, and maximum parsimony methods.** *Mol Biol Evol* 2011, **28**:2731-9.
74. Shannon C, Weaver W: *The Mathematical Theory of Communication.* University of Illinois Press; 2002.
75. Demuth JP, De Bie T, Stajich JE, Cristianini N, Hahn MW: **The evolution of mammalian gene families.** *PLoS One* 2006, **1**:e85.
76. Katoh K, Standley DM: **MAFFT multiple sequence alignment software version 7: improvements in performance and usability.** *Mol Biol Evol* 2013, **30**:772-80.
77. Vogel R, Mahalingam M, Ludeke S, Huber T, Siebert F, Sakmar TP: **Functional role of the "ionic lock"--an interhelical hydrogen-bond network in family A heptahelical receptors.** *J Mol Biol* 2008, **380**:648-55.
78. Gilad Y, Przeworski M, Lancet D: **Loss of olfactory receptor genes coincides with the acquisition of full trichromatic vision in primates.** *PLoS Biol* 2004, **2**:E5.

79. Kondo R, Kaneko S, Sun H, Sakaizumi M, Chigusa SI: **Diversification of olfactory receptor genes in the Japanese medaka fish, *Oryzias latipes***. *Gene* 2002, **282**:113-20.
80. Singer MS, Weisinger-Lewin Y, Lancet D, Shepherd GM: **Positive selection moments identify potential functional residues in human olfactory receptors**. *Recept Channels* 1996, **4**:141-7.
81. Anisimova M, Liberles DA: **The quest for natural selection in the age of comparative genomics**. *Heredity (Edinb)* 2007, **99**:567-79.
82. Litwin S, Jores R: **Shannon information as a measure of amino acid diversity**. In *Theoretical and experimental insights into immunology. Volume 66*. Edited by Perelson AS, Weisbuch G. Berlin: Springer Berlin Heidelberg; 1992: 279-87: *NATO ASI Series*].
83. Richardson MK, Crooijmans RP, Groenen MA: **Sequencing and genomic annotation of the chicken (*Gallus gallus*) Hox clusters, and mapping of evolutionarily conserved regions**. *Cytogenet Genome Res* 2007, **117**:110-9.
84. Wagner GP, Fried C, Prohaska SJ, Stadler PF: **Divergence of conserved non-coding sequences: rate estimates and relative rate tests**. *Mol Biol Evol* 2004, **21**:2116-21.
85. Wakahara T, Kusu N, Yamauchi H, Kimura I, Konishi M, Miyake A, Itoh N: **Fibin, a novel secreted lateral plate mesoderm signal, is essential for pectoral fin bud initiation in zebrafish**. *Dev Biol* 2007, **303**:527-35.
86. Thorvaldsdottir H, Robinson JT, Mesirov JP: **Integrative Genomics Viewer (IGV): high-performance genomics data visualization and exploration**. *Brief Bioinform* 2013, **14**:178-92.
87. Retelska D, Beaudoin E, Notredame C, Jongeneel CV, Bucher P: **Vertebrate conserved non coding DNA regions have a high persistence length and a short persistence time**. *BMC Genomics* 2007, **8**:398.

## URLs

*Bird tree*, <<http://birdtree.org/>>;

*Genome size browser*, <<http://www.genomesize.com>>;

*Avian Phylogenomics Project*, <<http://avian.genomics.cn/en/>>;

*AMOScmp-shortReads*, <<http://sourceforge.net/projects/amos/files/>>;

*RepeatMasker Open-3.0.*, <<http://www.repeatmasker.org>>;

*PHYLIP*, <<http://evolution.genetics.washington.edu/phylip.html>>;

*Pfam*, <<ftp://ftp.sanger.ac.uk/pub/databases/Pfam/Tools/>>;

*MAFFT v7*, <<http://mafft.cbrc.jp/alignment/server/>>;

*FigTree 1.3.1*, <<http://tree.bio.ed.ac.uk/software/figtree/>>;

*Ultra-conserved non-coding elements and genomic regulatory blocks*, <<http://ccg.vital-it.ch/UCNEbase>>.
